# **A chemical-genetic map of the pathways controlling drug potency in *Mycobacterium tuberculosis***

Shuqi Li<sup>1\*</sup>, Nicholas C. Poulton<sup>1\*</sup>, Jesseon S. Chang<sup>1</sup>, Zachary A. Azadian<sup>1</sup>, Michael A. DeJesus<sup>1</sup>, Nadine Ruecker<sup>2</sup>, Matthew D. Zimmerman<sup>3</sup>, Kathryn Eckart<sup>1</sup>, Barbara Bosch<sup>1</sup>, Curtis Engelhart<sup>2</sup>, Daniel Sullivan<sup>2</sup>, Martin Gengenbacher<sup>3,4</sup>, Véronique A. Dartois<sup>3,4</sup>, Dirk Schnappinger<sup>2</sup>, Jeremy M. Rock<sup>1</sup>

1: Laboratory of Host-Pathogen Biology, The Rockefeller University, New York, New York, United States of America

2: Department of Microbiology and Immunology, Weill Cornell Medicine, New York, New York, United States of America

3: Center for Discovery and Innovation, Hackensack Meridian Health, Nutley, New Jersey, USA

4: Hackensack Meridian School of Medicine, Hackensack Meridian Health, Nutley, New Jersey, USA

\*: co-first authors

Address correspondence to: [rock@rockefeller.edu](mailto:rock@rockefeller.edu)

## 1 ABSTRACT

2  
3 *Mycobacterium tuberculosis* (Mtb) infection is notoriously difficult to treat. Treatment efficacy is limited by  
4 Mtb's intrinsic drug resistance, as well as its ability to evolve acquired resistance to all antituberculars in  
5 clinical use. A deeper understanding of the bacterial pathways that govern drug efficacy could facilitate the  
6 development of more effective therapies to overcome resistance, identify new mechanisms of acquired  
7 resistance, and reveal overlooked therapeutic opportunities. To define these pathways, we developed a  
8 CRISPR interference chemical-genetics platform to titrate the expression of Mtb genes and quantify  
9 bacterial fitness in the presence of different drugs. Mining this dataset, we discovered diverse and novel  
10 mechanisms of intrinsic drug resistance, unveiling hundreds of potential targets for synergistic drug  
11 combinations. Combining chemical-genetics with comparative genomics of Mtb clinical isolates, we further  
12 identified numerous new potential mechanisms of acquired drug resistance, one of which is associated with  
13 the emergence of a multidrug-resistant tuberculosis (TB) outbreak in South America. Lastly, we make the  
14 unexpected discovery of an "acquired drug sensitivity." We found that the intrinsic resistance factor *whiB7*  
15 was inactivated in an entire Mtb sublineage endemic to Southeast Asia, presenting an opportunity to  
16 potentially repurpose the macrolide antibiotic clarithromycin to treat TB. This chemical-genetic map provides  
17 a rich resource to understand drug efficacy in Mtb and guide future TB drug development and treatment.  
18

## 19 INTRODUCTION

20  
21  
22 Infections caused by the bacterial pathogen *Mycobacterium tuberculosis* (Mtb) are notoriously difficult to  
23 treat. Current standard of care requires a multidrug regimen lasting for several months, which limits patient  
24 compliance and contributes to the development of drug-resistant Mtb (WHO, 2021). While the reasons  
25 necessitating prolonged chemotherapy are multifactorial, including variable drug penetration into Mtb-  
26 containing granulomas (Dartois, 2014) and the presence of phenotypically drug-tolerant bacterial  
27 subpopulations (Balaban et al., 2019), the intrinsic resistance of the infecting bacterium and its ability to  
28 evolve acquired resistance to all antituberculars in clinical use limits treatment efficacy (Colangeli et al.,  
29 2018; Xu et al., 2017).  
30

31 Mtb is intrinsically resistant to many antibacterials. While relatively underexplored, intrinsic resistance is  
32 typically ascribed to the low permeability of the Mtb cell envelope and the numerous efflux pumps encoded  
33 in the Mtb genome (Batt et al., 2020; Jarlier and Nikaido, 1994; da Silva et al., 2011). All acquired drug  
34 resistance in Mtb occurs via mutation, and in recent decades many resistance mutations have been  
35 mapped and characterized (Walker et al., 2015). These mutations most commonly occur in the drug target  
36 or drug activator, reducing the affinity of the drug-target interaction or reducing conversion of the drug to the  
37 bioactive molecule (Banerjee et al., 1994; Walker et al., 2015; Zhang et al., 1992). Yet, our knowledge of  
38 acquired drug resistance in Mtb remains incomplete, particularly for mutations outside of the drug target or  
39 activator and which typically confer low to intermediate, but clinically relevant, levels of drug resistance  
40 (Carter, 2021; Colangeli et al., 2018; Hicks et al., 2020; Walker et al., 2015). A deeper understanding of  
41 both intrinsic and acquired drug resistance in Mtb could facilitate the development of therapies to overcome  
42 resistance mechanisms, improve the diagnosis of drug-resistant TB, and reveal overlooked therapeutic  
43 opportunities (Blondiaux et al., 2017; Hugonnet et al., 2009).  
44

45 To provide a genome-wide overview of the bacterial pathways that control drug potency, we developed a  
46 CRISPR interference (CRISPRi) (Bosch et al., 2021; Choudhary et al., 2015; Qi et al., 2013; Rock et al.,  
47 2017) chemical-genetics platform to titrate the expression of nearly all Mtb genes (essential and non-  
48 essential) and quantify bacterial fitness in the presence of different drugs. This approach identified hundreds  
49 of Mtb genes whose inhibition altered fitness in the presence of partially inhibitory drug concentrations,  
50 including genes encoding the direct drug target and non-target hit genes. Mining this dataset, we discovered  
51 diverse mechanisms of intrinsic drug resistance that can be targeted to potentiate therapy. Overlaying the  
52 chemical-genetic results with comparative genomics of Mtb clinical isolates, we identified new, clinically  
53 relevant mechanisms of acquired drug resistance. Lastly, we make the unexpected discovery of "acquired  
54 drug sensitivities," whereby loss-of-function mutations in intrinsic drug resistance genes render some Mtb  
55 clinical strains hypersusceptible to clarithromycin, a macrolide antibiotic not typically used to treat

56 tuberculosis (TB). This chemical-genetic map provides a rich resource to understand drug potency in Mtb  
57 and guide future TB drug development and treatment.

## 58 59 RESULTS

60  
61 To define genes that alter drug potency in Mtb, we performed 90 CRISPRi screens across nine drugs in the  
62 Mtb reference strain, H37Rv. These screens used a genome-scale CRISPRi library containing 96,700  
63 sgRNAs (Bosch et al., 2021) to enable titratable knockdown for nearly all Mtb genes, including both protein  
64 coding genes and non-coding RNAs (**Figure 1A**). Titrated gene knockdown was achieved by targeting non-  
65 canonical Sth1 dCas9 protospacer adjacent motifs (PAMs) (Rock et al., 2017) and modulating the extent of  
66 complementarity between the sgRNA and DNA target (Bosch et al., 2021). Knockdown tuning enabled  
67 hypomorphic silencing of *in vitro* essential genes, thereby allowing assessment of chemical-genetic  
68 interactions for both *in vitro* essential and non-essential genes to provide a global overview of gene-drug  
69 interactions in Mtb.

70  
71 Anhydrotetracycline (ATc) was added 1, 5, or 10 days prior to drug exposure to transcriptionally activate  
72 CRISPRi and deplete target gene products (**Figure 1A**). Drugs were chosen to represent the majority of  
73 clinically relevant Mtb targets (**Table 1**), including three of the four first-line agents (pyrazinamide was not  
74 included because it is not active under standard culture conditions), four second-line agents, and two drugs  
75 not traditionally used to treat TB. Drugs were screened at concentrations spanning the predicted minimum  
76 inhibitory concentration (MIC) (**Supplemental Figure 1A-I**). Triplicate CRISPRi library cultures were  
77 outgrown in the presence or absence of drug. After outgrowth, we harvested genomic DNA from cultures  
78 treated with three descending doses of partially inhibitory drug concentrations (“High”, “Med”, and “Low”;  
79 **Supplemental Figure 1A-I**) and analyzed sgRNA abundance by deep sequencing. Growth phenotypes  
80 were well correlated among triplicate screens (average Pearson correlation between replicate screens:  $r >$   
81  $0.99$ ). Hits were identified by MAGeCK (Li et al., 2014) as those genes whose CRISPRi inhibition reduced  
82 or increased relative fitness in the presence of a given drug (false discovery rate (FDR)  $< 0.01$ ,  $\log_2$  fold-  
83 change  $|L2FC| > 1$ ). Analysis of the number of unique hit genes across different drugs showed that the 1  
84 and 5-day target pre-depletion datasets recovered the majority ( $>95\%$ ) of unique hits (**Supplemental**  
85 **Figure 2A-I; Supplemental Data 1**). Thus, hit genes were further defined as the union of 1 and 5-day  
86 target pre-depletion screens. These criteria identified 1,373 genes whose knockdown led to sensitization  
87 and 775 genes whose knockdown led to resistance to at least one drug (**Supplemental Data 1**),  
88 representing at least one chemical-genetic interaction for 38.5% ( $n=1,587/4,125$ ) of all annotated genes in  
89 the Mtb genome. Most hit genes had a single chemical-genetic interaction, but some had as many as seven  
90 (**Supplemental Figure 2J, Supplemental Data 1**).

91  
92 The chemical-genetic screens recovered expected hit genes. For example, the genes encoding the targets  
93 of rifampicin (*rpoB*) (Campbell et al., 2001) (**Figure 1B**), isoniazid (*inhA*) (Banerjee et al., 1994) (**Figure**  
94 **1C**), and bedaquiline (ATP synthase) (Andries et al., 2005) (**Figure 1D**) were among the most sensitized  
95 hits in each respective screen. Genes encoding the targets of known synergistic drug combinations were  
96 also recovered, for example ethambutol (*embAB*) + rifampicin and SQ109 (*mmpL3*) + rifampicin (**Figure**  
97 **1B**) (Cokol et al., 2017). Lastly, genes whose inactivation is known to confer acquired drug resistance were  
98 also observed, including glycerol kinase *glpK* (**Figure 1B-D**) (Bellerose et al., 2019; Safi et al., 2019),  
99 catalase-peroxidase *katG* (**Figure 1C**) (Vilchèze and Jacobs JR., 2014), and the transcriptional repressor  
100 *rv0678* (**Figure 1D**) (Andries et al., 2014). Consistent with the robust recovery of expected hits,  
101 benchmarking our CRISPRi approach against published transposon sequencing (TnSeq) chemical-genetic  
102 results revealed a high degree of overlap (63.3-87.7% TnSeq hit recovery; **Supplemental Data 2**) (Xu et  
103 al., 2017), although TnSeq is necessarily restricted to interrogation of *in vitro* non-essential genes, at least  
104 as currently implemented in Mtb.

105  
106 The number of hit genes varied widely across drugs (**Figure 1E,F; Supplemental Data 1; Supplemental**  
107 **Figure 2A-I**), from hundreds for rifampicin, vancomycin, and ethambutol to tens for streptomycin.  
108 Interestingly, *in vitro* essential genes were enriched relative to non-essential genes for chemical-genetic  
109 interactions (**Figure 1E,F; Supplemental Figure 3A**), even when taking into account the bias towards  
110 sgRNAs targeting *in vitro* essential genes in the CRISPRi library. This enrichment demonstrates the

111 increased information content available when assaying essential genes by chemical-genetics and highlights  
112 the power of titratable CRISPRi to assay gene classes typically intractable with more traditional approaches  
113 like TnSeq. Hierarchical clustering of hit genes revealed unique chemical-genetic signatures for each drug  
114 (**Supplemental Figure 3B**) that were then mined for biological insight.

115  
116  
117

**Table 1: Drugs Profiled and their Target Processes**

| Drug           | Abbreviation | Class           | Target Process               |
|----------------|--------------|-----------------|------------------------------|
| Bedaquiline    | BDQ          | Diarylquinoline | ATP synthesis                |
| Clarithromycin | CLR          | Macrolide       | Translation                  |
| Ethambutol     | EMB          | Ethylenediamine | Arabinogalactan biosynthesis |
| Isoniazid      | INH          | Pyridine        | Mycolic acid biosynthesis    |
| Levofloxacin   | LVX          | Fluoroquinolone | DNA replication              |
| Linezolid      | LZD          | Oxazolidinone   | Translation                  |
| Rifampicin     | RIF          | Rifamycin       | Transcription                |
| Streptomycin   | STR          | Aminoglycoside  | Translation                  |
| Vancomycin     | VAN          | Glycopeptide    | Peptidoglycan biosynthesis   |

118  
119

120 Despite the fact that they target distinct cellular processes (**Table 1**), clustering analysis revealed correlated  
121 chemical-genetic signatures for rifampicin, vancomycin, and bedaquiline (**Supplemental Figure 3B**),  
122 suggesting shared mechanisms of intrinsic resistance or sensitivity. Enrichment analysis identified the  
123 essential mycolic acid-arabinogalactan-peptidoglycan (mAGP) complex to be a common sensitizing hit  
124 between rifampicin, vancomycin, and bedaquiline but not the ribosome targeting drugs clarithromycin,  
125 linezolid, or streptomycin (**Supplemental Figure 3C**). The mAGP is the primary constituent of the cell  
126 envelope and has long been known to serve as a permeability barrier that mediates intrinsic drug resistance  
127 in *Mtb* (Batt et al., 2020; Jarlier and Nikaido, 1994; da Silva et al., 2011). Interestingly, it was not obvious  
128 which chemical features for each drug were driving selective sensitization to mAGP disruption  
129 (**Supplemental Figure 3D**) (Davis et al., 2014). For example, despite having similar molecular weights,  
130 bedaquiline (555.5 daltons) displayed a strong mAGP signature whereas streptomycin (581.6 daltons) did  
131 not; despite similar polar surface areas, rifampicin (220 Å<sup>2</sup>) displays a strong mAGP signature but  
132 clarithromycin (183 Å<sup>2</sup>) does not.

133

134 To ensure the validity of the screen results, we quantified drug susceptibility with individual hypomorphic  
135 CRISPRi strains targeting mAGP-biosynthetic genes, demonstrating 2- to 43-fold reductions in IC<sub>50</sub> for  
136 rifampicin, vancomycin, and bedaquiline but little to no change in IC<sub>50</sub> for linezolid (**Supplemental Figure**  
137 **4A-D**). To validate these results chemically, we chose to focus on the β-ketoacyl-ACP synthase KasA. KasA  
138 is an essential component of the FAS-II pathway responsible for elongation of meromycolic acids and is an  
139 actively pursued drug target (Abrahams et al., 2016; Kumar et al., 2018). Consistent with our genetic  
140 results, checkerboard assays demonstrated synergy between the KasA inhibitor GSK3011724A  
141 (GSK'724A) and rifampicin, vancomycin, and bedaquiline but not linezolid (**Supplemental Figure 4E,F**).  
142 Because drug interactions can be influenced by the growth environment (Lenaerts et al., 2015), we also  
143 confirmed the synergy between GSK'724A and rifampicin in a macrophage infection model (**Supplemental**  
144 **Figure 4G**). Consistent with the hypothesis that synergy between GSK'724A and this mechanistically  
145 diverse group of antibiotics could be explained, at least in part, by inhibition of mycolic acid biosynthesis  
146 resulting in improved drug uptake, *Mtb* cultures pre-treated with a sub-MIC dose of GSK'724A showed  
147 increased uptake of ethidium bromide and a fluorescent vancomycin conjugate (**Supplemental Figure**  
148 **4H,I**). These results validate the screen and confirm the role of the mAGP complex as a selective  
149 mechanism of intrinsic resistance relevant for some antitubercular agents but not others (Larrouy-Maumus  
150 et al., 2016).

151

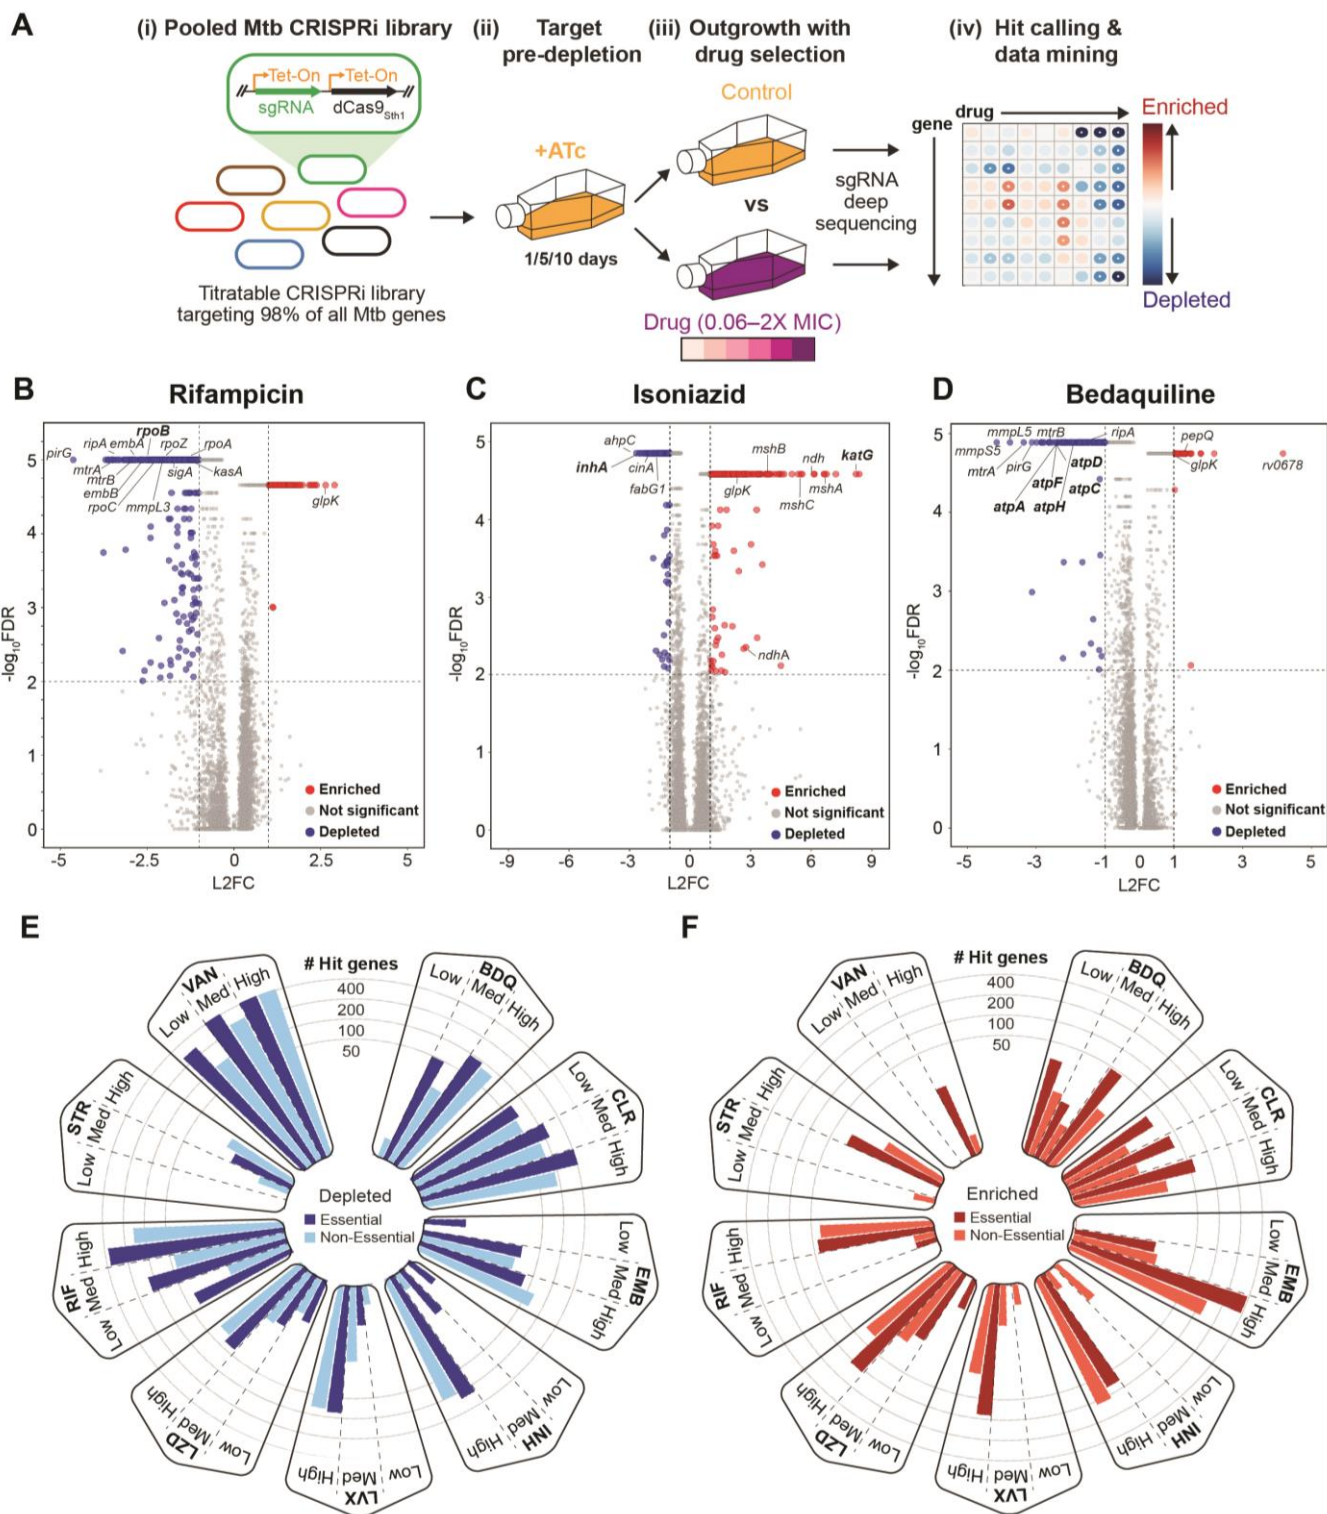

**Figure 1: Chemical-genetic profiling identifies hundreds of genes that alter drug efficacy in *M. tuberculosis***

(A) Experimental design to quantify chemical-genetic interactions in Mtb. (i) The pooled Mtb CRISPRi library contains 96,700 sgRNAs targeting 4,052/4,125 of all Mtb genes. *In vitro* essential genes were targeted for titratable knockdown by varying the targeted PAM and sgRNA targeting sequence length; non-essential genes were targeted only with the strongest available sgRNAs (Bosch et al., 2021). (ii) The CRISPRi inducer anhydrotetracycline (ATc) was added for 1, 5, or 10 days prior to drug exposure to pre-deplete target gene products. (iii) Triplicate cultures were outgrown +ATc in DMSO or drug at six concentrations spanning the predicted minimum inhibitory concentration (MIC). (iv) Following

152  
153  
154  
155  
156  
157  
158  
159  
160  
161  
162

163 outgrowth, genomic DNA was harvested from cultures treated with three descending doses of partially  
164 inhibitory drug concentrations (“High”, “Med”, and “Low”; **Supplemental Figure 1**), sgRNA targeting  
165 sequences amplified for next-generation sequencing, and hit genes called with MAGeCK.  
166 (B-D) Volcano plots showing log<sub>2</sub> fold-change (L2FC) values and false discovery rates (FDR) for each  
167 gene after culture outgrowth in the presence of the indicated drugs. Results for the highest partially  
168 inhibitory concentration (“High”; **Supplemental Figure 1**) for the 5-day CRISPRi library pre-depletion  
169 screen are shown.  
170 (E-F) The number of significantly depleted and enriched hit genes (FDR < 0.01, |L2FC| > 1; union of 1 and  
171 5-day CRISPRi library pre-depletion screens) are shown for the indicated drugs and concentrations  
172 (**Supplemental Figure 1**). Gene essentiality calls were defined by CRISPRi as in (Bosch et al., 2021).  
173  
174

## 175 **The two-component system *mtrAB* and associated lipoprotein *lpqB* promote envelope integrity and** 176 **are central mediators of intrinsic drug resistance in *Mtb***

177  
178 Two of the most sensitizing hit genes across multiple drugs were the response regulator *mtrA* and its  
179 cognate histidine kinase *mtrB* (**Figure 1B,D**; **Figure 2A**; **Supplemental Data 1**), which together encode the  
180 MtrAB two-component signaling system (Gorla et al., 2018; Zahrt and Deretic, 2000). The *mtrAB* operon  
181 also encodes a putative lipoprotein *lpqB* (**Figure 2B**). *lpqB* is proposed to interact with MtrB to promote  
182 MtrA phosphorylation and activation (Nguyen et al., 2010). The similarities between the chemical-genetic  
183 signatures of *mtrAB-lpqB* and mAGP biosynthetic genes (**Figure 2A**; **Supplemental Figure 4B**) are  
184 consistent with a critical role for this two-component system in regulating mAGP integrity. Given the  
185 predicted essentiality of *mtrA*, *mtrB*, and *lpqB* (Dejesus et al., 2017; Zahrt and Deretic, 2000) and the  
186 magnitude by which inhibition of these genes sensitized *Mtb* to various antibiotics, we next sought to better  
187 define the mechanism by which *mtrAB-lpqB* promotes intrinsic drug resistance.  
188

189 Consistent with the predicted essentiality, strong CRISPRi-silencing of *mtrA*, *mtrB*, and *lpqB* prevented *Mtb*  
190 growth (**Figure 2B**). Complementation of CRISPRi knockdown with CRISPRi-resistant *mtrA*, *mtrB*, or *lpqB*  
191 alleles reversed this growth defect (**Figure 2B**), demonstrating specificity for the observed phenotypes.  
192 Whereas inhibition of *mtrB* was bacteriostatic both in axenic culture and macrophages, inhibition of *mtrA*  
193 was bacteriostatic in axenic culture but bactericidal in resting and IFN- $\gamma$  activated macrophages (**Figure 2C**,  
194 **Supplemental Figure 5A,B**). Consistent with the chemical-genetic screen results, knockdown of *mtrA*,  
195 *mtrB*, and *lpqB* strongly sensitized *Mtb* (10-100 fold decreases in IC<sub>50</sub>) to rifampicin, vancomycin, and  
196 bedaquiline, but not other drugs (**Figure 2D**, **Supplemental Figure 5C**). Also consistent with the screen,  
197 the magnitude of drug sensitization was not identical across all three genes, being more similar between  
198 *mtrA* and *mtrB* than *lpqB* (**Figure 2D**). As with inhibition of KasA (**Supplemental Figure 4H,I**), silencing of  
199 *mtrA*, *mtrB*, and to a lesser extent *lpqB* led to increased permeability to ethidium bromide and a fluorescent  
200 vancomycin conjugate (**Figure 2E**). Together, these results suggest that the increase in drug susceptibility  
201 in *mtrAB-lpqB* knockdown strains is at least in part mediated by increased envelope permeability and are  
202 consistent with an essential role for *mtrAB-lpqB* in regulating mAGP integrity.  
203

204 To better understand the mechanism(s) by which the response regulator *mtrA* mediates multi-drug intrinsic  
205 resistance, we next defined its regulon. RNA-sequencing (RNA-seq) following *mtrA* silencing identified 41  
206 significantly down-regulated and 11 significantly upregulated genes ( $p_{\text{adi}} < 0.05$ , |L2FC| > 1) (**Figure 2F**,  
207 **Supplemental Data 3**). Consistent with a direct regulatory role, MtrA was found to bind the promoters of 25  
208 of the significantly down-regulated and two of the significantly upregulated genes in a previously published  
209 ChIP-seq study (**Supplemental Figure 5D**, **Supplemental Data 3**) (Gorla et al., 2018). Upregulated genes  
210 not found to be bound by MtrA included the envelope stress response genes *iniB* and *iniA* (Alland et al.,  
211 2000), and thus at least some of the upregulated genes following *mtrA* silencing may reflect secondary  
212 consequences of envelope stress. A consensus MtrA recognition site derived from promoters of genes  
213 differentially regulated upon *mtrA* inhibition and found to interact with MtrA by ChIP-seq was broadly similar  
214 to previously published MtrA binding-motifs (Gorla et al., 2018; Peterson et al., 2021) (**Supplemental Figure**  
215 **5E**). We next confirmed that *mtrA* and *mtrB* knockdown led to a downregulation of putative MtrA regulon  
216 genes by RT-qPCR (**Supplemental Figure 5F**), validating the RNA-seq results. Surprisingly, in contrast to

217 the results observed with *mtrAB* knockdown, silencing *lpqB* led to an upregulation of MtrA regulon genes  
 218 (**Supplemental Figure 5G**). In contrast to proposed role of LpqB as a positive regulator of this pathway  
 219 (Nguyen et al., 2010), these data instead suggest that LpqB may be a negative regulator of MtrA signaling.  
 220 To distinguish whether MtrA activation in the absence of LpqB requires MtrB, or whether loss of LpqB  
 221 activates MtrA independent of MtrB, we next tested MtrA regulon expression upon simultaneous silencing of  
 222 *mtrB* and *lpqB*. Consistent with the former model, MtrA activation required MtrB in the absence of LpqB  
 223 (**Figure 2G**). These results, as well as the overlapping but distinct chemical-genetic interactions observed  
 224 for *mtrAB* and *lpqB* (**Figure 2A**), are consistent with a model whereby the extracytoplasmic lipoprotein LpqB  
 225 functions as a negative regulator of MtrB to restrain MtrA activation.  
 226

227 While the functions of most of the candidate MtrA regulon genes are unknown, a number of these genes  
 228 encode peptidoglycan remodeling enzymes, including the endopeptidases *ripA*, *ripB*, *ripD*, the amidase  
 229 *ami1*, and the transglycosylase *rpfC* (**Supplemental Data 3**) (Gorla et al., 2018; Peterson et al., 2021;  
 230 Sharma et al., 2015). These gene products are important for proper peptidoglycan remodeling during  
 231 growth and division. Intriguingly, a number of the MtrA regulon genes were also identified as sensitizing hits  
 232 in the chemical-genetic screen, phenocopying the chemical-genetic effects of *mtrA* silencing (**Figure 2A**).  
 233 Transcript levels of neither *mtrAB* nor its regulon were altered in response to antibacterial challenge  
 234 (**Supplemental Figure 5H**), indicating that unlike some two-component signaling systems in *Staphylococci*  
 235 (Rajagopal et al., 2016; Yin et al., 2006), MtrAB is unlikely to be a stress-responsive signaling system.  
 236 Instead, these results highlight the central role of the MtrAB signal transduction pathway in coordinating  
 237 proper peptidoglycan remodeling during bacterial growth and division (**Figure 2H**). These results further  
 238 suggest that both inhibition (MtrAB inhibitors) or activation (LpqB inhibitors) of this pathway has the potential  
 239 to prevent Mtb growth and dramatically reduce intrinsic drug resistance, highlighting the potential utility of  
 240 small molecule inhibitors of this pathway.  
 241

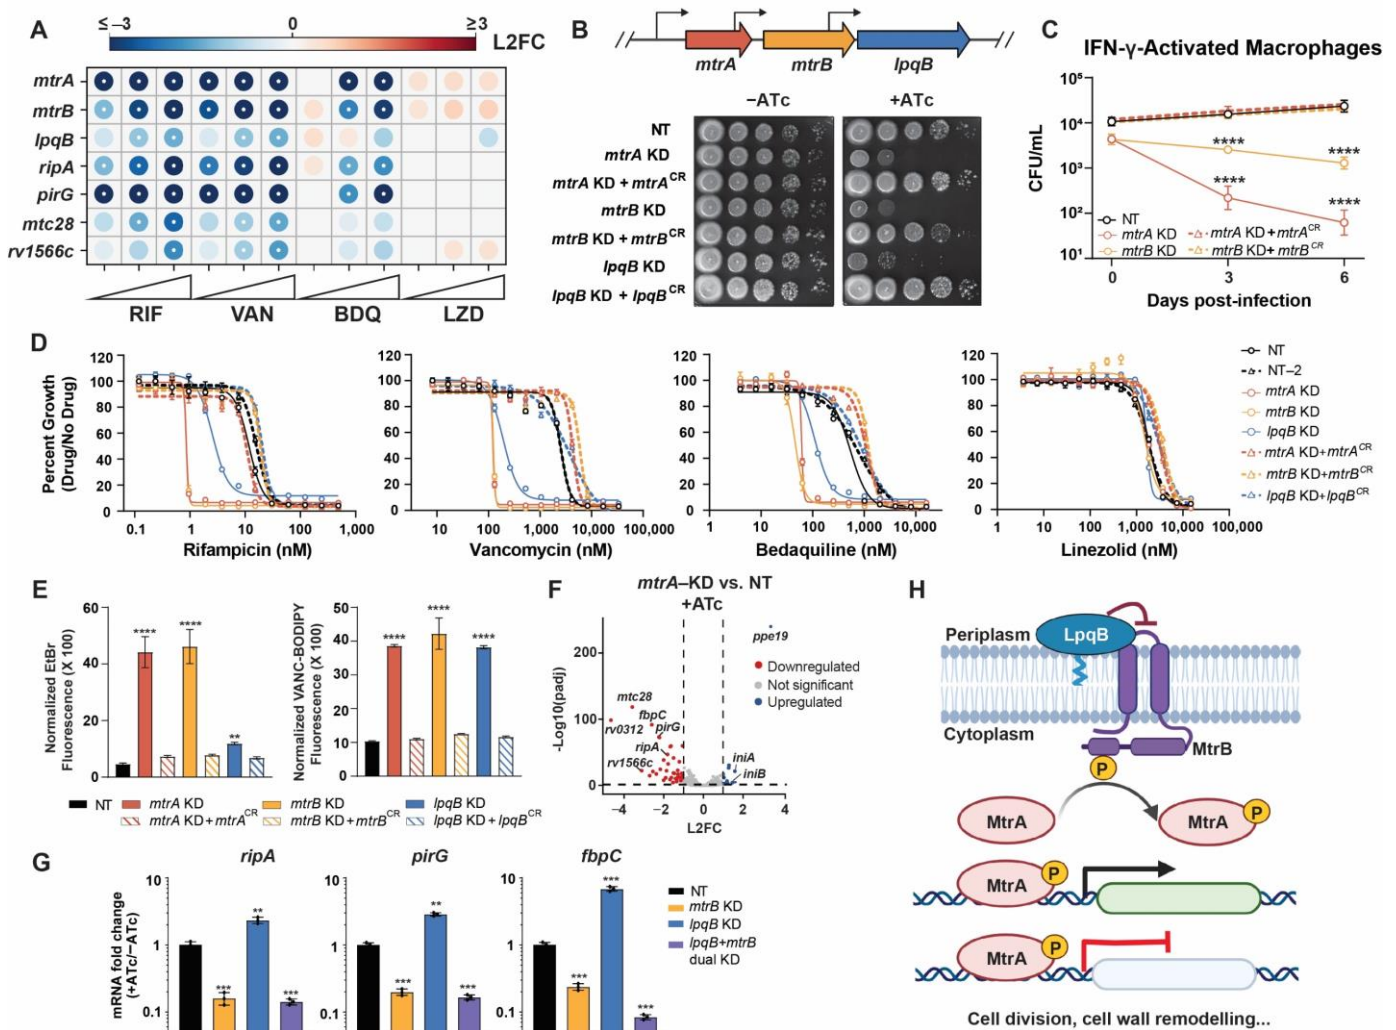

243  
244  
245  
246  
247  
248  
249  
250  
251  
252  
253  
254  
255  
256  
257  
258  
259  
260  
261  
262  
263  
264  
265  
266  
267  
268  
269  
270  
271  
272  
273  
274  
275  
276  
277  
278  
279  
280  
281  
282  
283  
284  
285  
286  
287  
288  
289  
290  
291  
292  
293  
294  
295  
296

## Figure 2: MtrAB-LpqB promote envelope integrity and are central mediators of intrinsic drug resistance

- (A) Feature-expression heatmap of select chemical-genetic hit genes for the indicated drugs from the 5-day CRISPRi library pre-depletion screen. The color of each circle represents the gene-level L2FC. A white dot represents an  $FDR < 0.01$  and a  $|L2FC| > 1$ .
- (B) Growth of the indicated CRISPRi strains. NT = non-targeting; KD = knockdown; CR = CRISPRi-resistant. Transcriptional start sites (Shell et al., 2015) are indicated with black arrows.
- (C) Growth of the indicated CRISPRi strains in IFN- $\gamma$ -activated murine bone marrow derived macrophages. Bacterial strains were exposed to ATc for 24 hours prior to macrophage infection. 3 and 6 days after infection, bacteria were harvested and quantified by colony-forming units (CFU). Data represent mean  $\pm$  SEM for technical triplicates. Significance was determined by two-way ANOVA and adjusted for multiple comparisons. \*\*\*\*,  $p < 0.0001$ .
- (D) MIC values for the indicated drugs were measured against the indicated strains. Data represent mean  $\pm$  SEM for technical triplicates and are representative of at least two independent experiments.
- (E) Ethidium bromide and Vancomycin-BODIPY uptake of the indicated strains. Data represent mean  $\pm$  SEM for three replicates and are representative of at least two independent experiments. Results from an unpaired t-test are shown: \*\*\*\*,  $p < 0.0001$ .
- (F) *mtrA* and NT CRISPRi strains were grown for two days with ATc, after which RNA was harvested and sequenced. L2FC and  $-\log_{10}(p_{adj})$  for each gene are plotted. Dashed lines mark significant hits ( $p_{adj} < 0.05$  and  $|L2FC| > 1$ ).
- (G) Quantification of indicated gene mRNA levels by qRT-PCR. Strains were grown in the presence or absence of ATc for ~3 generations prior to harvesting RNA. Error bars are SEM of three technical replicates. Results from an unpaired t-test are shown: \*\*,  $p < 0.01$ ; \*\*\*,  $p < 0.001$ .
- (H) Schematic of the proposed MtrAB-LpqB signaling system. The histidine kinase MtrB activates the response regulator MtrA to control expression of genes important for proper cell division and cell wall remodeling. The lipoprotein LpqB interacts with MtrB and may negatively regulate MtrB-dependent activation of MtrA.

## A diverse set of pathways contribute to intrinsic resistance and susceptibility to ribosome-targeting antibiotics

Unlike rifampicin, vancomycin, and bedaquiline, inhibition of mAGP biosynthesis did not sensitize Mtb to the three ribosome-targeting drugs streptomycin, clarithromycin, and linezolid (**Supplemental Figure 3C,D; Supplemental Data 1**). Thus, inhibition of mAGP biosynthesis is unlikely to be a relevant mechanism to potentiate the activity of these drugs. A prior publication reported that the cell-wall targeting drug ethambutol can synergize with clarithromycin (Bosne-David et al., 2000). In contrast to these results, neither our screen (**Supplemental Data 1**) nor checkerboard assays (**Supplemental Figure 6A**) validated a potentiating effect of ethambutol with clarithromycin, further validating the specificity of envelope-mediated intrinsic resistance for only a subset of antibiotics.

Streptomycin, the first successful antibiotic used to treat TB, is a natural product aminoglycoside which interacts with the 30S ribosomal subunit and induces mis-translation (**Figure 3A**) (Krause et al., 2016). Because streptomycin can be toxic it is currently reserved for the treatment of drug-resistant TB (Cohen et al., 2020). Clarithromycin is a semi-synthetic macrolide which targets the nascent polypeptide exit tunnel (NPET) and inhibits translation elongation in a sequence-specific manner (Kannan et al., 2014). Clarithromycin has minimal activity against Mtb both *in vitro* and *in vivo* (Luna-Herrera et al., 1995; Truffot-Pernot et al., 1995) and is used rarely as last resort, salvage therapy for multidrug-resistant TB (MDR-TB) (Seung et al., 2014). Linezolid is a synthetic oxazolidinone which targets the peptidyltransferase center (PTC) of the 50S ribosomal subunit, directly adjacent to the clarithromycin binding site, and also inhibits translation elongation in a sequence-specific manner (Marks et al., 2016). Linezolid is used as part of BPaL (Bedaquiline, Pretomanid, Linezolid), a new, potent combination therapy used to treat MDR-TB (Conradie et al., 2020).



297 Streptomycin, clarithromycin, and linezolid had correlated but distinct chemical-genetic signatures (**Figure**  
298 **3B, Supplemental Figure 3B**). Clustering of the ribosome targeting drugs appeared to be driven in large part  
299 by the lack of an mAGP signature (**Supplemental Figure 3B,C; Supplemental Data 1**), rather than any  
300 unique ribosome target signature, which may reflect the different mechanisms of action of the three ribosome  
301 targeting drugs. The sole sensitizing hit gene observed uniquely among the three ribosome targeting drugs  
302 was *whiB7*, a transcription factor that induces a stress response promoting intrinsic resistance to numerous  
303 ribosome-targeting antibiotics (Morris et al., 2005). Grouping hit genes based on predicted function connected  
304 the ribosome targeting antibiotics to both common and unique processes including: rRNA methylation, drug  
305 efflux/import, ribosome rescue, ribosome regulation, proteasome activity, and numerous poorly characterized  
306 genes (**Figure 3B,C**).

307  
308 Consistent with prior publications, we found that rRNA methyltransferases can confer either intrinsic sensitivity  
309 or intrinsic resistance to ribosome-targeting drugs (Wilson, 2014). For example, silencing *erm(37)* resulted in  
310 strong depletion in clarithromycin treatment (**Figure 3B**), consistent with the role of Erm(37) in methylating  
311 the 23S rRNA to prevent macrolide binding (Madsen et al., 2005). Conversely, silencing the 16S rRNA  
312 methyltransferase *gid* resulted in strong enrichment in streptomycin treatment (**Figure 3B**), consistent with  
313 clinical observations whereby mutational inactivation of *gid* confers low-level acquired drug resistance to  
314 streptomycin (Wong et al., 2013). Interestingly, we found that knockdown of the predicted 23S rRNA  
315 methyltransferase *tsnR* confers resistance to linezolid (**Figure 3B**). This is analogous to work in *S. aureus*, in  
316 which loss of the evolutionarily distinct 23S methyltransferase *rlmN* confers linezolid resistance both *in vitro*  
317 and in the clinic (LaMarre et al., 2011; Pi et al., 2019). To determine if loss-of-function (LOF) mutations in  
318 *tsnR* could play a clinically relevant role in acquired linezolid resistance, we assembled a database of >45,000  
319 whole genome sequences from Mtb clinical isolates (**Supplemental Data 4**). Given that linezolid has only  
320 recently been introduced to treat TB and is presently reserved to treat patients failing MDR-TB therapy, we  
321 expected linezolid-resistant TB to be rare. Consistent with this, we identified the most common linezolid-  
322 resistance promoting mutation *rplC*-Cys154Arg (Wasserman et al., 2019) only 122 times in our genome  
323 database. While putative LOF mutations in *tsnR* were even more rare (**Supplemental Data 5**), two MDR  
324 Mtb strains harbored both a *tsnR* frameshift allele (Thr156fs) and an *rplC*-Cys154Arg allele. The co-  
325 occurrence of these two mutations in two MDR Mtb strains is highly unlikely to have occurred by chance ( $\chi^2$   
326 test with Yates' correction:  $p < 0.0001$ ). These data highlight that LOF *tsnR* mutations may serve as  
327 steppingstones to high-level resistance as linezolid is used more widely in the clinic.

328  
329 Given the threat posed by linezolid resistance to future TB drug regimens and issues of linezolid toxicity, we  
330 next sought to determine if our findings could be exploited to identify synergistic drug-target combinations to  
331 overcome resistance and increase the therapeutic index for linezolid, analogous to pre-clinical efforts to boost  
332 ethionamide potency and tolerability (Blondiaux et al., 2017; Conradie et al., 2020). The essential trans-  
333 translation genes, *smpB* and *ssr* (Dejesus et al., 2017), were identified as strong linezolid sensitizing hits  
334 (**Figure 3B,C**). Trans-translation is a ribosome rescue pathway, thought to primarily rescue ribosomes stalled  
335 while translating non-stop mRNA transcripts (Alumasa et al., 2017). Due to its essentiality and potential  
336 importance for stress-tolerance, the trans-translation pathway has garnered attention as a mycobacterial drug  
337 target (Alumasa et al., 2017). Additionally, we identified the poorly characterized gene *rv1473* as a strong and  
338 specific linezolid sensitizing hit (**Figure 3B,C**). *rv1473* was previously reported to be a macrolide efflux pump  
339 (Duan et al., 2019). However, the lack of predicted transmembrane domains suggest *rv1473* is unlikely to be  
340 a membrane-embedded ABC transporter. Rather, homology suggests *rv1473* encodes an antibiotic  
341 resistance (ARE) ABC-F protein that functions to rescue linezolid-stalled ribosomes (**Supplemental Figure**  
342 **6B**) (Antonelli et al., 2018). ARE ABC-F proteins bind to the ribosome to promote dissociation of ribosome-  
343 targeting antibiotics, thereby rescuing ribosomes from translation inhibition (Sharkey et al., 2016).

344  
345 Our data suggest that inhibition of *rv1473* and trans-translation could make linezolid more potent, thereby  
346 lowering the dose of linezolid needed to inhibit bacterial growth. Confirming the screen predictions, individual  
347 CRISPRi knockdown of *rv1473* and *smpB* lowered the IC<sub>50</sub> for linezolid by 2.3- and 5-fold respectively (**Figure**  
348 **3D; Supplemental Figure 6C**) but did not alter sensitivity to other drugs. Inhibition of the Clp protease did  
349 not sensitize Mtb to linezolid (**Supplemental Figure 6D,E**), consistent with the critical role of trans-translation  
350 in rescuing linezolid-stalled ribosomes, not in Clp protease-mediated turnover of *ssrA*-tagged stalled  
351 translation products (Personne and Parish, 2014). Dual CRISPRi knockdown of both *rv1473* and *smpB*

352 lowered the linezolid IC<sub>50</sub> by 12.2-fold (**Figure 3D; Supplemental Figure 6C**), consistent with *rv1473* and  
 353 trans-translation functioning in separate intrinsic resistance pathways. Interestingly, the increased linezolid  
 354 sensitivity in the dual knockdown strain is similar to the magnitude of acquired resistance observed in linezolid-  
 355 resistant clinical strains (Beckert et al., 2012). Thus, we hypothesized that dual inhibition of *rv1473* and *smpB*  
 356 could functionally reverse linezolid resistance. Consistent with this hypothesis, dual knockdown of *rv1473* and  
 357 *smpB* in a linezolid-resistant strain (*rpIC*-Cys154Arg; **Supplemental Figure 6F**) restored linezolid sensitivity  
 358 back to wild-type levels (**Figure 3D; Supplemental Figure 6G**), demonstrating that inhibition of intrinsic  
 359 resistance factors can potentiate linezolid and functionally reverse acquired drug resistance.  
 360  
 361

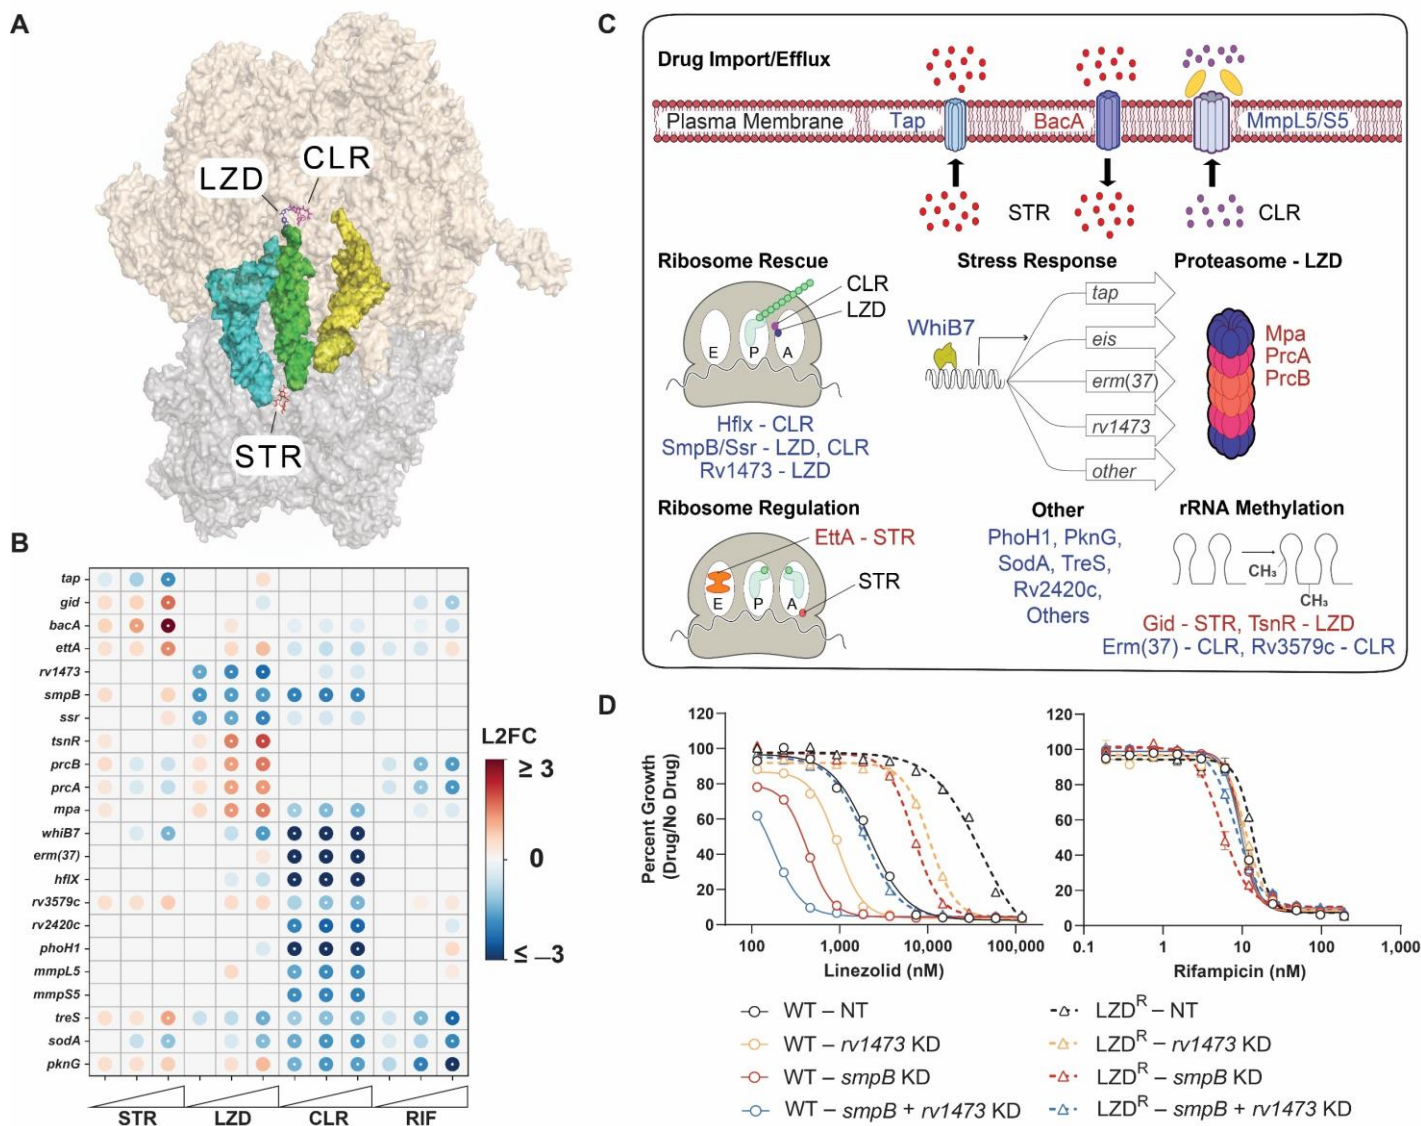

**Figure 3: A diverse set of pathways contribute to intrinsic resistance and susceptibility to three ribosome targeting antibiotics in *M. tuberculosis***

(A) Structure of LZD (blue), CLR (magenta), and STR (red) bound to the ribosome of *Thermus thermophilus*. PDB codes: LZD (3DLL), CLR (1J5A), STR (1FJG), and ribosome with tRNAs (4V5C).  
 (B) Feature-expression heatmap of select genes from the 5-day CRISPRi library pre-depletion screen. The color of each circle represents the gene-level L2FC; a white dot represents an FDR of < 0.01 and a |L2FC| > 1.  
 (C) Chemical-genetic hit genes from panel (B) are involved in a diverse set of cellular pathways. Genes whose CRISPRi inhibition results in decreased or increased relative fitness in the presence of the three ribosome-targeting drugs are listed in blue or red font, respectively.  
 (D) Growth curves for WT and LZR strains with various gene knockdowns for Linezolid and Rifampicin.

362  
 363  
 364  
 365  
 366  
 367  
 368  
 369  
 370  
 371  
 372

373 (D) Single strain validation of LZD-associated hits. MIC values for LZD and RIF were measured for  
374 CRISPRi knockdown strains targeting *smpB* and *rv1473* in H37Rv or *rpIC-Cys154Arg* linezolid-  
375 resistant H37Rv (LZD<sup>R</sup>). Error bars represent the standard error of the mean (SEM) for technical  
376 triplicates. Data are representative of at least two independent experiments.

377  
378

### 379 ***bacA* mutations observed in Mtb clinical isolates confer acquired resistance to aminoglycosides** 380 **and capreomycin**

381

382 Acquired drug resistance is one of the greatest barriers to successful TB treatment. In recent decades,  
383 many acquired drug resistance mutations in Mtb have been mapped and characterized. However, our  
384 knowledge of the genetic basis of acquired drug resistance remains incomplete, particularly for mutations  
385 outside of the drug target or drug activator and which typically confer low to intermediate, but clinically  
386 relevant, levels of acquired drug resistance (Carter, 2021; Colangeli et al., 2018; Hicks et al., 2020; Walker  
387 et al., 2015). Given the ability of our chemical-genetic approach to identify hit genes associated with  
388 clinically relevant acquired drug resistance (**Figure 1B-D**, **Figure 3B**), we hypothesized that mining our  
389 chemical-genetic data may identify prevalent but previously unrecognized mechanisms of acquired drug  
390 resistance in Mtb.

391

392 We chose to focus our search for novel sources of acquired drug resistance to streptomycin. Streptomycin  
393 was introduced into the clinic in the late 1940s and remained an integral component of first-line TB therapy  
394 into the 1980s. It is now reserved to treat MDR-TB (Cohen et al., 2020). Unlike linezolid, which has only  
395 recently been used in the clinical management of TB, streptomycin has been used for almost eight decades.  
396 We hypothesized that this may have given rise to a diverse set of acquired resistance mutations which we  
397 could identify in our database of clinical Mtb genomes.

398

399 Aminoglycosides like streptomycin must traverse the Mtb envelope to access their ribosomal targets in the  
400 cytoplasm. The mechanism(s) by which aminoglycosides are taken up by mycobacteria are not well  
401 understood. Interestingly, and consistent with prior work (Domenech et al., 2009), the strongest hit gene  
402 leading to streptomycin resistance in our screen was *rv1819c* (*bacA*; **Figure 3B,C**). Recently, structural and  
403 biochemical work demonstrated that *bacA* is an ABC importer of diverse hydrophilic solutes (Rempel et al.,  
404 2020). Thus, we hypothesized that *bacA* may serve as an importer of streptomycin into the Mtb cytosol and  
405 that LOF mutations in *bacA* may be an unrecognized source of streptomycin resistance in clinical Mtb  
406 strains.

407

408 Searching our clinical strain genome database, we observed numerous *bacA* non-synonymous single  
409 nucleotide polymorphisms (SNPs) and small insertion-deletions (indels) and chose six for experimental  
410 validation (see *Materials and Methods* for more detail on SNP selection criteria; **Figure 4A**; **Supplemental**  
411 **Data 6**). Each mutation was introduced into a *bacA* expressing plasmid and transformed into a *bacA*  
412 deletion Mtb strain. Consistent with *bacA* LOF, four of the six alleles displayed an elevated streptomycin  
413 MIC (**Figure 4B**). Interestingly, these strains also showed elevated MICs to the other aminoglycosides  
414 amikacin and kanamycin and the tuberactinomycin capreomycin but not to other drugs (**Figure 4B**;  
415 **Supplemental Figure 7A**). Moreover, overexpression of Mtb *bacA* in *M. smegmatis* sensitized *M.*  
416 *smegmatis* to streptomycin but not rifampicin or linezolid (**Supplemental Figure 7B**). While further studies  
417 are necessary to definitively demonstrate that *bacA* is an importer of aminoglycosides and  
418 tuberactinomycins, our data, in combination with prior studies (Domenech et al., 2009; Rempel et al., 2020),  
419 strongly suggest that BacA imports these hydrophilic drugs (**Supplemental Figure 7C**) into the Mtb cytosol.  
420 Importantly, since a *bacA* deletion strain is not entirely resistant to aminoglycosides and tuberactinomycins,  
421 other relevant import mechanisms must exist in Mtb. These results demonstrate that our chemical genetic  
422 screens paired with clinical strain genomics can identify novel acquired drug resistance mutations in Mtb.

423

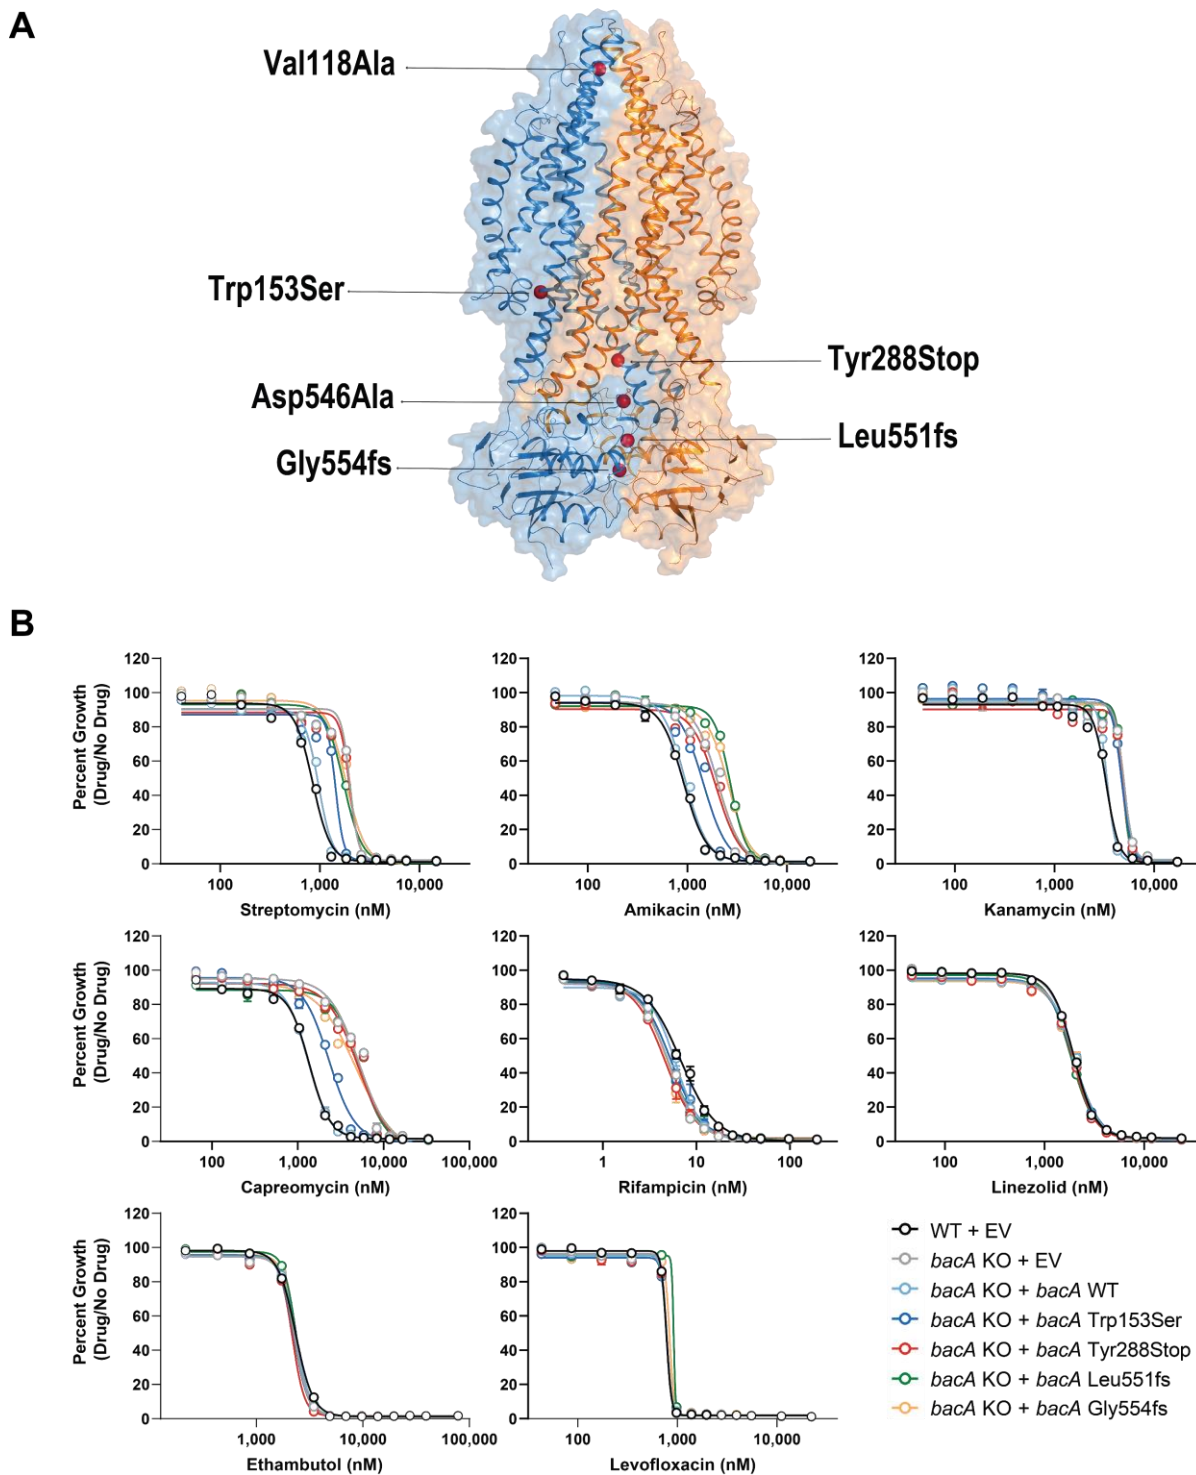

**Figure 4: Loss-of-function mutations in *bacA* confer clinically relevant resistance to aminoglycosides and capreomycin**

(A) Structure of *bacA* (PDB: 6TQF) (Rempel et al., 2020). Red spheres mark sites of experimentally tested clinical strain mutations in (C).

(B) Drug resistance phenotypes for strains harboring *bacA* mutations. MIC values for the indicated drugs were measured for the indicated strains. Data represent mean  $\pm$  SEM for technical triplicates. Results are representative data from at least two independent experiments.

424  
425  
426  
427  
428  
429  
430  
431  
432  
433  
434  
435

## 436 **Partial loss-of-function mutations in *ettA* confer clinically relevant, low-level, acquired multidrug** 437 **resistance**

438  
439 Another one of the strongest streptomycin resistance hits leading in our screen was *rv2477c*, which also  
440 showed low-level resistance to other drugs (**Figure 3B; Supplemental Data 1**). *rv2477c* is an ortholog of  
441 the *E. coli* gene *ettA* (~58% amino acid identity), a ribosome-associated ABC-F protein that regulates the  
442 translation elongation cycle (Boël et al., 2014; Chen et al., 2013) (**Figure 3C, Figure 5A**). Due to its  
443 sequence similarity, we will refer to *rv2477c* as *ettA*. Biochemical studies demonstrated that ATP-bound  
444 EttA from *E. coli* stimulates formation of the first peptide bond of the initiating ribosome and then,  
445 concomitant with ATP hydrolysis, dissociates from the ribosome to allow translation elongation (Boël et al.,  
446 2014; Chen et al., 2013). Unlike *ettA* in *E. coli*, *ettA* is essential for the *in vitro* growth of Mtb (Bosch et al.,  
447 2021).

448  
449 Using our clinical Mtb strain genome database, we identified four non-synonymous SNPs as being located  
450 within motifs predicted to be important for EttA function (**Figure 5A**) and/or showed evidence for enrichment  
451 in genotypically predicted drug resistant Mtb strains (**Supplemental Data 7**). Lastly, we also included an  
452 *ettA* Trp135Gly mutation that was identified in serial Mtb isolates from a patient in Thailand. This Trp135Gly  
453 mutation was observed directly preceding the transition from MDR-TB to extensively drug-resistant (XDR)  
454 TB (Faksri et al., 2016). Candidate SNPs (**Figure 5A**) were incorporated into a CRISPRi-resistant *ettA* allele  
455 and transformed into an H37Rv strain that allowed selective CRISPRi silencing of the endogenous, wild-  
456 type *ettA* allele. All SNPs tested were capable of complementing knockdown of the endogenous *ettA* allele  
457 (**Figure 5B**). Both the Gly41Glu and Trp135Gly variants displayed a modest growth defect (**Figure 5B;**  
458 **Supplemental Figure 8A**), suggesting that these two SNPs are partial loss-of-function mutations.  
459 Consistent with a role for these *ettA* SNPs in conferring acquired drug resistance, four out of the five  
460 variants showed an increased MIC for streptomycin (**Figure 5C**). The Gly41Glu and Trp135Gly strains  
461 showed a >5-fold shift in IC<sub>50</sub>, similar in magnitude to *gid* mutants (Wong et al., 2011). Additionally, the  
462 Gly41Glu and Trp135Gly mutants showed low-level resistance to a mechanistically diverse panel of  
463 antibiotics including amikacin, ethambutol, rifampicin, and levofloxacin, but not other tested drugs (**Figure**  
464 **5C; Supplemental Figure 8C,D**).

465  
466 To determine the mechanism by which *ettA* SNPs may confer low-level, acquired multidrug resistance, we  
467 analyzed the *M. smegmatis* proteome after silencing the *ettA* homolog, *ms4700*. Two of the most  
468 upregulated proteins upon *ms4700* knockdown were HflX (Ms2736) and Eis (Ms3513) (**Supplemental**  
469 **Figure 8E**) (Bosch et al., 2021), encoded by two genes known to be part of the *whiB7* regulon in Mtb  
470 (Morris et al., 2005). Thus, we hypothesized that partial loss of function *ettA* alleles may promote low-level,  
471 acquired multidrug resistance by stalling translation and constitutively upregulating the *whiB7* stress  
472 response— in essence, *ettA* mutations mimic the effects of translation stress caused by ribosome inhibitors  
473 to activate *whiB7* (Schrader et al., 2021). Consistent with this hypothesis, *whiB7* and known regulon genes  
474 (Morris et al., 2005) were constitutively upregulated in the *ettA* Gly41Glu Mtb mutant (**Figure 5D**).  
475 Furthermore, simultaneous knockdown of *whiB7* was able to reverse aminoglycoside resistance conferred  
476 by knockdown of *ettA* (**Figure 5E**). This effect was drug-specific, with knockdown of the efflux pump *tap*  
477 specifically reversing streptomycin resistance and knockdown of the acetyltransferase *eis* specifically  
478 reversing amikacin resistance (Liu et al., 2019; Zaunbrecher et al., 2009). Interestingly, knockdown of *whiB7*  
479 did not reverse ethambutol or levofloxacin resistance, suggesting that the mechanism by which *ettA*  
480 mutations confer resistance to those drugs is independent of *whiB7*.

481  
482 Further epidemiological analysis focused on *ettA* Gly41Glu, the most common *ettA* SNP in our database  
483 (n=291, ~0.7% of all Mtb strains). Phylogenetic analysis shows that this cluster of related strains is heavily  
484 enriched for additional acquired drug resistance mutations (**Figure 5F, Supplemental Data 7**). Molecular  
485 epidemiology shows that *ettA* Gly41Glu strains are found in Spain, Italy, the United States (Couvin et al.,  
486 2019), but are concentrated in Peru (Sheen et al., 2013) and indigenous communities of Colombia (Marín et  
487 al., 2021), where they are driving a MDR-TB outbreak (**Figure 5F**).

488  
489

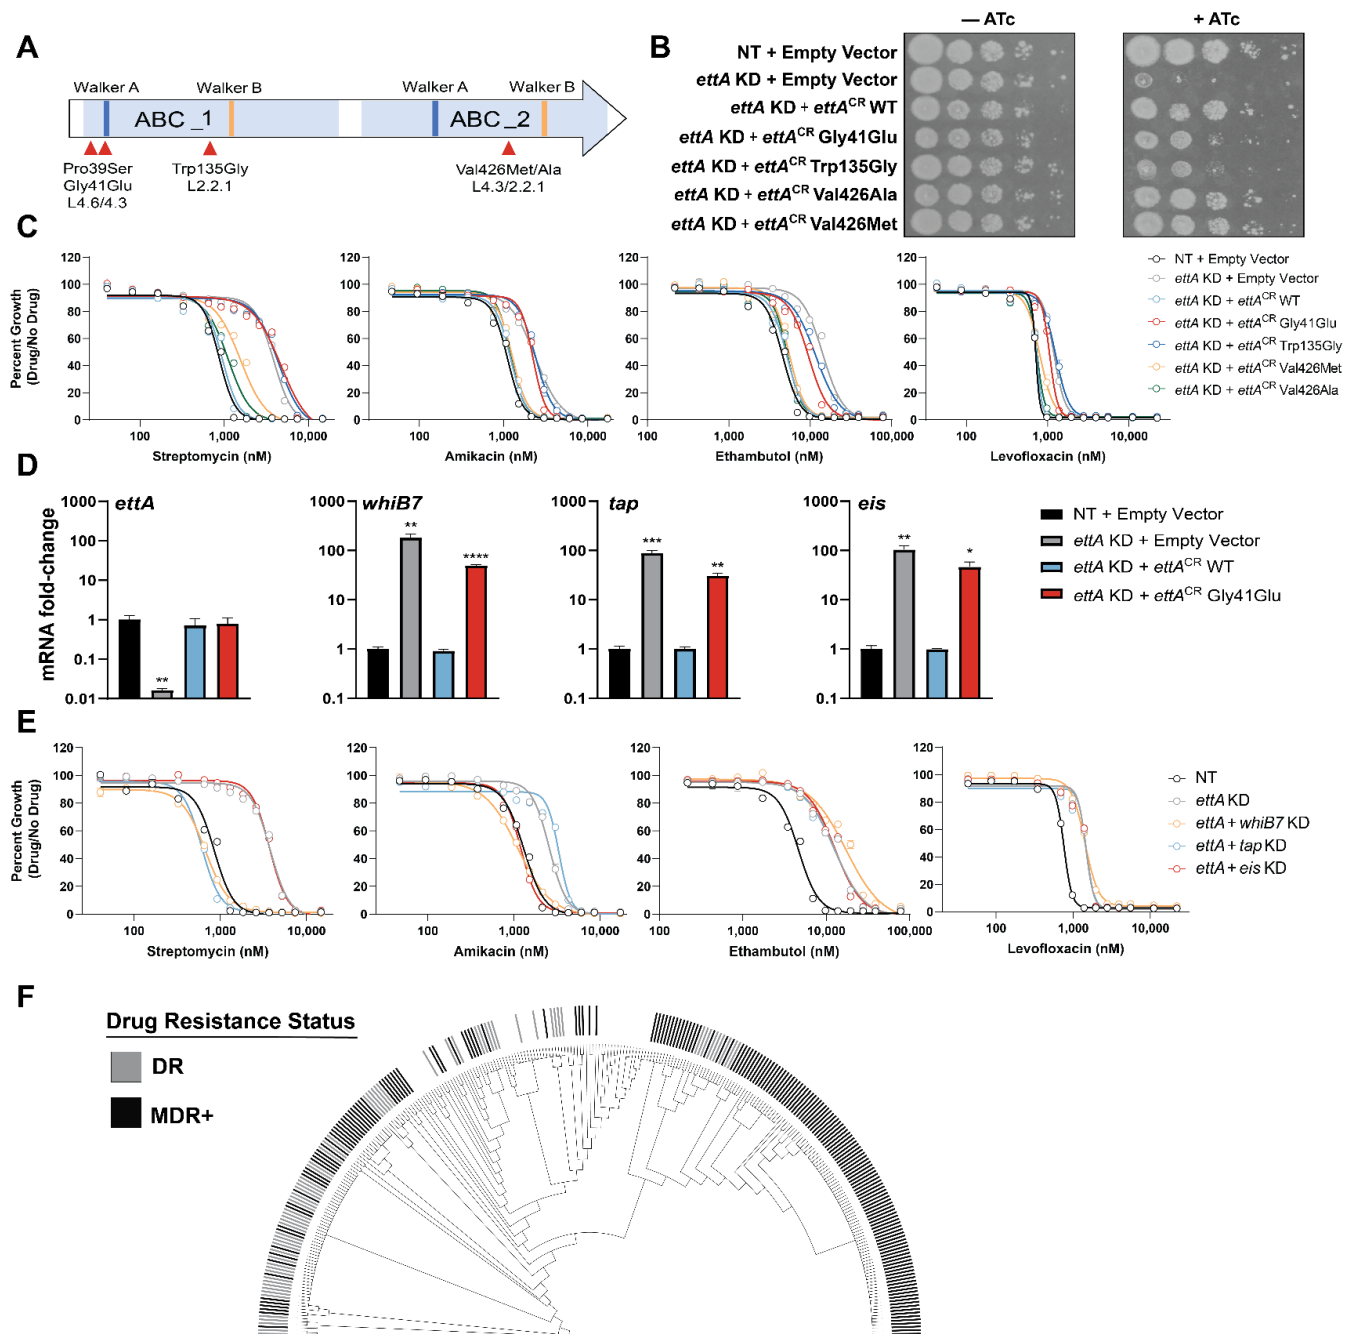

**Figure 5: Partial loss-of-function mutations in *ettA* upregulate the *whiB7* stress response and confer low-level, acquired, multidrug resistance**

- (A) Domain organization of EttA. ABC domains are highlighted in light blue. Walker A and Walker B motifs are shown in dark blue and orange, respectively. SNPs observed in clinical Mtb isolates that were experimentally tested are highlighted with red arrows and the dominant lineage (L) in which that SNP is found is indicated.
- (B) Growth of *ettA* mutant and control strains. The *ettA* CRISPRi strain was complemented with an empty vector or CRISPRi-resistant alleles harboring the indicated SNPs. NT = non-targeting; WT = wild-type; KD = knockdown; CR = CRISPRi-resistant.
- (C) Drug resistance phenotypes for strains harboring *ettA* SNPs. MIC values for the indicated drugs were measured for the strains shown in **Figure 5B**. Data represent mean  $\pm$  SEM for technical triplicates. Results are representative data from at least two independent experiments.

490  
 491  
 492  
 493  
 494  
 495  
 496  
 497  
 498  
 499  
 500  
 501  
 502  
 503  
 504

- 505 (D) Quantification of indicated gene mRNA levels by qRT-PCR. Strains were grown in the presence of  
506 ATc for ~5 generations prior to harvesting RNA. Error bars are SEM of three technical replicates.  
507 Statistical significance was calculated as p-value with Student's t-test. \*, p<0.05; \*\*, p<0.01; \*\*\*,  
508 p<0.001, \*\*\*\*, p<0.0001.
- 509 (E) MIC values for the indicated drugs were measured for *ettA* single and dual knockdown strains. Data  
510 represent mean  $\pm$  SEM for technical triplicates. NT = non-targeting.
- 511 (F) Phylogenetic tree of 291 Mtb clinical strains harboring the *ettA* Gly41Glu variant (**Supplemental Data**  
512 **7**). Genotypically predicted drug-resistance status are shown. DR = resistance-conferring SNPs to  
513 RIF, INH, PZA, or EMB present; MDR+ = resistance-conferring SNPs to a minimum of RIF and INH.

514  
515

### 516 **A loss-of-function mutation in *whiB7* renders an endemic Indo-Oceanic clade of *M. tuberculosis*** 517 **hypersusceptible to macrolides**

518

519 Since partial loss of *ettA* function appears to confer acquired drug resistance by constitutive activation of  
520 *whiB7*, we next mined our clinical strain genome database to identify putative gain-of-function *whiB7*  
521 mutations that may be associated with acquired drug resistance (Reeves et al., 2013). We identified  
522 numerous putative gain-of-function mutations in the *whiB7* promoter, 5'UTR, and upstream ORF (uORF),  
523 most of which have not been previously recognized as potential determinants of acquired drug resistance  
524 (**Figure 6A; Supplemental Data 7**) (Chakravorty et al., 2015; Kaur et al., 2016; Reeves et al., 2013).  
525 Unexpectedly, however, the most common *whiB7* variant in our database was a putative loss-of-function  
526 allele. This allele, Gly64delG, harbors a single nucleotide deletion at codon Gly64 and represents nearly  
527 one-third (n=851/3,186) of all *whiB7* variants in our database (**Figure 6A**) (Merker et al., 2020; Vargas et al.,  
528 2021; Warit, 2015). The Gly64delG frameshift results in a premature stop codon and truncation of the  
529 critical DNA binding AT-hook element (**Supplemental Figure 9A**) (Burian et al., 2013), thus presumably  
530 rendering WhiB7 inactive in these strains. *whiB7*-mediated intrinsic drug resistance typically renders  
531 macrolides ineffective to treat TB. We next sought to explore the possibility that the common Gly64delG  
532 mutation may render this subset of Mtb strains hypersusceptible to and treatable with macrolides.

533

534 Lineage calling identified the Gly64delG SNP as uniquely present in all lineage 1.2.1 (L1.2.1) Mtb isolates, a  
535 major sublineage of the L1 Indo-Oceanic clade (**Figure 6A; Supplemental Figure 9B; Supplemental Data**  
536 **8**) (Netikul et al., 2021). Using a reference set of Mtb clinical strains (Borrell et al., 2019), we first validated  
537 the presence of the *whiB7* Gly64delG frameshift mutation in L1.2.1 by Sanger sequencing (**Figure 6B**). All  
538 other clinical isolates in this set were wild-type for *whiB7*. Consistent with loss of *whiB7* function, the L1.2.1  
539 isolate was hypersusceptible to clarithromycin as well as other macrolides, ketolides, and lincosamides,  
540 whereas all other clinical isolates were intrinsically resistant (**Figure 6C; Supplemental Figure 9C-E**). The  
541 *whiB7* Gly64delG allele failed to complement intrinsic clarithromycin resistance in an H37Rv  $\Delta$ *whiB7*  
542 knockout strain, confirming that Gly64delG is a loss-of-function allele (**Supplemental Figure 9F**). To  
543 confirm L1.2.1 macrolide susceptibility *in vivo*, we infected mice with H37Rv or L1.2.1 Mtb by low-dose  
544 aerosol exposure. Both strains showed similar growth kinetics *in vivo* (**Supplemental Figure 10A,B**). We  
545 next tested drug efficacy in an acute infection model, with drug dosing designed to mimic human  
546 pharmacokinetics in the treatment of TB (rifampicin, isoniazid) and non-tuberculous mycobacteria  
547 (clarithromycin) (Rodvold, 1999). We isolated a spontaneous clarithromycin resistant L1.2.1 isolate  
548 (harboring a 23S A2297G mutation) as a control (**Supplemental Figure 10C-E**). Consistent with the *in vitro*  
549 data, L1.2.1 was sensitive to macrolide therapy whereas H37Rv was intrinsically resistant (**Figure 6D,E;**  
550 **Supplemental Figure 10F-I**) (Luna-Herrera et al., 1995; Truffot-Pernot et al., 1995). Therapeutic drug  
551 monitoring confirmed equivalent drug exposures in both the H37Rv and L1.2.1 infections (**Supplemental**  
552 **Figure 10J,K**). Interestingly, L1.2.1 was also more sensitive than H37Rv to rifampicin in the mouse model  
553 (**Supplemental Figure 10H,I**), which could reflect *whiB7*-dependent upregulation of the tap efflux pump in  
554 H37Rv but not L1.2.1 during induced tolerance *in vivo* (Adams et al., 2011)

555

556 To estimate the potential clinical impact of this finding, we next examined the geographic distribution of the  
557 L1.2.1 sublineage. This sublineage is found predominantly in Southeast Asia, including the high TB burden  
558 countries Indonesia, Thailand, and the Philippines (**Figure 6F,G**) (Palittapongarnpim et al., 2018). L1.2.1 is  
559 particularly prevalent in the Philippines, accounting for approximately 80% of all Mtb isolates in this country

560 (Phelan et al., 2019). Of note, the Philippines has one of the highest TB incidence rates in the world,  
 561 including a high burden of drug-resistant TB, and TB is a leading cause of death in this country (WHO,  
 562 2021). A recent analysis of the global burden of TB caused by L1.2.1 estimates that this sublineage causes  
 563 approximately 600,000 cases of active TB per year (Netikul et al., 2021), of which ~43,000 are estimated to  
 564 be MDR-TB based on the frequencies of drug resistance in our clinical strain genome database. Thus,  
 565 clarithromycin, an effective, orally available, safe, and generic antibiotic, could potentially be repurposed to  
 566 treat a major sublineage of TB.  
 567  
 568

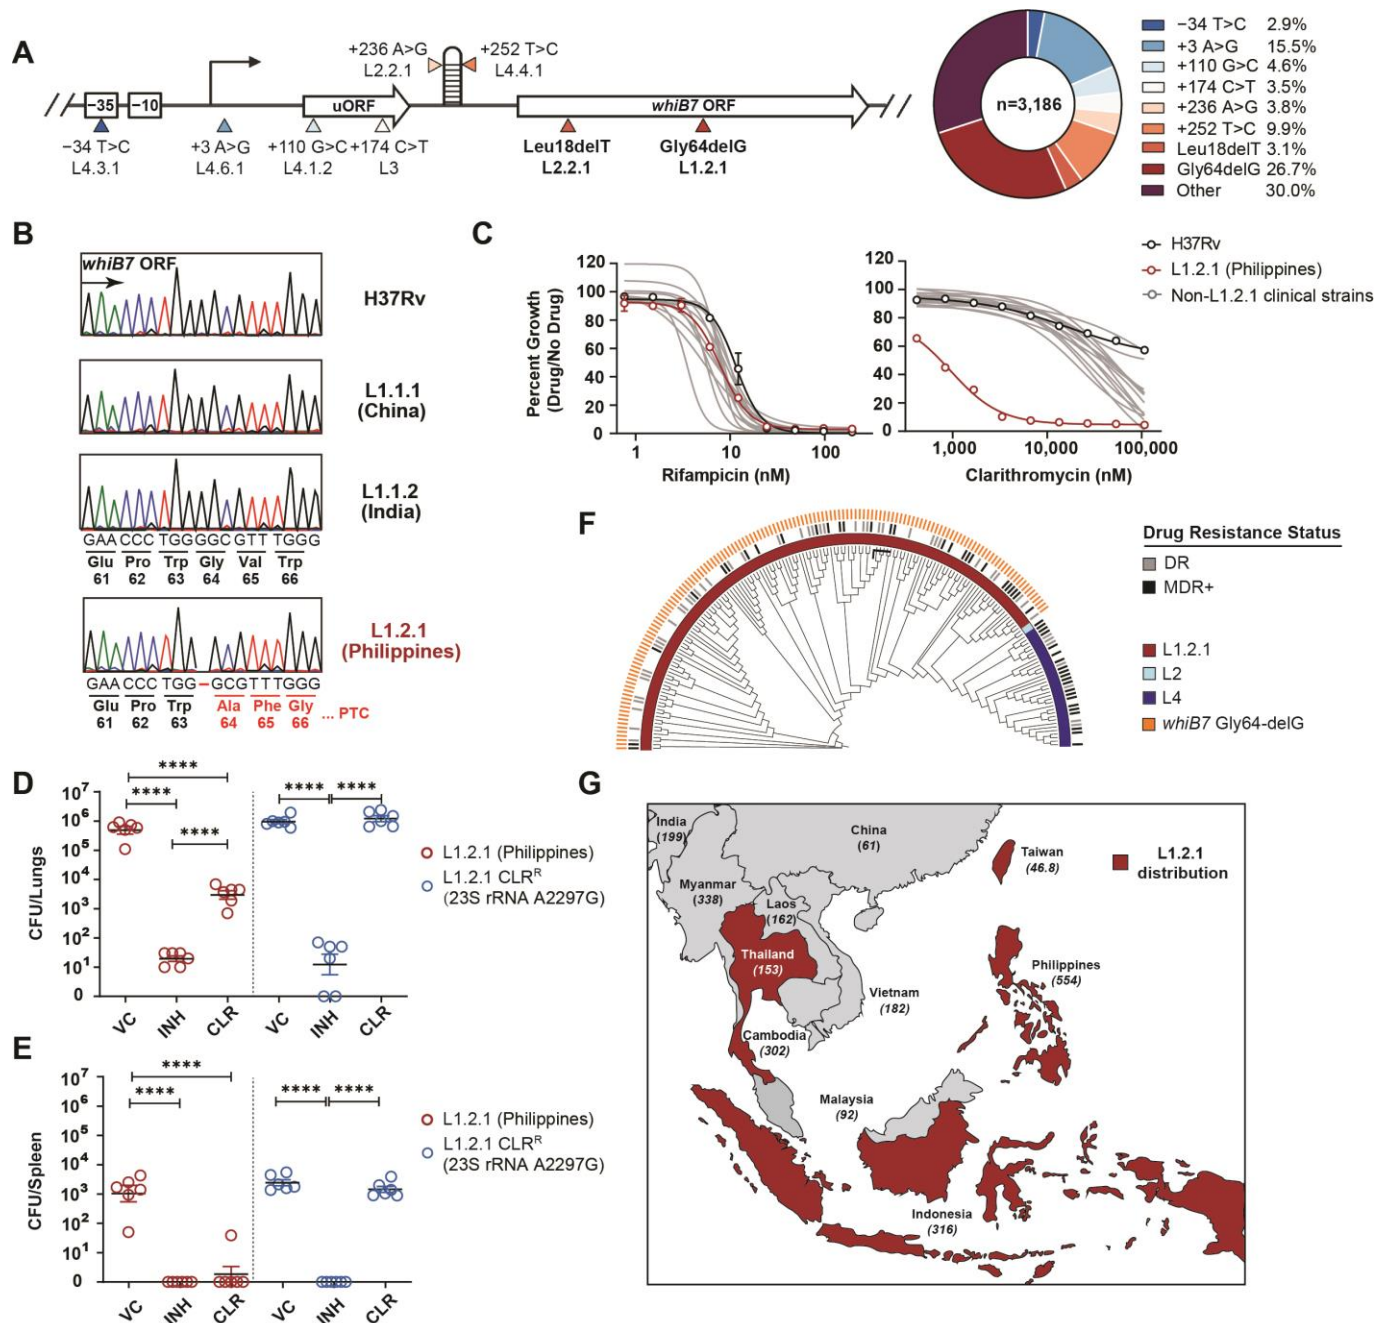

569  
 570  
 571  
 572  
 573  
 574  
 575  
 576

**Figure 6: A loss-of-function mutation in *whiB7* renders an endemic Indo-Oceanic lineage of *M. tuberculosis* hypersusceptible to macrolides.**

(A) Diagram of *Mtb whiB7*. The eight most common *whiB7* variants observed in our *Mtb* clinical strain genome database are highlighted with arrows and the dominant lineage (L) in which those SNPs are found is indicated. The pie chart depicts the observed frequencies of each indicated variant in our database.



- 577 (B) Sanger sequencing traces of *whiB7* from the indicated Mtb clinical strains and their country of origin.  
578 PTC = premature termination codon.
- 579 (C) MIC values for RIF and CLR were measured for a reference set of Mtb clinical strains. Error bars  
580 represent the standard error of the mean (SEM) for technical triplicates. Results are representative  
581 data from at least two independent experiments.
- 582 (D,E) Mean lung (D) and spleen (E) Mtb CFU ( $\pm$  SEM) in BALB/c mice after isoniazid (INH; 25 mg/kg), or  
583 clarithromycin (CLR; 200 mg/kg) treatment. Mice were infected with approximately 100-200 CFU of  
584 aerosolized Mtb. After 10 days to allow the acute infection to establish, chemotherapy was initiated.  
585 Following 24 days of drug therapy, Mtb bacterial load of lungs and spleen were determined. Statistical  
586 significance was assessed by one-way ANOVA followed by Tukey's post-hoc test. \*\*\*\*,  $p < 0.0001$ . VC  
587 = vehicle control. CLR<sup>R</sup> = clarithromycin-resistant.
- 588 (F) Phylogenetic tree of 178 Mtb clinical strains isolated during the 2012 nationwide drug resistance  
589 survey in the Philippines (Phelan et al., 2019) (**Supplemental Data 8**). The presence of the *whiB7*  
590 Gly64delG mutation and genotypically predicted drug resistance status are shown. DR = resistance-  
591 conferring SNPs to RIF, INH, PZA, or EMB present; MDR+ = resistance-conferring SNPs to a  
592 minimum of RIF and INH.
- 593 (G) Map showing the distribution of the L1.2.1 sub-lineage in Southeast Asia (WHO, 2021). Tuberculosis  
594 incidence rates are listed in parentheses beneath each country name.

## 595 596 597 **DISCUSSION**

598  
599 A deeper understanding of the bacterial pathways that govern drug efficacy in Mtb is needed to develop  
600 more potent therapies, identify new mechanisms of acquired drug resistance, and reveal overlooked  
601 therapeutic opportunities. To address this challenge, we developed a CRISPRi platform to define the  
602 genetic determinants that alter bacterial fitness in the presence of different drugs, and then overlay these  
603 chemical-genetic results with comparative genomics of Mtb clinical isolates. Illustrating the power of this  
604 dataset to derive new, clinically relevant biological insight, we uncover diverse mechanisms of intrinsic drug  
605 resistance that can be targeted to potentiate therapy, describe new mechanisms of acquired drug  
606 resistance associated with the emergence of MDR-TB, and make the unexpected discovery of an “acquired  
607 drug sensitivity” that could enable the repurposing of clarithromycin to treat an Mtb sublineage.

608  
609 Alternative functional-genomics methods such as TnSeq have been successfully applied to generate  
610 chemical-genetic interaction profiles for a number of drugs in Mtb (Sasseti et al., 2020; Xu et al., 2017).  
611 While powerful, TnSeq as currently implemented in Mtb is restricted to the analysis of *in vitro* non-essential  
612 genes and thus cannot assess some of the most compelling drug targets, essential genes. The recent  
613 development of barcoded degron libraries in Mtb, in which regulated proteolysis is used to tune target  
614 protein levels, now allows the chemical-genetic assessment of hundreds of essential genes (Johnson et al.,  
615 2019; Koh et al., 2021). This approach is likely to be expanded to include nearly all essential genes in the  
616 near future. The degron library has been used to identify numerous new inhibitor-target pairs in large-scale,  
617 target-based whole cell screens. The degron approach is extremely powerful but suffers from the fact that  
618 not all proteins tolerate the degron tag, the approach fails to assess chemical-genetic interactions for non-  
619 essential genes, and the laborious nature of mutant construction functionally restricts analysis to a single  
620 Mtb reference strain (H37Rv). By being able to robustly tune knockdown for both essential and non-  
621 essential genes, the CRISPRi approach taken here provides the most comprehensive chemical-genetic  
622 map available, successfully generating distinct profiles for two translation inhibitors that bind within  
623 angstroms of each other. Moreover, the portability of CRISPRi libraries will allow chemical-genetic  
624 screening across diverse Mtb clinical isolates (Bosch et al., 2021). While more comprehensive and portable,  
625 our current CRISPRi approach is low throughput compared to degron libraries, and thus the development of  
626 optimized, compact CRISPRi libraries to increase screen throughput remains a priority. CRISPRi has well-  
627 known limitations (Bosch et al., 2021), including the polar effect of CRISPRi knockdown. As with any  
628 genetic approach, genetic inhibition of a target is not the same as inhibition of a target with a small molecule  
629 (Knight and Shokat, 2007), highlighting the importance of validating chemical-genetic interactions with small  
630 molecule inhibitors (Cokol et al., 2017). Lastly, any pooled screening approach may miss effects where the

631 phenotype can be complemented *in trans* (e.g. cross-feeding), although recent TnSeq results suggest that  
632 only 1-3% of all *S. pneumoniae* Tn mutants show differential fitness phenotypes when grown as pools vs in  
633 isolation, suggesting this type of phenotypic masking is rare (Thibault et al., 2019).  
634

635 One proposed route to improving TB chemotherapy is to develop more potent drug combinations by  
636 leveraging drug synergies (Cokol et al., 2017). By identifying hundreds of genes that contribute to intrinsic  
637 drug resistance in Mtb, the results presented here can be used to inform drug development efforts to  
638 identify synergistic drug combinations that disarm intrinsic drug resistance. Our results confirm that one of  
639 the richest sources of potentially synergistic targets is the mycobacterial envelope, consistent with the long-  
640 appreciated understanding of the envelope as a barrier to antibiotic efficacy (Batt et al., 2020; Jarlier and  
641 Nikaido, 1994; Xu et al., 2017). mAGP disruption may increase envelope permeability and antibacterial  
642 uptake (McNeil et al., 2019; Piddock et al., 2000), as confirmed for *kasA* and *mtrAB*; alternatively, the  
643 chemical-genetic results may indicate a more mechanism-specific interaction, whereby knockdown of  
644 mAGP biosynthetic or regulatory genes is synthetic lethal with subinhibitory concentrations of an  
645 antibacterial compound (Xu et al., 2017). It is tempting to speculate that potentiation of rifampicin could, at  
646 least in part, explain the clinical success of ethambutol. Long-thought to be included in the standard  
647 regimen primarily to minimize the emergence of drug resistance to isoniazid, pyrazinamide, and rifampicin  
648 (Zimmerman et al., 2017), ethambutol may have “won” in early clinical trials due to its ability to effectively  
649 penetrate lung lesions (Zimmerman et al., 2017) and potentiate rifampicin (Cokol et al., 2017; Piddock et al.,  
650 2000). Chemical-genetic profiling of an expanded set of antibacterials to identify those compounds  
651 potentiated by mAGP disruption, or other types of molecules for which uptake can be monitored, may allow  
652 derivation of the permeability “rules” of the Mtb cell envelope, which could then be used to guide drug  
653 development to increase compound permeability (Davis et al., 2014).  
654

655 Beyond the Mtb cell envelope, our results uncover both shared and unique intrinsic resistance and  
656 sensitivity mechanisms, as highlighted by the chemical-genetic profiles for the three ribosome targeting  
657 antibiotics. Future biochemical studies will identify the molecular mechanisms by which these factors  
658 operate, knowledge which could then be used to guide medicinal chemistry efforts to improve these drugs.  
659 For example, aminoglycoside scaffolds could be designed to improve BacA-mediated uptake (Domenech et  
660 al., 2009; Rempel et al., 2020). Similarly, our results suggest that Rv1473 serves as an antibiotic resistance  
661 ABC-F protein, capable of displacing oxazolidinones and phenicols from the Mtb ribosome (**Supplemental  
662 Figure 6**). Next generation oxazolidinone analogs could be designed that are recalcitrant to the potential  
663 drug-displacing activity of Rv1473, analogous to the third-generation tetracycline analogues which are  
664 resistant to the drug-displacing activity of the ABC-F protein TetM (Jenner et al., 2013). In light of our  
665 findings, we suggest designating *rv1473* as *oprA* (**oxazolidinone phenicol resistance A**). Finally, these  
666 results show that trans-translation may be a target for synergistic drug combinations (Brunel et al., 2018),  
667 which could be important in increasing the potency and decreasing toxicity of oxazolidinones.  
668

669 In addition to guiding rational development of synergistic drug combinations, our results illustrate the power  
670 of combining chemical-genetics with comparative genomics to discover new mechanisms of acquired drug  
671 resistance. In recent decades, many drug resistance mutations in Mtb have been mapped and  
672 characterized. However, our knowledge of the genetic basis of acquired drug resistance remains  
673 incomplete, particularly for mutations outside of the drug target or drug activator and which typically confer  
674 low to intermediate levels of drug resistance (Carter, 2021; Hicks et al., 2018; Walker et al., 2015). Low-  
675 level drug resistance has been associated with TB treatment failure (Colangeli et al., 2018), and could serve  
676 as a stepping stone to allow additional, high-level drug resistance mutations to evolve (Dick and Dartois,  
677 2018). We make a number of findings that may be important for diagnosing and treating drug resistant TB.  
678 First, we show inhibition of *tsnR* increases fitness in the presence of linezolid, and thus mutations in this  
679 gene could be monitored as linezolid use is expanded in the clinic. Second, we find that LOF mutations in  
680 the ABC importer *bacA* confer resistance to four important second-line TB drugs: streptomycin, kanamycin,  
681 amikacin, and capreomycin. These mutations may be a source of unexplained resistance amongst clinical  
682 Mtb strains. Third, we show that partial loss-of-function mutations in the essential gene *ettA* result in  
683 constitutive activation of the *whiB7* stress response and low-level acquired multidrug resistance. This  
684 phenotype is consistent with the TB patient described in (Faksri et al., 2016), whereby serial Mtb isolates  
685 acquired a Trp135Gly mutation in *ettA* directly preceding the transition from MDR-TB to extensively drug-

686 resistant XDR-TB. 3.1% (n=1,393/45,473) of all Mtb strains in our genome database harbor a missense  
687 SNP in *ettA*, suggesting that *ettA*-mediated acquired drug resistance could be highly prevalent. Our focus  
688 on the *ettA*-Gly41Glu mutation shows that it is highly prevalent and that it likely facilitated the evolution of an  
689 MDR-TB outbreak concentrated in Peru, a country with one of the highest MDR-TB burdens in South  
690 America (WHO, 2021). Our results demonstrate that while streptomycin and amikacin may be less effective  
691 against *ettA* variants, capreomycin may remain effective and should be considered for treatment. In addition  
692 to *bacA* and *ettA*, our analytical pipeline revealed numerous additional genes as candidates for previously  
693 unrecognized mechanisms of acquired drug resistance in Mtb (**Supplemental Data 9**), although further  
694 work is necessary to validate these predictions. An increased understanding of acquired drug resistance will  
695 guide development of more effective molecular diagnostics and personalized TB therapy to reduce  
696 treatment failure and the subsequent evolution of additional resistance alleles.  
697

698 In the search for gain-of-function *whiB7* mutations that confer acquired drug resistance, we made the  
699 unexpected discovery of common loss-of-function *whiB7* alleles (Merker et al., 2020; Vargas et al., 2021),  
700 which we refer to as an “acquired drug sensitivity.” In addition to *whiB7*, we identified several predicted loss-  
701 of-function alleles in other genes that could confer acquired drug sensitivity in other Mtb clinical strains  
702 (**Supplementary Table 2**), and validate LOF alleles in a L1 and L7 isolate that confer hypersusceptibility to  
703 bedaquiline and the anti-leprosy drug clofazimine (**Supplemental Figure 11**) (Carter, 2021). Phylogenetic  
704 dating suggests that the *whiB7* mutation arose approximately 900 years ago, well before the introduction of  
705 TB chemotherapy (O’Neill et al., 2019). Since macrolides and lincosamides have not historically been used  
706 to treat TB, there has likely been little selective pressure against *whiB7* loss-of-function mutants. Whether  
707 the Gly64delG mutation provides or provided a selective benefit to L1.2.1 in Southeast Asia, enriched as a  
708 passenger mutation due to strong linkage disequilibrium in Mtb, enriched as a result of epistatic interactions  
709 with the L1.2.1 genotype that negate the selective benefit of the *whiB7* stress response, or was simply the  
710 product of genetic drift remains unclear. We find that the entire L1.2.1 Mtb sublineage (Merker et al., 2020)  
711 is a *whiB7* loss-of-function mutant which renders this strain susceptible to macrolides, both *in vitro* and *in*  
712 *vivo*. L1.2.1 could be identified by molecular diagnostics such as Genexpert (Walker et al., 2015). These  
713 results pave the way for further preclinical efficacy studies to support that clarithromycin be repurposed to  
714 treat this major Mtb sublineage (~600,000 active TB cases per year, ~43,000 MDR TB cases, 80% of all TB  
715 in the Philippines) in Southeast Asia.  
716

717 In summary, we combine genome-scale CRISPRi chemical-genetics and comparative genomics of Mtb  
718 clinical strains to define bacterial mechanisms that limit drug efficacy. This chemical-genetic map provides a  
719 rich resource to guide development of more potent drugs and drug combinations, identify previously  
720 unrecognized mechanisms of acquired drug resistance, and highlights overlooked therapeutic opportunities.  
721 Chemical-genetic profiling of antibacterials not traditionally used to treat TB may identify additional acquired  
722 drug sensitivities that could be leveraged to repurpose such drugs to treat TB. Profiling of lead compounds  
723 early in drug discovery, in addition to providing (or refuting) evidence for on-target activity (**Figure 1B-D**),  
724 may allow the identification of relevant bacterial intrinsic resistance mechanisms, knowledge which could  
725 then be used to modify the leads to evade intrinsic resistance (Lee et al., 2014). Future iterations of this  
726 approach should address additional bacterial mechanisms that contribute to treatment failure, including drug  
727 tolerance and persistence (Hicks et al., 2018). Moreover, it is well appreciated that chemical-genetic  
728 interactions can be strongly influenced by genetic background and growth environment (Bosch et al., 2021;  
729 Koh et al., 2021). This work sets the stage for expanded chemical-genetic studies in different Mtb clinical  
730 strains and different growth environments, including *in vivo* infection models.  
731

732  
733

## 733 ACKNOWLEDGEMENTS

734 We thank members of the Rock laboratory, Sabine Ehrt, Justin Pritchard, Alexandre Gouzy and Shipra  
735 Grover for comments on the manuscript and/or helpful discussions. We thank Carolina Trujillo, Josh  
736 Wallach, Sophie Lavalette-Levi, and Sabine Ehrt for technical assistance, Jenny Xiang and Dong Xu of the  
737 Weill Cornell Genomics Core for sequencing, the animal technical and analytical teams of the Center for  
738 Discovery and Innovation for animal work, and Sarah Schrader for sharing the *M. smegmatis whiB7*  
739 knockout strain. We thank Ruby Froom and Viviana LaSalle for scientific illustration. We thank Cliff Barry for  
740 kindly sharing the *bacA* deletion strain used in this work. This work was supported by a Harvey L. Karp

741 Postdoctoral Fellowship (S.L.), the Potts Memorial Foundation (M.D. and S.L.), the Bill and Melinda Gates  
742 Foundation (INV-010616 and INV-004761 to D.S.), the Department of Defense (PR192421 to J.R.), an NIH  
743 Shared Instrumentation Grant (S10-OD023524 to V.D.), and an NIH/NIAID New Innovator Award  
744 (1DP2AI144850-01, J.R.).

745

746

747 **AUTHOR CONTRIBUTIONS**

748 Conceptualization, S.L., N.C.P., N.R., D.S. and J.M.R.; Methodology, S.L., N.C.P., J.S.C., Z.A.A., M.A.D.,  
749 and J.M.R.; Investigation, S.L., N.C.P., N.R., M.D.Z., B.B., C. E., D.S., K.P., M.G. and K.R.; Validation: S.L.  
750 and N.C.P.; Software & Formal Analysis: J.S.C., M.A.D., Z.A.A. and K.E.; Data Curation: J.S.C., M.A.D.,  
751 Z.A.A., K.E. and J.M.R.; Writing – Original Draft, S.L., N.C.P. and J.M.R.; Writing – Review & Editing, S.L.,  
752 N.C.P., J.S.C., M.A.D., K.E., B.B., M.G., V.D., D.S. and J.M.R.; Funding Acquisition, V.D., D.S. and J.M.R.;  
753 Resources, M.D.Z., M.G., V.D.; Supervision, J.M.R.

754

755

756 **COMPETING INTEREST**

757 All authors declare no competing interests.

758  
759  
760

## Supplemental Figures

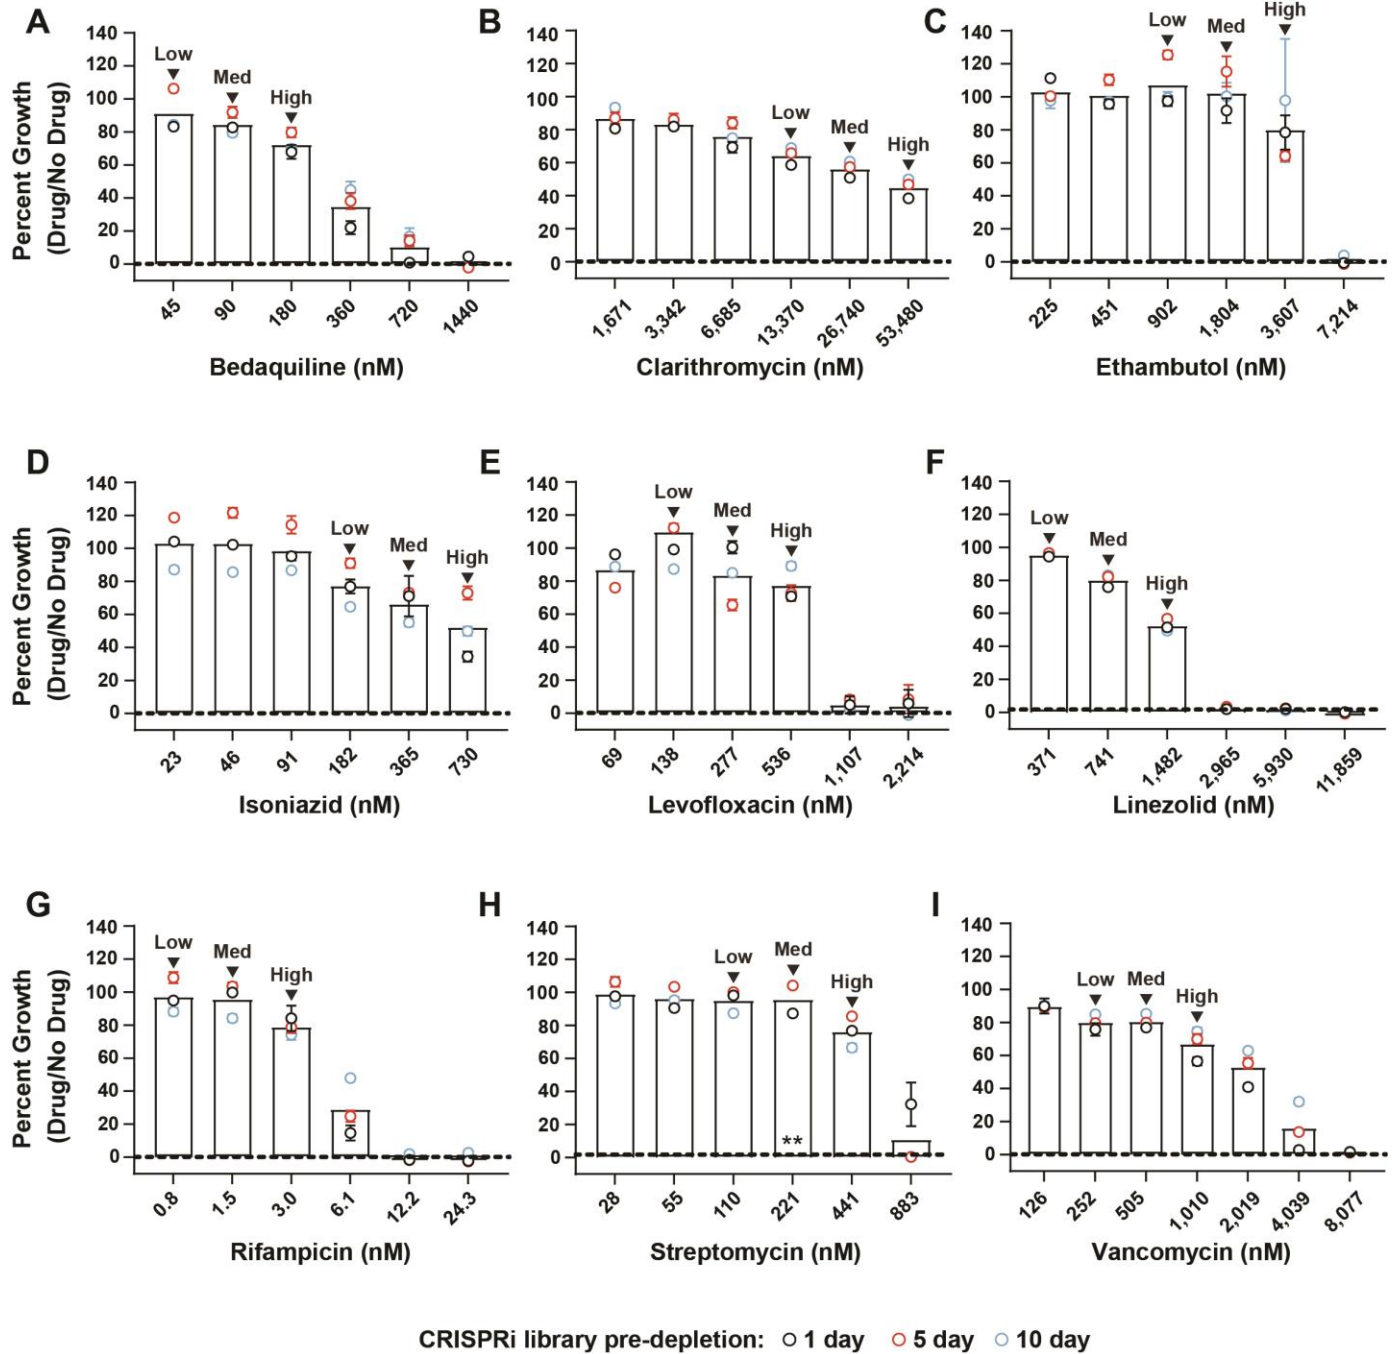

761  
762  
763  
764  
765  
766  
767  
  
768  
769  
770  
771  
772

### Supplemental Figure 1: Growth of the Mtb CRISPRi library during drug selection

(A-I) Normalized growth of the Mtb CRISPRi library in the drug screens. Error bars represent the SEM for biological triplicates. Samples harvested for sgRNA deep sequencing are marked as “High”, “Med”, and “Low”, denoting the three descending doses of partially inhibitory drug concentrations analyzed in these screens. \*\*: 10-day sample was lost for the 221 nM (“Med”) streptomycin screen.

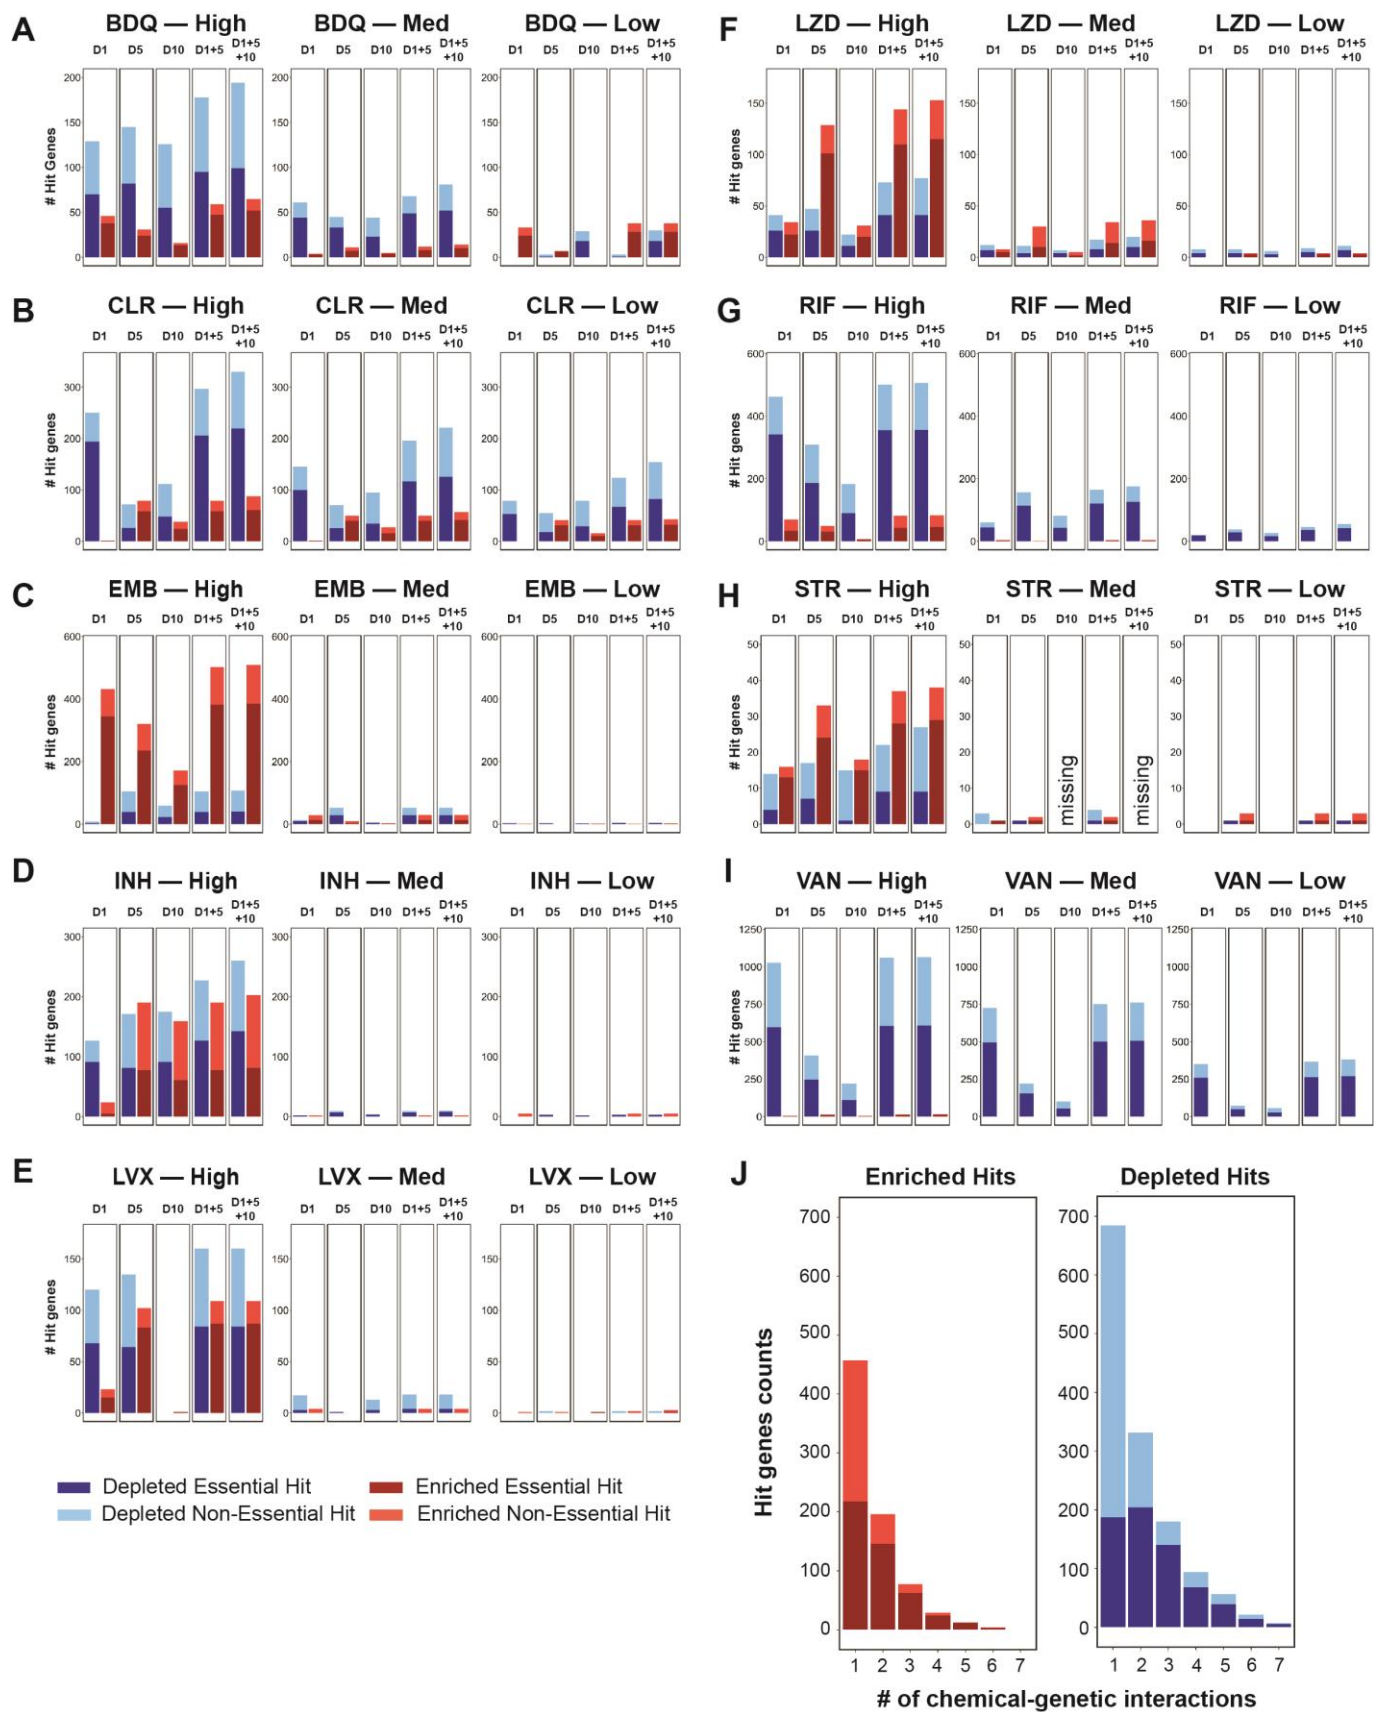

773  
774  
775  
776  
777  
778

### Supplemental Figure 2: Summary of hits from chemical-genetic screens

(A-I) Bar graphs showing number of hit genes identified across all conditions. Gene essentiality calls were defined by CRISPRi as in (Bosch et al., 2021). D1, D5, and D10 indicate the number of days the CRISPRi library was treated with ATc prior to drug exposure; D1+5 = hit genes defined as the union of

779 1 and 5-day CRISPRi library pre-depletion results; D1+5+10: hit genes defined as the union of 1, 5  
780 and 10 day CRISPRi library pre-depletion results. Note that the 10-day sample was lost for the “Med”  
781 streptomycin screen and thus the D10 containing results for “STR–Med” are labelled “missing”.  
782 (J) Histogram depicting the number of unique chemical-genetic interactions for enriching and depleting  
783 hits. Hit genes were defined as the union of 1 and 5-day CRISPRi library pre-depletion results.  
784

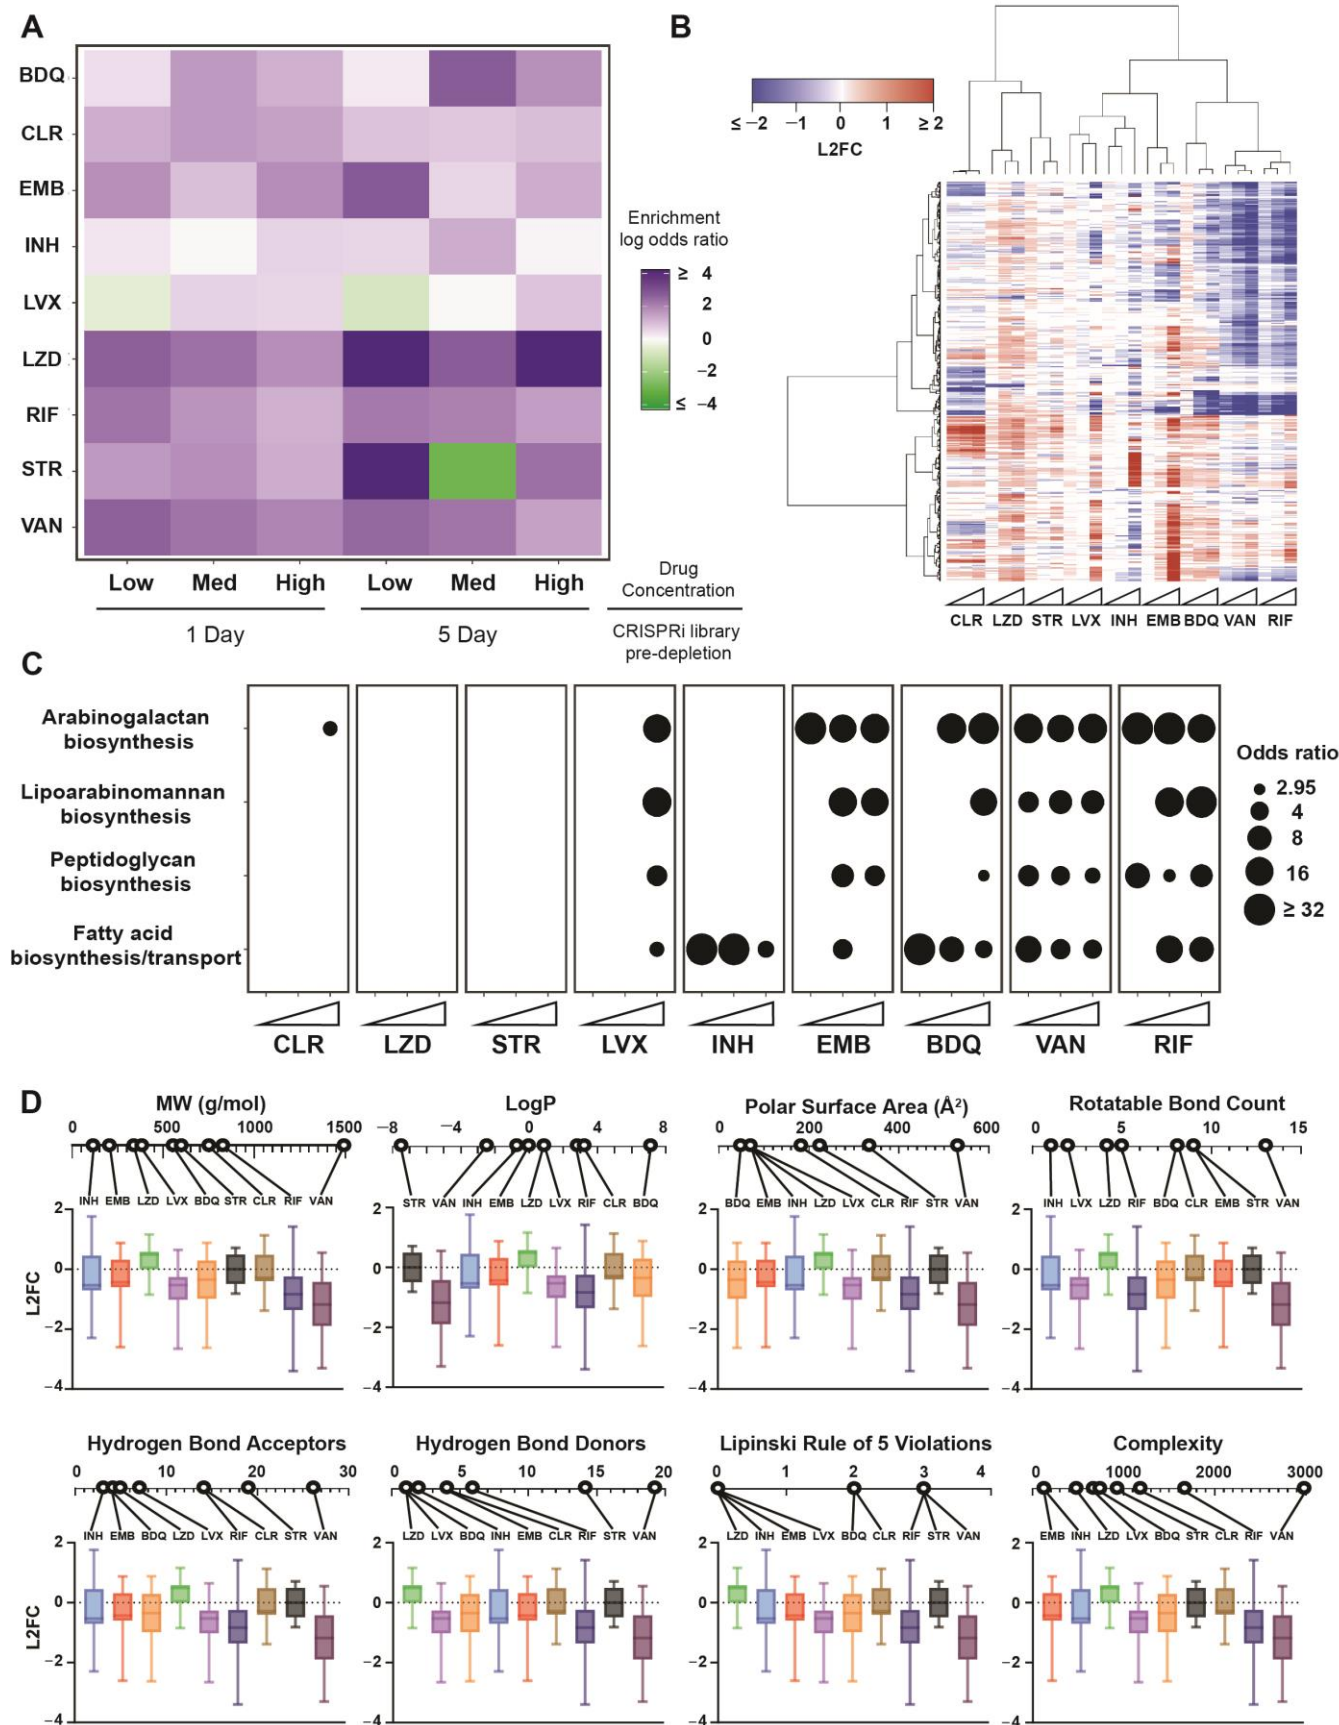

**Supplemental Figure 3: Clustering & enrichment analysis of chemical-genetic profiles**

(A) Heatmap of odds-ratios showing enrichment of essential gene targeting sgRNAs as hits in the chemical-genetic screen. A Fisher exact test was used to evaluate enrichment of essential gene

785  
786  
787  
788  
789



790 targeting sgRNAs relative to non-essential gene targeting sgRNAs amongst hit genes (FDR <0.01,  
791 |L2FC| > 1) in the chemical genetic screen.

792 (B) Heatmap showing clustered chemical-genetic profiles from the 5-day CRISPRi library pre-depletion  
793 screen. Genes are clustered along the vertical axis; for simplicity, only genes that hit in at least two  
794 drugs are shown (n=676 genes). Ascending drug concentrations (“Low”, “Med”, “High” indicated by  
795 white triangles) are clustered along the horizontal axis. The median L2FC for each gene following drug  
796 selection (relative to vehicle control) is indicated on the color scale. If a gene was not a significant hit  
797 (FDR > 0.01), the L2FC value was plotted as 0 for the corresponding condition. The full dataset is  
798 available in **Supplemental Data 1**.

799 (C) Bubble plot of the enriched (P < 0.05) KEGG categories for hit genes for the indicated drugs. KEGG  
800 annotations were manually updated to include the mycolic acid-arabinogalactan-peptidoglycan  
801 (mAGP) complex-associated genes described in (Jankute et al., 2015; Maitra et al., 2019).

802 (D) Correlation of mAGP signature and physiochemical properties. For each drug, the distribution of L2FC  
803 values (“High” concentration, 5-day CRISPRi library pre-depletion) is shown for a select group of 78  
804 genes involved in mAGP assembly and regulation as described in (Jankute et al., 2015; Maitra et al.,  
805 2019). In each plot the drugs are arranged based on their numerical value for each given  
806 physiochemical property.

807  
808  
809  
810  
811  
812  
813  
814  
815  
816  
817  
818  
819  
820  
821  
822  
823  
824  
825  
826  
827  
828  
829  
830  
831  
832  
833  
834  
835  
836  
837  
838  
839  
840

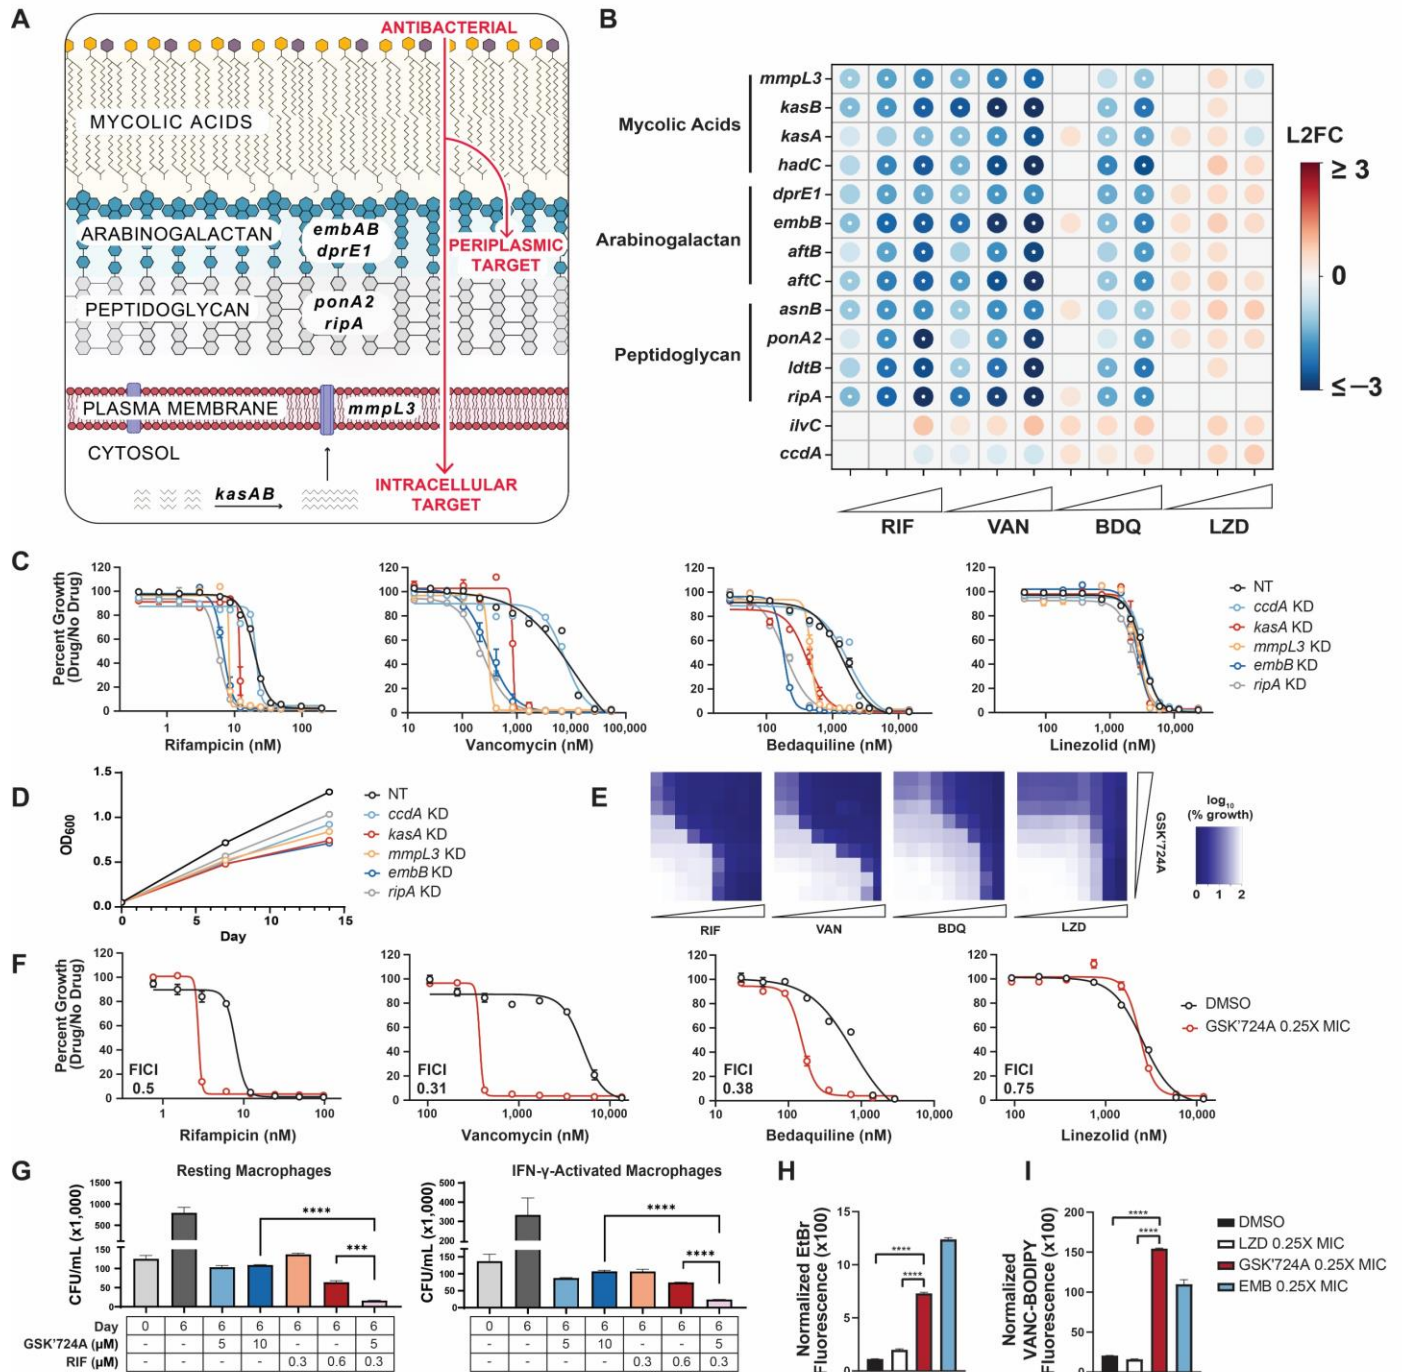

841  
842  
843  
844  
845  
846  
847  
848  
849  
850  
851  
852  
853  
854

### Supplemental Figure 4: The Mtb envelope mediates intrinsic resistance to a subset of drugs

- (A) Diagram of the mycobacterial mAGP complex. Select genes involved in mycolic acid synthesis and transport (*kasAB*, *mmpL3*), arabinogalactan biosynthesis (*embAB*, *dprE1*), and peptidoglycan remodeling (*ponA2*, *ripA*) are highlighted.
- (B) Feature-expression heatmap of select chemical-genetic hit genes for the indicated drugs from the 5-day CRISPRi library pre-depletion screen. The color of each circle represents the gene-level L2FC. A white dot represents an FDR < 0.01 and a |L2FC| > 1. *ilvC* and *ccdA* are included as non-hit controls.
- (C-D) Single strain validation of mAGP-associated hits. MIC values (C) for the indicated drugs were measured for hypomorphic CRISPRi strains targeting *kasA*, *mmpL3*, *embB*, *ripA*, and the non-hit essential gene *ccdA*. Growth curves (D) are derived from the vehicle control samples. NT corresponds to a CRISPRi strain harboring a non-targeting sgRNA. Data represent mean ± SEM for technical triplicates. Data are representative of at least two independent experiments. KD = knockdown.

855 (E-F) KasA inhibitor (GSK'724A) checkerboard assays to quantify drug-drug interactions. MIC curves are  
856 shown for each drug in the absence (DMSO) or presence of 0.25X MIC<sub>80</sub> GSK'724A. The fractional  
857 inhibitory concentration index (FICI) values listed represent the lowest value obtained from each  
858 checkerboard assay. Error bars represent the SEM for technical triplicates. Data are representative of  
859 at least two independent experiments.

860 (G) GSK'724A synergy with rifampicin in resting and IFN- $\gamma$ -activated murine bone marrow derived  
861 macrophages. Mtb-infected macrophages were treated with the indicated concentrations of GSK'724A  
862 or rifampicin for 6 days prior to plating for colony forming units (CFU). Data represent mean  $\pm$  SEM for  
863 technical triplicates. Results from an unpaired t-test are shown: \*\*\*,  $p < 0.001$ , \*\*\*\*,  $p < 0.0001$ . Data  
864 are representative of two independent experiments.

865 (H-I) Ethidium bromide (H) and Vancomycin-BODIPY (I) uptake of H37Rv pre-treated for two days with  
866 DMSO or subinhibitory linezolid, GSK'724A, or ethambutol. Data represent mean  $\pm$  SEM for 4  
867 replicates. Results from an unpaired t-test are shown: \*\*\*\*,  $p < 0.0001$ .

868  
869  
870  
871  
872  
873

874

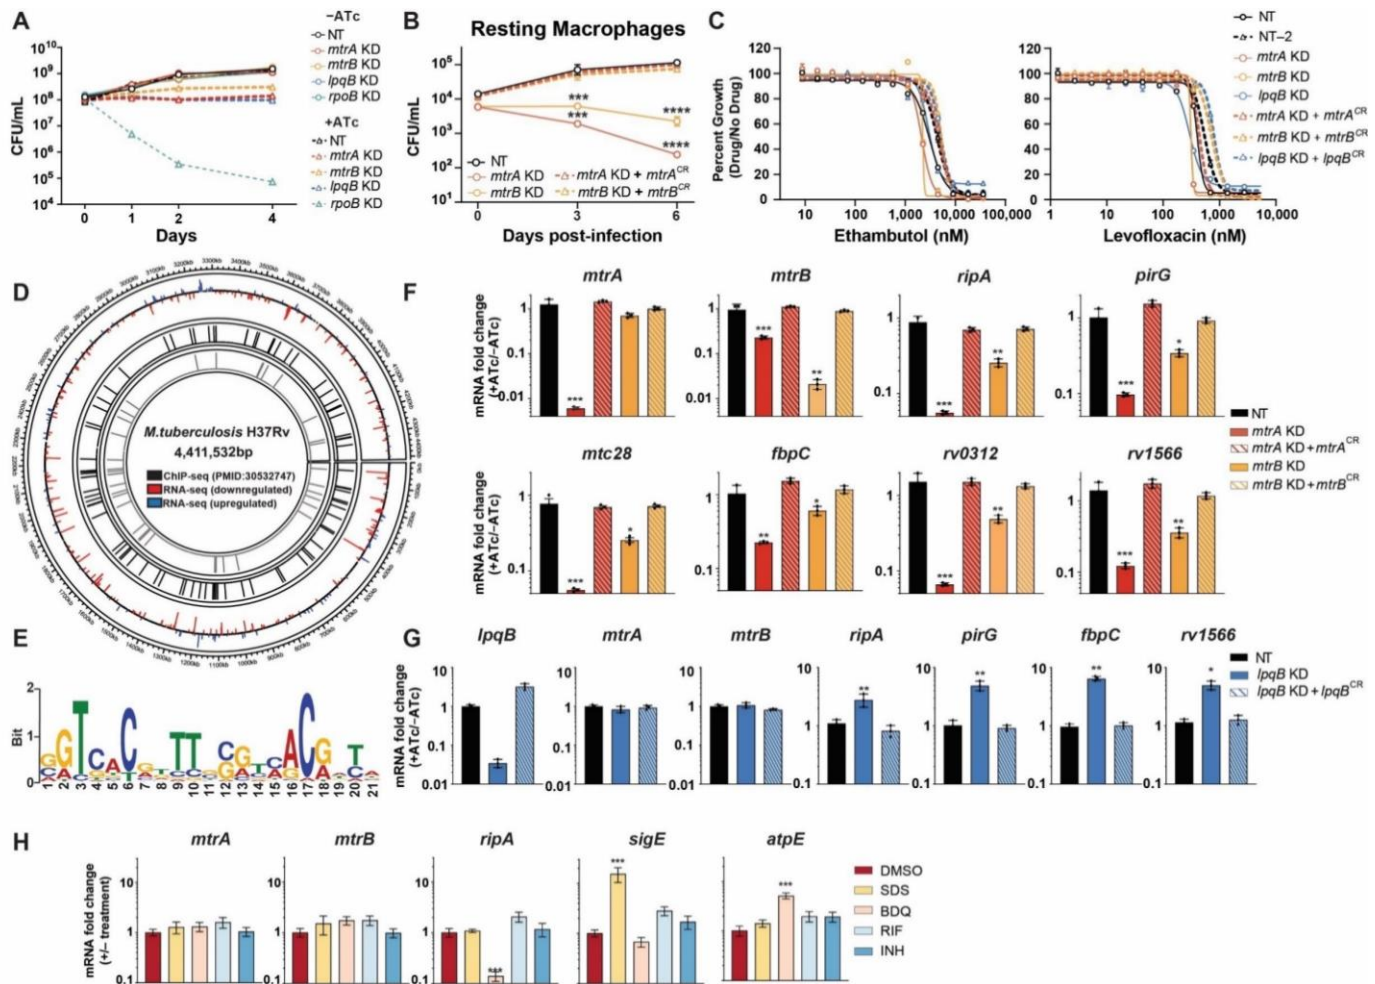

875

876

877

878

879

880

881

882

883

884

885

886

887

888

889

890

891

892

893

894

895

896

897

898

899

### Supplemental Figure 5: The MtrAB two-component system is critical for multi-drug intrinsic resistance in Mtb

- (A) Time-kill curves for the indicated CRISPRi strains. Data represent mean  $\pm$  SEM for technical triplicates. Data are representative of at least two independent experiments. NT = non-targeting; KD = knockdown; CR = CRISPRi-resistant.
- (B) Growth of the indicated CRISPRi strains in resting murine bone marrow derived macrophages. Bacterial strains were exposed to ATc (100 ng/mL) for 24 hours prior to macrophage infection. 3 and 6 days after infection, bacteria were harvested and quantified by CFU. Data represent mean  $\pm$  SEM for technical triplicates. Significance was determined by two-way ANOVA and adjusted for multiple comparisons. \*\*\*,  $p < 0.001$ ; \*\*\*\*,  $p < 0.0001$ .
- (C) MIC values for the indicated drugs were measured against the indicated strains. Data represent mean  $\pm$  SEM for technical triplicates. Data are representative of at least two independent experiments.
- (D) Circos plot depicting overlapping genes identified by RNA-seq (**Figure 2F**) and MtrA ChIP-seq (Gorla et al., 2018). Outer track: the H37Rv genome by nucleotide position; middle track: lines mark genes with a significant L2FC values ( $\text{padj} < 0.05$ ) upon *mtrA* knockdown (blue = positive L2FC; red = negative L2FC); inner tracks: black lines mark genes defined as interacting with MtrA by ChIP-seq (Gorla et al., 2018), and grey lines highlight genes which display both a significant L2FC ( $\text{padj} < 0.05$ ;  $|\text{L2FC}| > 1$ ) by *mtrA* RNAseq and are found to interact with MtrA by ChIP-seq.
- (E) Identification of an MtrA consensus binding motif. MEME analysis (Bailey et al., 2009) was performed on the promoter regions of candidate genes found to both be downregulated upon *mtrA* silencing (**Figure 2F**) and bound by MtrA by ChIP-seq (Gorla et al., 2018) ( $n=25$  genes).
- (F,G) Quantification of indicated gene mRNA levels by qRT-PCR. Strains were grown in the presence of ATc for  $\sim 3$  generations prior to harvesting RNA. Error bars are SEM of three technical replicates.

900 Statistical significance was calculated as p-value with unpaired T-test. \*, p<0.05; \*\*, p<0.01; \*\*\*,  
901 p<0.001.  
902 (H) Quantification of indicated gene mRNA levels by qRT-PCR. Wild-type H37Rv was grown in the  
903 presence of the indicated stress (RIF/BDQ/INH: 4 x IC<sub>50</sub>, SDS: 0.2%, DMSO: 0.5%) for 3 hours prior to  
904 harvesting RNA. Error bars are SEM of three technical replicates. Statistical significance was  
905 calculated as p-value with unpaired T-test. \*\*\*, p<0.001.

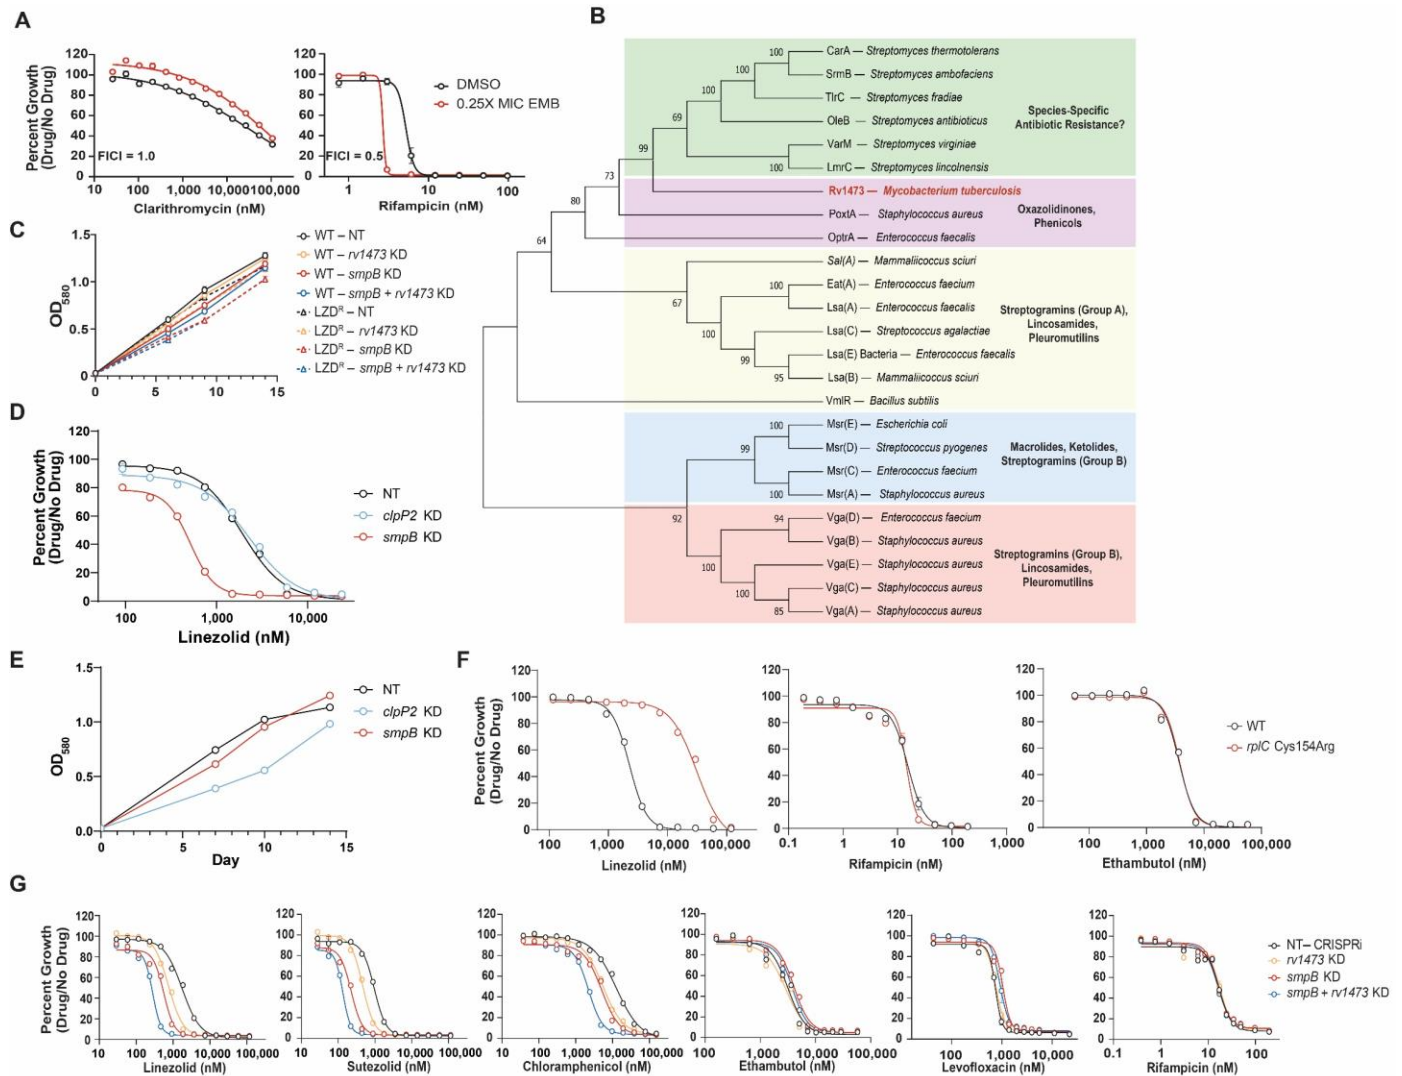

**Supplemental Figure 6: Mtb encodes diverse mechanisms of intrinsic resistance to ribosome-targeting antibiotics**

- (A) Ethambutol checkerboard assays to quantify drug-drug interactions. MIC curves are shown for each drug in the absence (DMSO) or presence of 0.25X MIC<sub>80</sub> of EMB. Fractional inhibitory concentration index (FICI) values listed represent the lowest value obtained from each checkerboard assay. Data represent mean ± SEM for technical triplicates.
- (B) Phylogenetic tree of antibiotic resistance (ARE) ABC-F proteins from the indicated species. Figure adapted from (Sharkey et al., 2016). Bootstrap values (500 replicates) are indicated at each node.
- (C) Growth curves for the LZD-associated hit genes and control strains shown in **Figure 3D**. Curves are derived from the vehicle control samples of the MIC assay. Data represent mean ± SEM for technical triplicates. Results are representative data from at least two independent experiments. NT = non-targeting; KD = knockdown.
- (D) MIC values for LZD were measured for CRISPRi knockdown strains targeting *smgB* and *clpP2* in wild-type H37Rv. Data represent mean ± SEM for technical triplicates.
- (E) Growth curves for the strains shown in (D). Curves are derived from the vehicle control samples of the MIC assay. Data represent mean ± SEM for technical triplicates.
- (F) MIC curves of WT H37Rv and an isogenic *rpIC*-Cys154Arg mutant for LZD, RIF, and EMB. Data represent mean ± SEM for six technical replicates.
- (G) MIC values for the indicated drugs were measured for the indicated CRISPRi strains. Data represent mean ± SEM for technical triplicates.

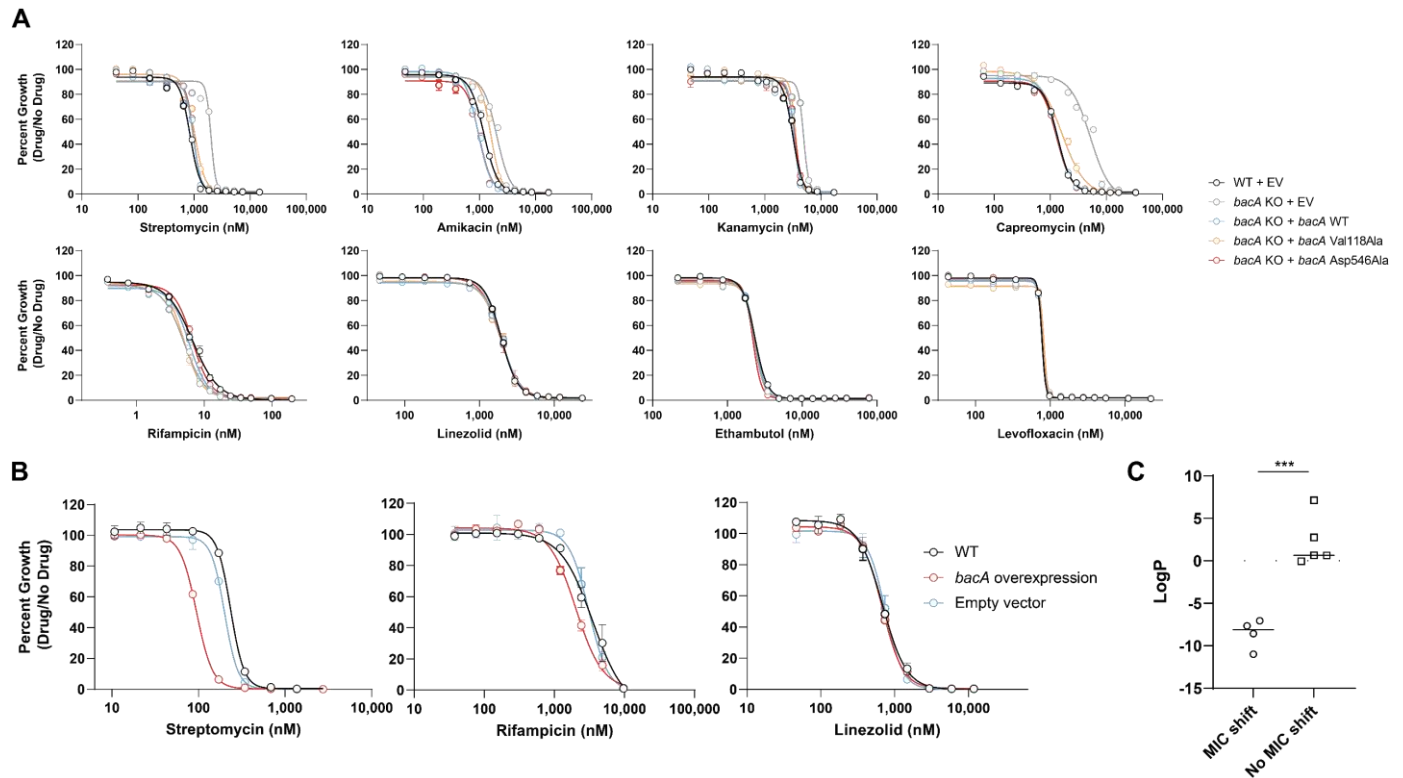

928

929

930

931

932

933

934

935

936

937

938

939

940

941

942

943

### Supplemental Figure 7: Loss-of-function mutations in *bacA* confer resistance to aminoglycosides and capreomycin

- (A) MIC values for the indicated drugs were measured for the indicated strains. Data represent mean  $\pm$  SEM for technical triplicates. Results are representative data from at least two independent experiments.
- (B) Overexpression of Mtb *bacA* confers streptomycin sensitivity in *M. smegmatis*. MIC values for the indicated drugs were measured for the three indicated strains. Data represent mean  $\pm$  SEM for technical triplicates.
- (C) LogP values for the antibiotics to which *bacA* mutants show an increased MIC (STR, AMK, CAP, KAN) or no MIC change (RIF, EMB, LVX, LZD). Results from an unpaired t-test are shown: \*\*\*,  $p < 0.001$ .

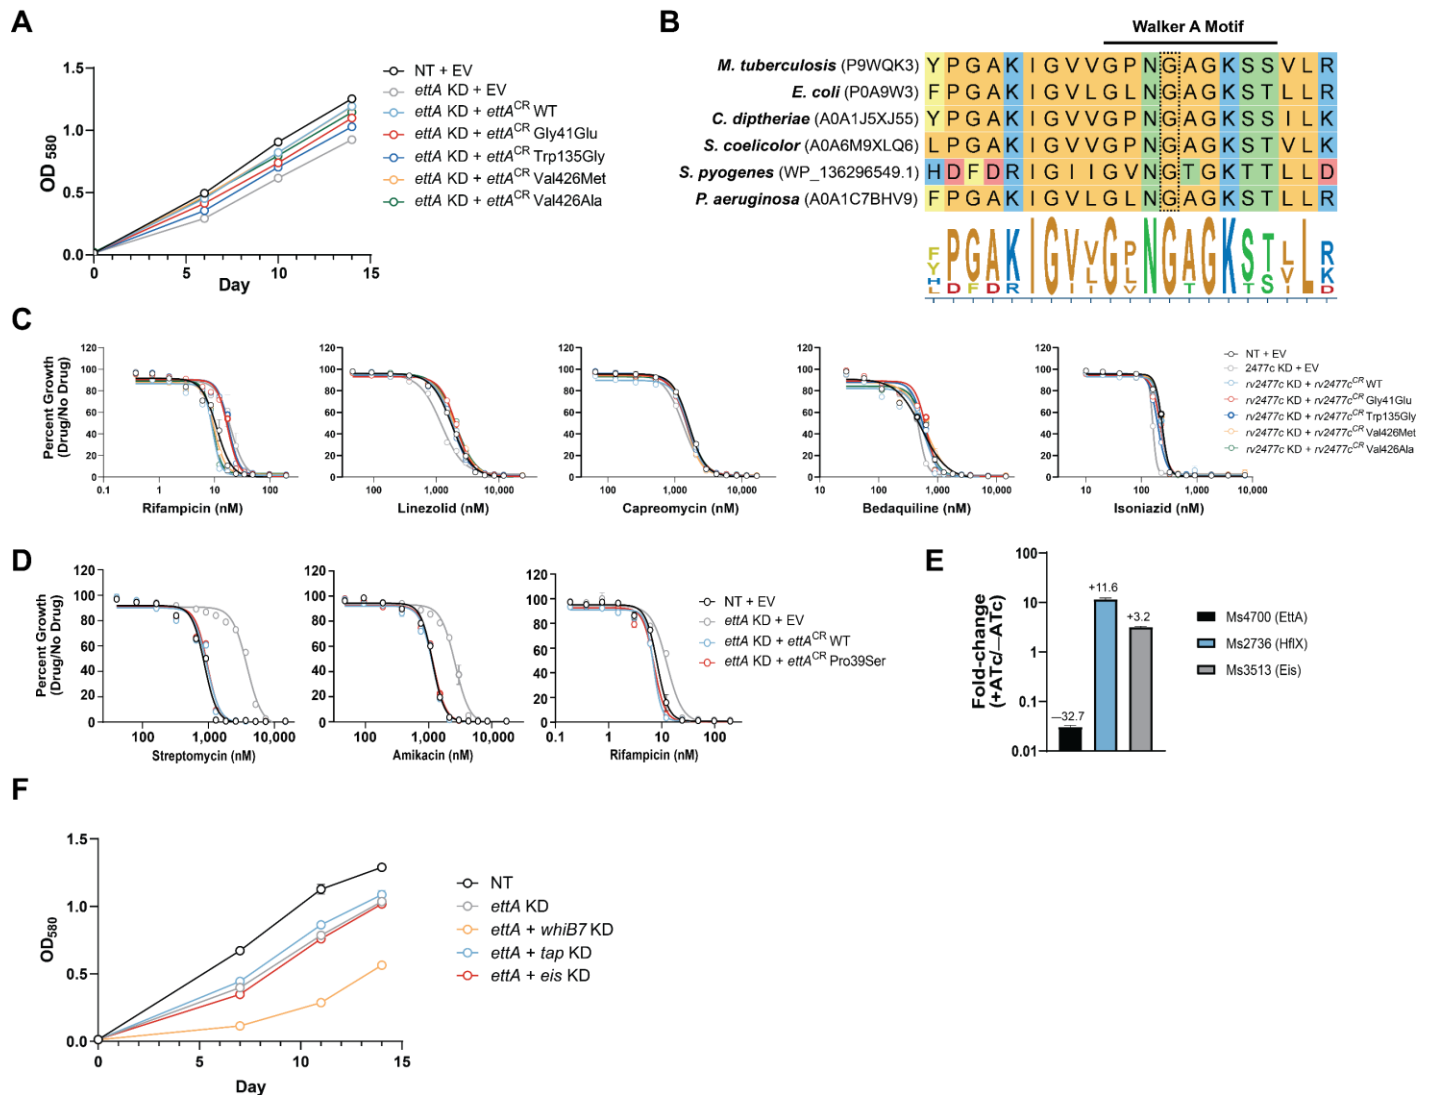

944

945

946

### Supplemental Figure 8: Partial loss-of-function mutations in *ettA* confer low-level multidrug resistance and are associated with an MDR outbreak in South America

947

948

949

950

951

952

953

954

955

956

957

958

959

960

961

962

963

964

(A) Growth curves for the strains shown in **Figure 5C**. Curves are derived from the vehicle control samples of the MIC assay. Data represent mean  $\pm$  SEM for technical triplicates. Results are representative data from at least two independent experiments.

(B) Amino acid alignment for EttA orthologs from the indicated species for the region surrounding the N-terminal Walker A motif. The Mtb EttA Gly41 residue is boxed. Accession numbers are listed next to each species.

(C) MIC values for the indicated drugs were measured for the strains shown in **Figure 5C**. Data represent mean  $\pm$  SEM for technical triplicates. Results are representative data from at least two independent experiments.

(D) The Pro39Ser mutation in *ettA* does not confer antibiotic resistance. MIC values for the indicated drugs were measured as in **Figure 5C**. Data represent mean  $\pm$  SEM for technical triplicates.

(E) Quantitative mass spectrometry results from experiments described in (Bosch et al., 2021). Values indicate protein level fold-change following CRISPRi knockdown of *ms4700*. Data represent mean  $\pm$  SEM four technical replicates derived from two biological replicates. Ms4700 could only be detected in two replicates and, thus, the mean  $\pm$  SEM for duplicates is shown.

Growth curves for the strains shown in **Figure 5E**. Curves are derived from the vehicle control samples of the MIC assay. Data represent the mean  $\pm$  SEM for technical triplicates.



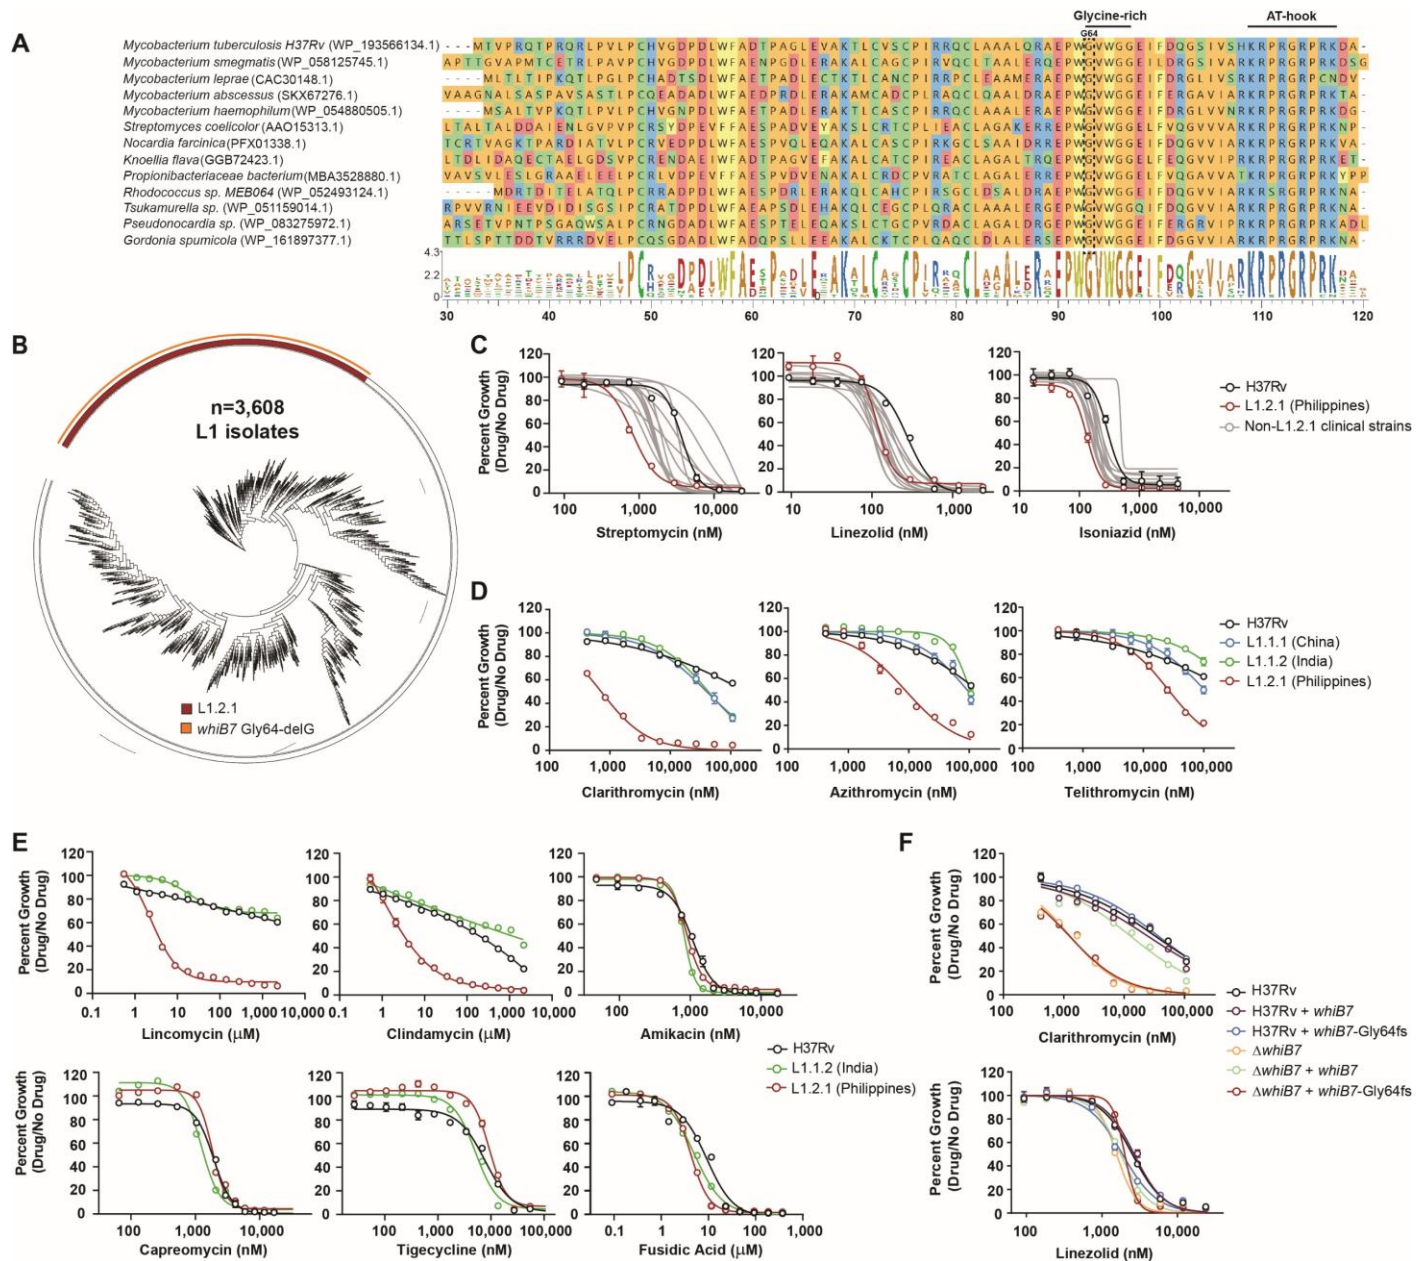

**Supplemental Figure 9: The L1.2.1 sub-lineage has a loss-of-function mutation in *whiB7* that renders it hypersusceptible to macrolides, ketolides, and lincosamides**

(A) Alignment of WhiB7 orthologues from representative actinobacteria. Accession numbers are listed next to each species. The conserved glycine-rich motif and DNA binding AT-hook element are highlighted.

(B) Phylogenetic tree of all L1 Mtbc clinical isolates (n=3,608) in our WGS database (**Supplemental Data 4**). L1.2.1 and the *whiB7* Gly64delG mutation are highlighted.

(C-E) MIC values the indicated drugs were measured for a reference set of Mtbc clinical strains. Error bars represent the standard error of the mean (SEM) for technical triplicates. Results are representative data from at least two independent experiments.

(F) H37Rv was transformed with an integrating plasmid to express either the H37Rv *whiB7* allele or the L1.2.1 *whiB7* Gly64-delG allele *in trans* from its native promoter. The resulting strains were then used to measure MIC values for the indicated drugs. Error bars represent the SEM for technical triplicates. Results are representative data from at least two independent experiments.

965  
966  
967  
968  
969  
970  
971  
972  
973  
974  
975  
976  
977  
978  
979  
980  
981  
982

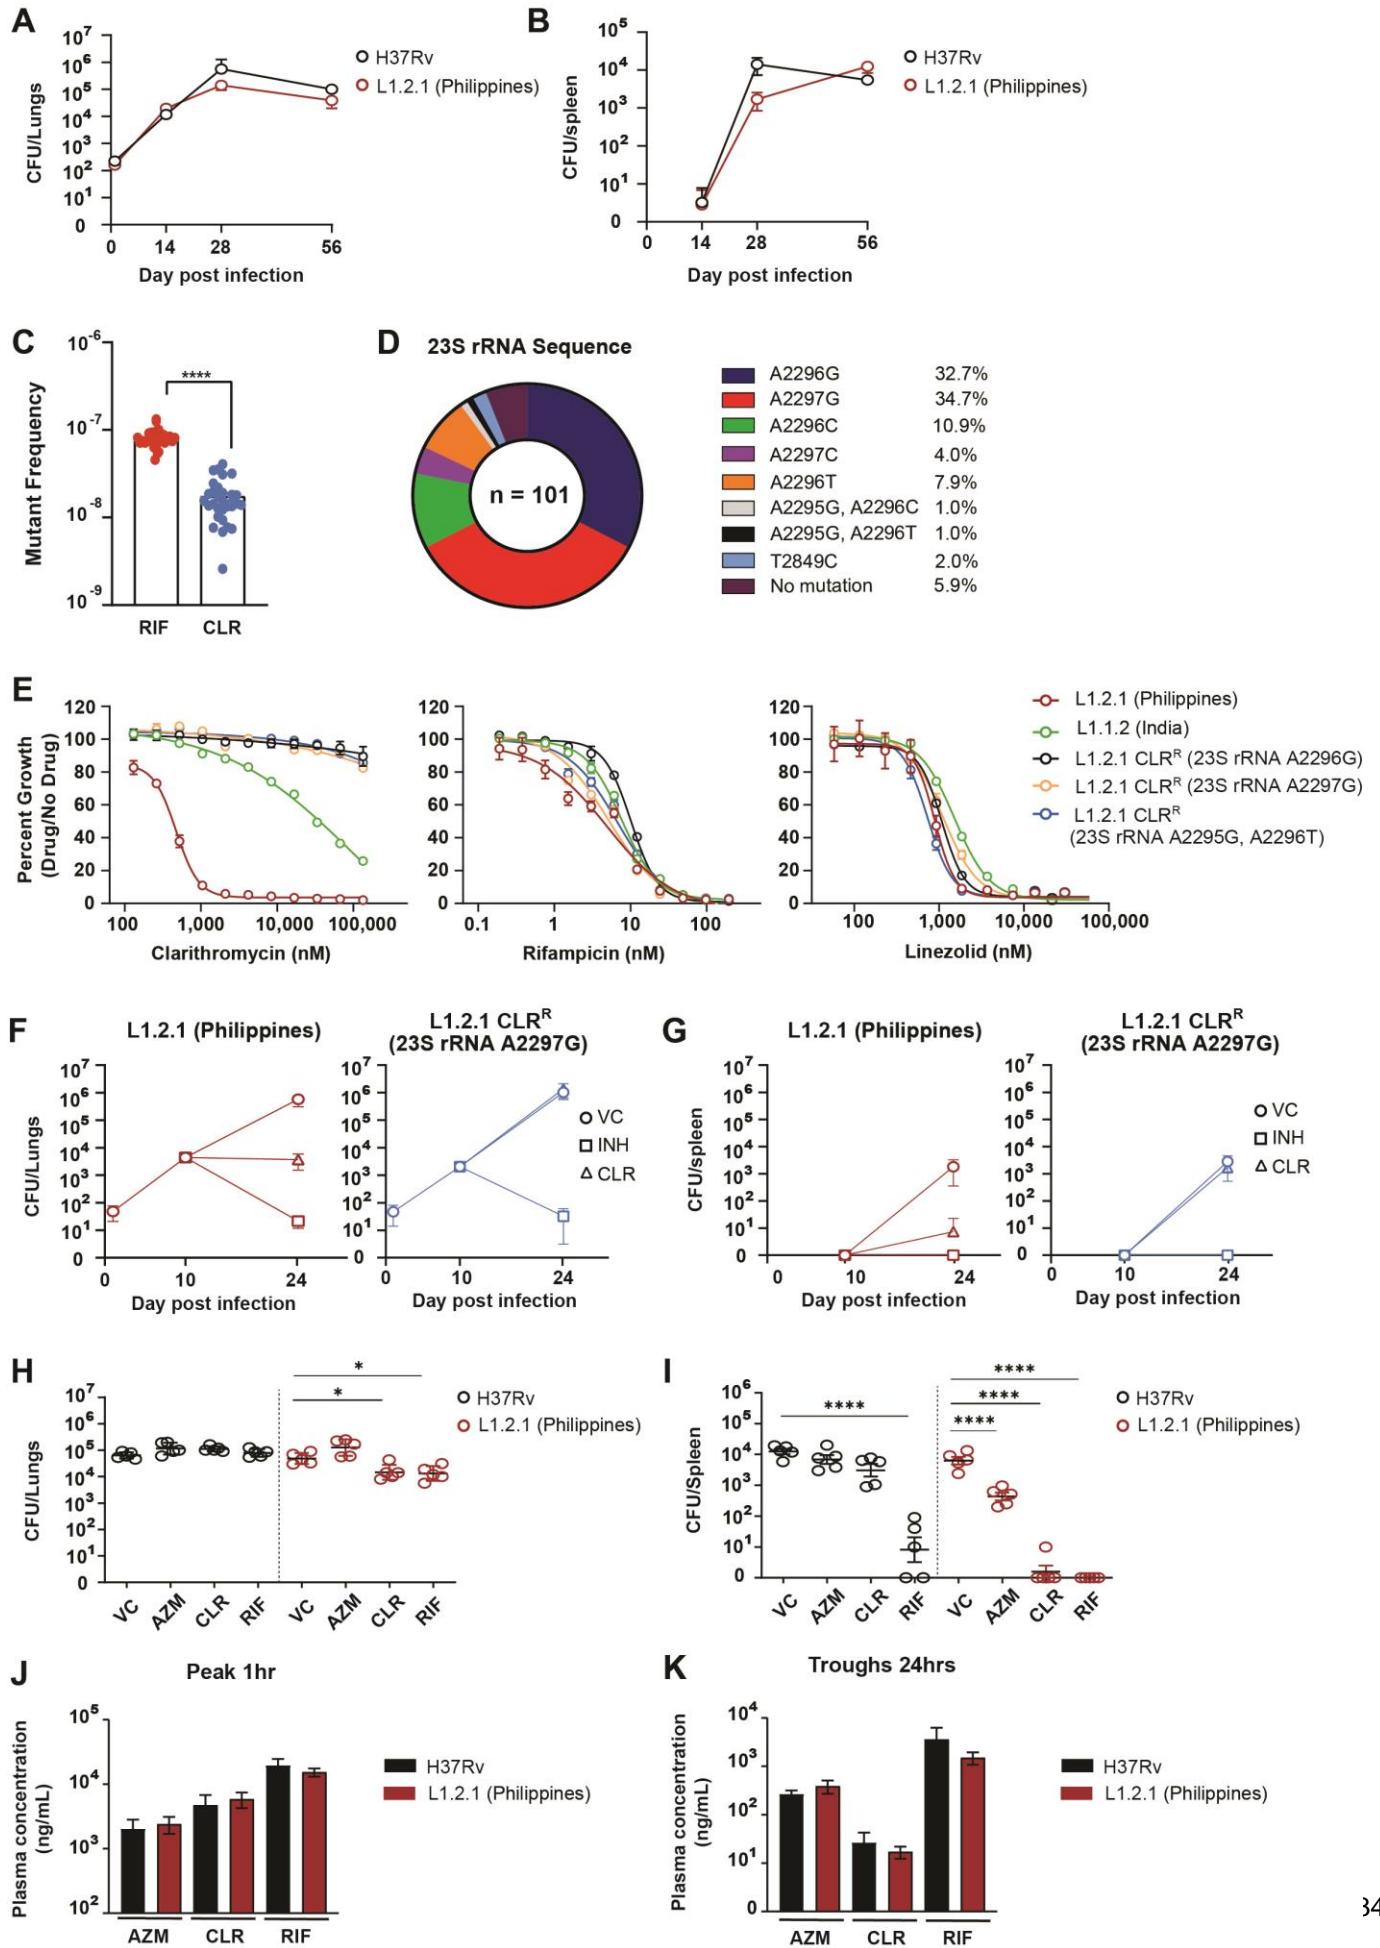

984 **Supplemental Figure 10: The L1.2.1 sublineage is susceptible to clarithromycin *in vivo***  
985 (A,B) Growth kinetics of H37Rv and L1.2.1 *in vivo*. BALB/c mice were infected with approximately 100-  
986 200 CFU by aerosol and killed over the course of infection at indicated time points. Mean lung (A) and  
987 spleen (B) Mtb CFU ( $\pm$  SEM) in BALB/c mice were determined after primary infection  
988 (C) Rifampicin and clarithromycin mutation frequency analysis with the L1.2.1 strain.  
989 (D) Distribution of 23S rRNA mutations from *in vitro*-selected, clarithromycin-resistant L1.2.1 isolates from  
990 panel (C).  
991 (E) MIC profiles of representative CLR-resistant L1.2.1 isolates. Error bars represent the standard error of  
992 the mean (SEM) for technical triplicates. Results are representative data from at least two independent  
993 experiments.  
994 (F,G) Mean lung (F) and spleen (G) Mtb CFU ( $\pm$  SEM) in BALB/c mice after isoniazid (INH; 25 mg/kg), or  
995 clarithromycin (CLR; 200 mg/kg) treatment. Mice were infected with approximately 100-200 CFU of  
996 aerosolized Mtb. After ten days to allow the acute infection to establish, chemotherapy was initiated.  
997 Mtb bacterial load of lungs and spleen were determined at the indicated time points. VC = vehicle  
998 control. CLR<sup>R</sup> = clarithromycin-resistant.  
999 (H,I) Mean lung (F) and spleen (G) Mtb colony-forming units (CFU;  $\pm$  SEM) in BALB/c mice after  
1000 azithromycin (AZM; 200 mg/kg), clarithromycin (CLR; 200 mg/kg), or rifampicin (RIF; 25 mg/kg)  
1001 treatment. Mice were infected with approximately 100-200 CFU of aerosolized Mtb. After two weeks to  
1002 allow the acute infection to establish, chemotherapy was initiated. Following two weeks of drug  
1003 therapy, Mtb bacterial load of lungs and spleen were determined. Statistical significance was  
1004 assessed by one-way ANOVA followed by Tukey's post-hoc test. \*,  $p < 0.05$ ; \*\*\*\*,  $p < 0.0001$ .  
1005 (J,K) Monitoring of plasma drug concentrations after 2 weeks of therapy, prior to CFU enumeration in  
1006 lungs and spleen. Blood was collected at 1h (J) and 24h (K) post-dose after 13 daily doses, from 4  
1007 mice in each infection and treatment group described in (H,I). Drug concentrations were measured in  
1008 plasma using high pressure liquid chromatography coupled to tandem mass spectrometry. Mean and  
1009 standard deviation (error bars) are shown.  
1010  
1011  
1012  
1013  
1014  
1015  
1016  
1017  
1018  
1019  
1020  
1021  
1022  
1023  
1024  
1025  
1026  
1027  
1028  
1029

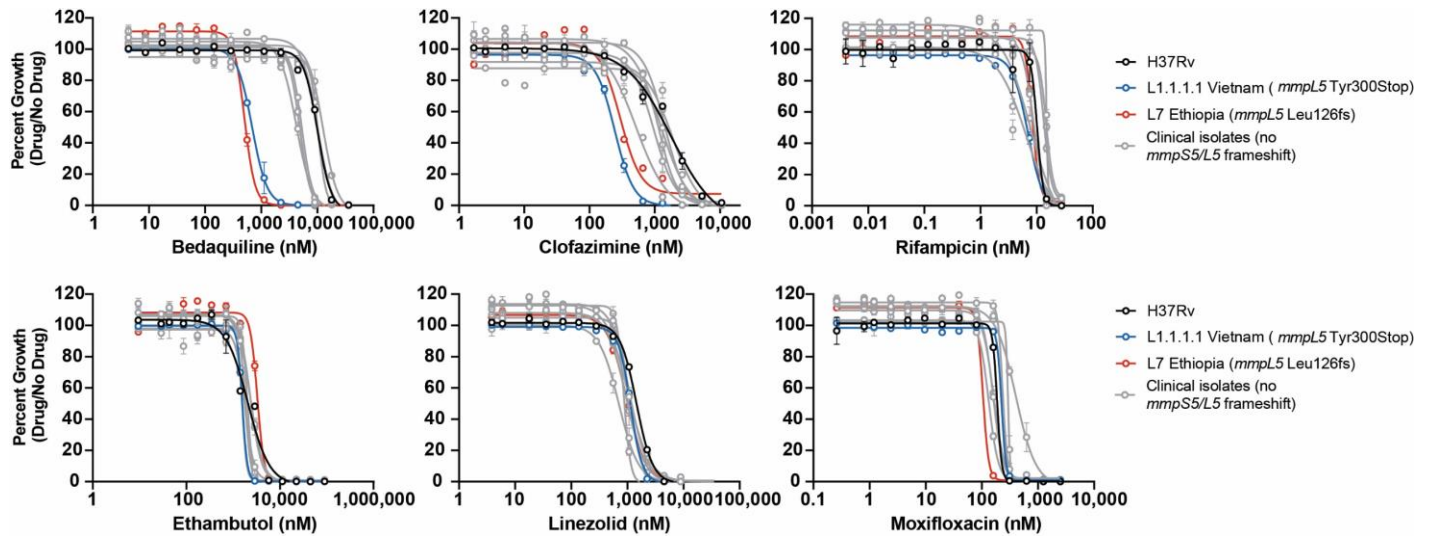

1030  
1031  
1032  
1033  
1034  
1035  
1036  
  
1037  
1038

### Supplemental Figure 11: Loss-of-function mutations on *MmpL5* renders it sensitive to Bedaquiline and Clofazimine

MIC values the indicated drugs were measured for a reference set of *Mtb* clinical strains. Error bars represent the standard error of the mean (SEM) for technical triplicates. Results are representative data from at least two independent experiments.

1039  
1040  
1041  
1042  
1043  
1044  
1045

## SUPPLEMENTAL INFORMATION

### Supplemental Table 1: List of plasmids and primers used in this work

#### Plasmids used in this work

| Fig. used                         | Plasmid Name | Plasmid genotype                                                                       | Plasmid description                                                                                                                                                                                                                       | Plasmid Map                                                                                                     | Resistance marker        |
|-----------------------------------|--------------|----------------------------------------------------------------------------------------|-------------------------------------------------------------------------------------------------------------------------------------------------------------------------------------------------------------------------------------------|-----------------------------------------------------------------------------------------------------------------|--------------------------|
| 2,3,4,5,S4, S5, S6, S7,S8, S9,S10 | pIRL58       | Ptet(gB73)-Sth1 dCas9 Ptet(gB52)-Sth1 sgRNA P(gB37)-TetRCO(tetON) L5 attP only v1::Kan | Sth1 dCas9 CRISPRi plasmid optimized for use in <i>M. tuberculosis</i> . Sth1 dCas9 and the sgRNA are induced in the presence of ATc. This plasmid lacks the full L5 integrase and must be co-transformed pIRL19                          | <a href="https://benchling.com/s/seq-Gv9EfPn1vM7OMu6HPyU3">https://benchling.com/s/seq-Gv9EfPn1vM7OMu6HPyU3</a> | Kanamycin                |
| 2,3,4,5,S4, S5, S6, S7,S8, S9,S10 | pIRL19       | Pmop-L5 Int AmpR (suicide plasmid)                                                     | The L5 phage Int protein is expressed from the mycobacterial optimized promoter (MOP). This backbone is non-replicating and non-integrating in mycobacteria.                                                                              | <a href="https://benchling.com/s/seq-BAF0JelwBQN6D2dw5alf">https://benchling.com/s/seq-BAF0JelwBQN6D2dw5alf</a> | Ampicillin               |
| 2, S5, S9                         | pIRL60       | pDE43-MCZtq26 Tweety attP::Zeo (empty vector)                                          | Tweety::Zeo integration backbone. Constrains the Tweety Int with a zeocin resistance cassette.                                                                                                                                            | <a href="https://benchling.com/s/seq-s6M31jHfAUSXmCI90JQc">https://benchling.com/s/seq-s6M31jHfAUSXmCI90JQc</a> | Chloramphenicol / Zeocin |
| 2, S5                             | pIRL140      | pIRL60-PmtrA-mtrA Tweety attP::Zeo                                                     | CRISPRi resistant allele of the mtrA ORF under the expression of the endogenous mtrA promoter (300 bp upstream of the mtrA translational start site). Cloned by Gibson assembly into EcoRV and XbaI-digested pIRL60.                      | <a href="https://benchling.com/s/seq-T2YS6JwBvXhdDigP54Wp">https://benchling.com/s/seq-T2YS6JwBvXhdDigP54Wp</a> | Chloramphenicol / Zeocin |
| 2, S5                             | pIRL141      | pIRL60-PmtrA-mtrB Tweety attP::Zeo                                                     | CRISPRi resistant allele of the mtrB ORF under the expression of the endogenous mtrA promoter (300 bp upstream of the mtrA translational start site). Cloned by Gibson assembly into EcoRV and XbaI-digested pIRL60.                      | <a href="https://benchling.com/s/seq-BaNN2970G1ukBaFnqZ3b">https://benchling.com/s/seq-BaNN2970G1ukBaFnqZ3b</a> | Chloramphenicol / Zeocin |
| 2, S5                             | pIRL142      | pIRL60-Phsp60-lpqB Tweety attP::Zeo                                                    | CRISPRi resistant allele of the lpqB ORF under the expression of the hsp60 promoter. Cloned by Gibson assembly into EcoRV and XbaI-digested pIRL60.                                                                                       | <a href="https://benchling.com/s/seq-n98842nj4uVFdah5COhw">https://benchling.com/s/seq-n98842nj4uVFdah5COhw</a> | Chloramphenicol / Zeocin |
| 4, 5, S7, S8                      | pIRL133      | pIRL133 Giles attP::Zeo (empty vector)                                                 | Vector used for bacA and ettA experiments. Integrating vector containing the Giles attP site and expressing a zeocin resistance cassette. Must be co-transformed with pIRL40. Contains barcode random barcode sequence AAATAAAAACCACTCTCC | <a href="https://benchling.com/s/seq-m7KsnT49G6AKHZOruvjn">https://benchling.com/s/seq-m7KsnT49G6AKHZOruvjn</a> | Zeocin                   |
| 4, 5, S7, S8                      | pIRL40       | Puv15-Giles Int (suicide plasmid)                                                      | The Giles phage Int protein is expressed from the Puv15 promoter. This backbone is non-replicating and non-integrating in mycobacteria.                                                                                                   | <a href="https://benchling.com/s/seq-2PVXvHq0CfNPVawcz1Ku">https://benchling.com/s/seq-2PVXvHq0CfNPVawcz1Ku</a> | Ampicillin               |
| 4, S7                             | pINP411      | pIRL133-Phsp60-bacA WT Giles attP::Zeo                                                 | pIRL133 backbone expressing the WT bacA allele under the hsp60 promoter. Contains random barcode sequence TCGGGAATTCTCACGCGT                                                                                                              | <a href="https://benchling.com/s/seq-xm930WSRuZg57YePOv6V">https://benchling.com/s/seq-xm930WSRuZg57YePOv6V</a> | Zeocin                   |
| 4                                 | pINP412      | pIRL133-Phsp60-bacA Trp153Ser Giles attP::Zeo                                          | pIRL133 backbone expressing the Trp153Ser bacA allele under the hsp60 promoter. Contains random barcode sequence ATCAGTGTTCATACAAG                                                                                                        | <a href="https://benchling.com/s/seq-xS0HjAjl3meB6dNLvRZ">https://benchling.com/s/seq-xS0HjAjl3meB6dNLvRZ</a>   | Zeocin                   |
| 4                                 | pINP413      | pIRL133-Phsp60-bacA Tyr288Stop Giles attP::Zeo                                         | pIRL133 backbone expressing the Tyr288Stop bacA allele under the hsp60 promoter. Contains random barcode sequence GCCGTTTGGGACTCGTCT                                                                                                      | <a href="https://benchling.com/s/seq-wc5ZxwPFHxRtKA64bRKt">https://benchling.com/s/seq-wc5ZxwPFHxRtKA64bRKt</a> | Zeocin                   |
| S7                                | pINP415      | pIRL133-Phsp60-bacA Asp546Ala Giles attP::Zeo                                          | pIRL133 backbone expressing the Asp546Ala bacA allele under the hsp60 promoter. Contains random barcode sequence ATACTCAAGTTTATATAT                                                                                                       | <a href="https://benchling.com/s/seq-vLyBVRz5sgy98D3Kevt6">https://benchling.com/s/seq-vLyBVRz5sgy98D3Kevt6</a> | Zeocin                   |
| 4                                 | pINP416      | pIRL133-Phsp60-bacA Leu551fs Giles attP::Zeo                                           | pIRL133 backbone expressing the Leu551fs bacA allele under the hsp60 promoter. Contains random barcode sequence GGGAGTCTGTCTTACCA                                                                                                         | <a href="https://benchling.com/s/seq-7qlml27CxTswBCARmKaw">https://benchling.com/s/seq-7qlml27CxTswBCARmKaw</a> | Zeocin                   |

|       |         |                                                    |                                                                                                                                                                                                                                     |                                                                                                                 |                          |
|-------|---------|----------------------------------------------------|-------------------------------------------------------------------------------------------------------------------------------------------------------------------------------------------------------------------------------------|-----------------------------------------------------------------------------------------------------------------|--------------------------|
| 4     | pINP417 | pIRL133-Phsp60-bacA Gly554fs Giles attP::Zeo       | pIRL133 backbone expressing the Gly554fs bacA allele under the hsp60 promoter. Contains random barcode sequence TTGGTACCCCGTTATAGT                                                                                                  | <a href="https://benchling.com/s/seq-PjFZhXAUmUCuo0V1kSwi">https://benchling.com/s/seq-PjFZhXAUmUCuo0V1kSwi</a> | Zeocin                   |
| S7    | pINP422 | pIRL133-Phsp60-bacA Val118Ala Giles attP::Zeo      | pIRL133 backbone expressing the Val118Ala bacA allele under the hsp60 promoter. Contains random barcode sequence TTGCTCATATTCGCGGTA                                                                                                 | <a href="https://benchling.com/s/seq-2gsmPyD9adel4O452V1c">https://benchling.com/s/seq-2gsmPyD9adel4O452V1c</a> | Zeocin                   |
| S7    | pINP370 | Ptet(gB52)-bacA L5 attP: Kan                       | L5 integrating plasmid constitutively expressing the Mtb bacA allele under the synthetic Ptet(gB52) promoter in the absence of a Tet repressor                                                                                      | <a href="https://benchling.com/s/seq-WDve9cLzU2bhPwCEhNCM">https://benchling.com/s/seq-WDve9cLzU2bhPwCEhNCM</a> | Kanamycin                |
| S7    | pINP371 | Ptet(gB52)-Empty L5 attP: Kan                      | L5 integrating plasmid with the synthetic Ptet(gB52) promoter and no downstream gene. As with pINP370 this plasmid lacks a Tet repressor                                                                                            | <a href="https://benchling.com/s/seq-84uPVQxdtoa9RgPuli6N">https://benchling.com/s/seq-84uPVQxdtoa9RgPuli6N</a> | Kanamycin                |
| 5, S8 | pIRL134 | pIRL133-PettA-ettA WT Giles attP::Zeo              | pIRL133 backbone expressing a CRISPRi resistant WT allele of ettA under its endogenous promoter. Contains random barcode sequence TCGGGAATTCTCACGCGT                                                                                | <a href="https://benchling.com/s/seq-kKKvtvIIAOgThvBiZoD7">https://benchling.com/s/seq-kKKvtvIIAOgThvBiZoD7</a> | Zeocin                   |
| S8    | pIRL135 | pIRL133-PettA-ettA Pro39Ser Giles attP::Zeo        | pIRL133 backbone expressing a CRISPRi resistant Pro39Ser allele of ettA under its endogenous promoter. Contains random barcode sequence ATCAGTGTTCATACAAG                                                                           | <a href="https://benchling.com/s/seq-m7KsnT49GbAKHXOruvjn">https://benchling.com/s/seq-m7KsnT49GbAKHXOruvjn</a> | Zeocin                   |
| 5, S8 | pIRL136 | pIRL133-PettA-ettA Gly41Glu Giles attP::Zeo        | pIRL133 backbone expressing a CRISPRi resistant Gly41Glu allele of ettA under its endogenous promoter. Contains random barcode sequence GCCGTTTGGGACTCGTCT                                                                          | <a href="https://benchling.com/s/seq-2YfWjMdXzrg5u8DJRT3U">https://benchling.com/s/seq-2YfWjMdXzrg5u8DJRT3U</a> | Zeocin                   |
| 5, S8 | pIRL137 | pIRL133-PettA-ettA Trp135Gly Giles attP::Zeo       | pIRL133 backbone expressing a CRISPRi resistant Trp135Gly allele of ettA under its endogenous promoter. Contains random barcode sequence ATACTCAAGTTTATATAT                                                                         | <a href="https://benchling.com/s/seq-HMeozzDPogc92G7zvBbR">https://benchling.com/s/seq-HMeozzDPogc92G7zvBbR</a> | Zeocin                   |
| 5, S8 | pIRL138 | pIRL133-PettA-ettA Val426Ala Giles attP::Zeo       | pIRL133 backbone expressing a CRISPRi resistant Val426Ala allele of ettA under its endogenous promoter. Contains random barcode sequence TTGGTACCCCGTTATAGT                                                                         | <a href="https://benchling.com/s/seq-poxjOoLz4VkrB2pyW8Nc">https://benchling.com/s/seq-poxjOoLz4VkrB2pyW8Nc</a> | Zeocin                   |
| 5, S8 | pIRL139 | pIRL133-PettA-ettA Val426Met Giles attP::Zeo       | pIRL133 backbone expressing a CRISPRi resistant Val426Met allele of ettA under its endogenous promoter. Contains random barcode sequence GTCGGCTAGCAATATTCT                                                                         | <a href="https://benchling.com/s/seq-Cet0qyRkZVDzWjqk4Fu5">https://benchling.com/s/seq-Cet0qyRkZVDzWjqk4Fu5</a> | Zeocin                   |
| S9    | pIRL145 | pBR322-whiB7::Amp                                  | Backbone: pBR322. Cloned whiB7+5'UTR region, as PCR template for generating whiB7 KO mutant in Mtb. Cloned by Gibson assembly into ClaI and HindIII-digested pIRL39.                                                                | <a href="https://benchling.com/s/seq-8HUz8kLA4QtU3gEkTirl">https://benchling.com/s/seq-8HUz8kLA4QtU3gEkTirl</a> | Ampicillin               |
| S9    | pIRL146 | pIRL60-PwhiB7-whiB7-Gly64delG(fs) Tweety attP::Zeo | whiB7-Gly64delG mutant ORF under the expression of the endogenous whiB7 promoter (500 bp upstream of the whiB7 translational start site including the 5'UTR region). Cloned by Gibson assembly into EcoRV and XbaI-digested pIRL60. | <a href="https://benchling.com/s/seq-EYD2RXXj3Zk3Rojw5ruG">https://benchling.com/s/seq-EYD2RXXj3Zk3Rojw5ruG</a> | Chloramphenicol / Zeocin |

1046  
1047  
1048

### sgRNAs used in this work

| Fig. used                   | sgRNA ID                  | Gene targeted  | Gene name    | sgRNA targeting sequence (5'-3') | PAM (5'-3') |
|-----------------------------|---------------------------|----------------|--------------|----------------------------------|-------------|
| 2,3,4,5,6 S4, S5,S6, S7, S8 | Non-Targeting control     | NA             | NA           | GCATCCGAGCCCGTCCGTTAA            | NA          |
| S4                          | <i>ccdA</i> sgRNA PAM 15  | <i>rv0527</i>  | <i>ccdA</i>  | ATCAGCAGCCTCCGACCCGCT            | GCAGCA<br>G |
| S4                          | <i>kasA</i> sgRNA PAM 22  | <i>rv2245</i>  | <i>kasA</i>  | ATGTCGTGCTTACAGTAACGCCCG         | AAGGCA<br>A |
| S4                          | <i>mmpL3</i> sgRNA PAM 15 | <i>rv0206c</i> | <i>mmpL3</i> | AACATCCGACCACGGTCGCGT            | CCAGCA<br>G |
| S4                          | <i>embB</i> sgRNA PAM 8   | <i>rv3795</i>  | <i>embB</i>  | GACAGCGAACCGTCGACGGTGG           | GCAGGA<br>T |

|       |                                   |                |               |                              |             |
|-------|-----------------------------------|----------------|---------------|------------------------------|-------------|
| S4    | <i>ripA</i> sgRNA PAM 10          | <i>rv1477</i>  | <i>ripA</i>   | GCTGCAGGTTGGCCATCACCGCT      | TGGGAA<br>C |
| 2, S5 | <i>mtrA</i> sgRNA PAM 4           | <i>rv3246c</i> | <i>mtrA</i>   | GGTGAGCATCACGATCGGAACA       | CCGGAA<br>T |
| 2, S5 | <i>mtrB</i> sgRNA PAM 2           | <i>rv3245c</i> | <i>mtrB</i>   | GTCCCGATGATCAGGGCCGGCC<br>C  | GGAGAA<br>A |
| 2, S5 | <i>lpqB</i> sgRNA PAM 1           | <i>rv3244c</i> | <i>lpqB</i>   | ACCCCCACATCCGAGAGCGAGC       | CGAGAA<br>T |
| 3, S6 | <i>smpB</i> sgRNA PAM 15          | <i>rv3100c</i> | <i>smpB</i>   | GTGTGATCTGGCGGCGATGCA        | ACAGCA<br>G |
| 3, S6 | <i>rv1473</i> sgRNA PAM 1         | <i>rv1473</i>  | <i>rv1473</i> | GCATAGGGTTCGACCTCCCCCG       | CCAGAA<br>T |
| S6    | <i>clpP2</i> sgRNA PAM 16         | <i>rv2460c</i> | <i>clpP2</i>  | GATGTACATGGTGATATCGCGG       | TCGGGA<br>T |
| 5, S8 | <i>ettA</i> sgRNA PAM 2           | <i>rv2477c</i> | <i>ettA</i>   | ACGACACCGATCTTGGCGCCCG<br>G  | ATAGAA<br>A |
| 5     | <i>whiB7</i> promoter sgRNA PAM 6 | <i>rv3197A</i> | <i>whiB7</i>  | GCCTGTACCGCAAACGCGCAG<br>G   | TCAGAA<br>A |
| 5     | <i>tap</i> sgRNA PAM 5            | <i>rv1258c</i> | <i>tap</i>    | GCCCTCGCGCTGCAACACCAGC<br>C  | ACGGAA<br>A |
| 5     | <i>eis</i> sgRNA PAM 1            | <i>rv2416c</i> | <i>eis</i>    | GTCGGGCTACACAGGGTCACAGT<br>C | ACAGAA<br>T |

1049  
1050  
1051  
1052

### qPCR primers used in this work

| Fig. used | Target gene    | Gene name     | Forward primer (5'-3') | Reverse primer (5'-3') |
|-----------|----------------|---------------|------------------------|------------------------|
| 2, 5, S5  | <i>rv2703</i>  | <i>sigA</i>   | GTGATTCGTCTGGGATGAAGA  | TACCTTGCCGATCTGTTTGAG  |
| 2, S5     | <i>rv3246c</i> | <i>mtrA</i>   | CCATCGCCGACGTAGAAAT    | AGCAGCACATCACGAGTAAA   |
| 2, S5     | <i>rv3245c</i> | <i>mtrB</i>   | ACCACGCCGAACACAAA      | AAACACCAGCTTCTCCTCAC   |
| 2, S5     | <i>rv3244c</i> | <i>lpqB</i>   | GTGCTGCGAGCGATACA      | GTCACGGGACAGTTGAAGAT   |
| 2, S5     | <i>rv1477</i>  | <i>ripA</i>   | TACTCGGGTTCGAGTACAA    | TTCGGGCCGTAGAAGATGA    |
| 2, S5     | <i>rv3810</i>  | <i>pirG</i>   | AACGACGTGATGCAGGTG     | TGCATGATCGACGGCATTAG   |
| 2, S5     | <i>rv0040c</i> | <i>mtc28</i>  | CATCACACACGGCTACATTGA  | CCTCGATGATTGATGACGGAAA |
| 2, S5     | <i>rv1158</i>  | <i>rv1158</i> | CCAACGCACCGCAAATC      | TGGAAAGGTGGCGGTTATC    |
| 2, S5     | <i>rv0312</i>  | <i>rv0312</i> | CCATTGACCGGCTTCATCTA   | GACGAGTGTGGAACGAAAGA   |
| 2, S5     | <i>rv1566</i>  | <i>rv1566</i> | CTGTCCTGGTTACGGTCTG    | AACCCGACGGTGTGATG      |
| 2, S5     | <i>rv0129c</i> | <i>fbpC</i>   | GTGTTGCTGGACGGAATAA    | GGATGGCACCTGCAGATATT   |
| 5         | <i>rv3197a</i> | <i>whiB7</i>  | CAGACAAAGATTGCCGGTTT   | ACACACAGTGTCTTGGCTAC   |
| 5         | <i>rv1988</i>  | <i>erm</i>    | CCGCCGTACGGGATTC       | CGTTGCGAGAAGCGAATTTAC  |
| 5         | <i>rv2725c</i> | <i>hflx</i>   | GCTGTGCAGGTTAAGGTTATTG | GCAGCATGTACTCCATCTGAG  |
| 5         | <i>rv2416c</i> | <i>eis</i>    | TCACGAAGTTGGCGAGTTT    | CAGTACGTCCCGATCCATTC   |

1053  
1054  
1055  
1056

### Other primers used in this work

| Fig. used | Legacy Name | Sequence (5'-3')       | Notes                         | Description                                      |
|-----------|-------------|------------------------|-------------------------------|--------------------------------------------------|
| 3, S6     | oINP537     | GGTTGGGCAAGAGTTGACCGCG | rplC Amplification Fwd Primer | rplC Amplification Fwd Primer, LZD-resistant Mtb |

|       |          |                                               |                                |                                                                 |
|-------|----------|-----------------------------------------------|--------------------------------|-----------------------------------------------------------------|
| 3, S6 | oINP538  | TCTGCTCTTGCGCAGCCATCAC                        | rpIC Amplification Rev Primer  | rpIC Amplification Rev Primer, LZD-resistant Mtb                |
| S10   | oINP531  | GCATACCAAGCGTACGAGATAAC                       | Rrl Amplification Fwd Primer   | Rrl Amplification Fwd Primer, CLR-resistant Mtb                 |
| S10   | oINP532  | CTGATCTTGGAGAAGGTTTCCCG                       | Rrl Amplification Rev Primer   | Rrl Amplification Rev Primer, CLR-resistant Mtb                 |
| 6, S9 | oLSQ56 4 | GAGGCCCTTTCGTCTTCAAGCGCCGATCCG GTGCCGGG       | whiB7-mtb-500_fwd              | whiB7-KO Mtb mutant construction                                |
| 6, S9 | oLSQ56 5 | TGGATCCACTGCCGACCAAATGCGTTGT TGCAATCAC        | whiB7-mtb-500_rev              | whiB7-KO Mtb mutant construction                                |
| 6, S9 | oLSQ56 6 | TGGTGTGGCAGTGGATCCATAACTTCGTAT AATGTATG       | whiB7-mtb-hyg_fwd              | whiB7-KO Mtb mutant construction                                |
| 6, S9 | oLSQ56 7 | GACGTCCGCGGGCGCCATAACTTCGTAT AG               | whiB7-mtb-hyg_rev              | whiB7-KO Mtb mutant construction                                |
| 6, S9 | oLSQ56 8 | ATGGCGCGCCCGCGGACGTCCGCGCAAG                  | whiB7-mtb-500_fwd              | whiB7-KO Mtb mutant construction                                |
| 6, S9 | oLSQ56 9 | GTGATAAACTACCGCATTAAATGCTGCTGCC GACGGCC       | whiB7-mtb-500_rev              | whiB7-KO Mtb mutant construction                                |
| 6, S9 | oLSQ60 8 | CTGATCGGTACGCTGCTCGCCG                        | whiB7-KO-veri-F                | Validation primer to confirm removal of endogenous whiB7 allele |
| 6, S9 | oLSQ60 9 | AGTCCATTTGGCGCTCAGCTG                         | whiB7-KO-veri-R                | Validation primer to confirm removal of endogenous whiB7 allele |
| 6, S9 | oLSQ45 7 | CCTCTAGGGTCCCCAGCTGGCCGGCATCG GTGCCCGCA       | WhiB7+500-gibson-F             | Build whiB7 WT allele for complementation                       |
| 6, S9 | oLSQ45 8 | GTGGCAGGGCGGGGCGTAATCTATGCAACA GCATCCTTGCGCGG | WhiB7+500-gibson-R             | Build whiB7 WT allele for complementation                       |
| 6, S9 | oLSQ66 9 | CCTCTAGGGTCCCCAGCTGGCCGGCATCG GTGCCCGCA       | pwhiB7-whiB7fs-F1              | Build Mtb whiB7-fs(Gly64delG) allele for complementation        |
| 6, S9 | oINP514  | ATCCTATGCCAGCTGGACGC                          | whiB7 Amplification Fwd Primer | whiB7 Amplification Fwd Primer                                  |
| 6, S9 | oINP546  | CCCGCAAGCTGGAACAATAC                          | whiB7 Amplification Rev Primer | whiB7 Amplification Rev Primer                                  |

1057  
1058  
1059

**Supplemental Table 2: Additional acquired drug sensitivity candidates**

| Gene            | Drug    | Mutation    | Sublineage                                                                                           | Occurrences | Notes                                                                                        |
|-----------------|---------|-------------|------------------------------------------------------------------------------------------------------|-------------|----------------------------------------------------------------------------------------------|
| <i>whiB7</i>    | CLR     | Leu18 fs    | lineage2.2.1: 100/6719                                                                               | 100         |                                                                                              |
| <i>whiB7</i>    | CLR     | Ala60fs     | lineage4: 2/814, lineage4.8: 18/3234                                                                 | 20          |                                                                                              |
| <i>hflX</i>     | CLR     | Glu20 6fs   | lineage4.9: 93/2941                                                                                  | 93          |                                                                                              |
| <i>hflX</i>     | CLR     | Arg23 7fs   | lineage4.9: 12/2941                                                                                  | 12          |                                                                                              |
| <i>hflX</i>     | CLR     | Gln36 7Stop | lineage4.2.1: 117/666, lineage4.6: 2/187                                                             | 119         |                                                                                              |
| <i>rv23 69c</i> | CLR     | Arg57 fs    | None: 12/3241                                                                                        | 12          | Possible polar effect with <i>phoH1</i>                                                      |
| <i>rv23 69c</i> | CLR     | Cys58 fs    | lineage3: 11/3537                                                                                    | 11          | Possible polar effect with <i>phoH1</i>                                                      |
| <i>rv23 69c</i> | CLR     | Gln72 Stop  | lineage1.2.1: 2/164, lineage1.2.1.3: 78/435                                                          | 80          | Possible polar effect with <i>phoH1</i>                                                      |
| <i>mm pL5</i>   | CLR/BDQ | Asp13 2fs   | None: 48/3241, lineage1.2.1: 1/164, lineage2.2.1: 5/6719, lineage4.1.1.3: 2/1178, lineage4.8: 1/3166 | 57          | Also observed by Merker et al., may also confer clofazamine sensitivity(Merker et al., 2020) |
| <i>mm pL5</i>   | CLR/BDQ | Arg20 2fs   | lineage4: 55/807                                                                                     | 55          | Also observed by Merker et al., may also confer clofazamine sensitivity(Merker et al., 2020) |
| <i>mm pL5</i>   | CLR/BDQ | Tyr30 0Stop | lineage1.1.1: 4/54, lineage1.1.1.1: 75/108, lineage4.8: 1/3166                                       | 80          | Also observed by Merker et al., may also confer clofazamine sensitivity(Merker et al., 2020) |
| <i>mm pL5</i>   | CLR/BDQ | Pro49 8fs   | lineage2.2.2: 1/747, lineage4.6: 59/187                                                              | 60          | Also observed by Merker et al., may also confer clofazamine sensitivity(Merker et al., 2020) |
| <i>rv38 22</i>  | BDQ     | Leu12 3fs   | None: 40/2223                                                                                        | 40          |                                                                                              |
| <i>rv38 22</i>  | BDQ     | Tyr20 8fs   | lineage4: 4/814, lineage4.8: 36/3234                                                                 | 40          |                                                                                              |

1060  
1061  
1062  
1063  
1064



- 1065 **Supplemental Data 1:** MAGECK screen results  
1066
- 1067 **Supplemental Data 2:** Chemical-genetic hit overlap between CRISPRi and TnSeq  
1068
- 1069 **Supplemental Data 3:** RNA-seq differential expression analysis results for Mtb *mtrA* CRISPRi knockdown  
1070 mutant  
1071
- 1072 **Supplemental Data 4:** Full list of NCBI accession numbers of WGS sequences used in this study  
1073
- 1074 **Supplemental Data 5:** List of identified *tsnR* mutations from clinical isolate WGS database and co-  
1075 occurrence with *rplC* Cys154Arg Linezolid-resistant isolates  
1076
- 1077 **Supplemental Data 6:** List of identified *bacA* mutations from clinical isolate WGS database  
1078
- 1079 **Supplemental Data 7:** List of identified *ettA* mutations from clinical isolate WGS database  
1080
- 1081 **Supplemental Data 8:** List of identified *whiB7* mutations from clinical isolate WGS database  
1082
- 1083 **Supplemental Data 9:** Acquired drug resistance candidate mutations  
1084

## 1085 MATERIALS AND METHODS

### 1086 Bacterial strains

1087 Mtb strains are derivatives of H37Rv unless otherwise noted. A reference set of Mtb clinical strains was  
1088 obtained from the Belgian Coordinated Collections of Microorganisms (BCCM) (Borrell et al., 2019). *E. coli*  
1089 strains are derivatives of DH5alpha (NEB).

### 1090 Mycobacterial cultures

1092 Mtb was grown at 37°C in Difco Middlebrook 7H9 broth or on 7H10 agar supplemented with 0.2% glycerol  
1093 (7H9) or 0.5% glycerol (7H10), 0.05% Tween-80, 1X oleic acid-albumin-dextrose-catalase (OADC) and the  
1094 appropriate antibiotics. Where required, antibiotics or small molecules were used at the following  
1095 concentrations: kanamycin at 20 µg/mL; anhydrotetracycline (ATc) at 100 ng/mL, and zeocin at 20 µg/mL.  
1096 Mtb cultures were grown standing in tissue culture flasks (unless otherwise indicated) at 37°C, 5% CO<sub>2</sub>.

### 1097 Generation of individual CRISPRi and CRISPRi-resistant complementation strains

1098 Individual CRISPRi plasmids were cloned as previously described in (Bosch et al., 2021) using Addgene  
1099 plasmid #166886. Briefly, the CRISPRi plasmid backbone was digested with BsmBI-v2 (NEB #R0739L) and  
1100 gel purified. sgRNAs were designed to target the non-template strand of the target gene ORF. For each  
1101 individual sgRNA, two complementary oligonucleotides with appropriate sticky end overhangs were  
1102 annealed and ligated (T4 ligase NEB # M0202M) into the BsmBI-digested plasmid backbone. Successful  
1103 cloning was confirmed by Sanger sequencing.

1104 Individual CRISPRi plasmids were then electroporated into Mtb. Electrocompetent cells were obtained as  
1105 described in (Murphy et al., 2015). Briefly, a WT Mtb culture was expanded to an OD<sub>600</sub>=0.8-1.0 and pelleted  
1106 (4,000 x g for 10 min). The cell pellet was washed three times in sterile 10% glycerol. The washed bacilli  
1107 were then resuspended in 10% glycerol in a final volume of 5% of the original culture volume. For each  
1108 transformation, 100 ng plasmid DNA and 100 µL of electrocompetent mycobacteria were mixed and  
1109 transferred to a 2 mm electroporation cuvette (Bio-Rad #1652082). Where necessary, 100 ng of plasmid  
1110 pRL19 (Addgene plasmid #163634) was also added. Electroporation was performed using the Gene Pulser  
1111 X cell electroporation system (Bio-Rad #1652660) set at 2500 V, 700 Ω and 25 µF. Bacteria were recovered  
1112 in 7H9 for 24 hours. After the recovery incubation, cells were plated on 7H10 agar supplemented with the  
1113 appropriate antibiotic to select for transformants.

1114 To complement CRISPRi-mediated gene knockdown, synonymous mutations were introduced into the  
1115 complementing allele at both the protospacer adjacent motif (PAM) and seed sequence (the 8-10 most  
1116 PAM-proximal bases at the 3' end of the sgRNA targeting sequence) to prevent sgRNA targeting. Silent  
1117 mutations were introduced into Gibson assembly oligoes to generate these "CRISPRi resistant" (CR)  
1118 alleles. Complementation alleles were expressed from the endogenous or hsp60 promoters in a Tweety or  
1119 Giles integrating plasmid backbone, as indicated in each figure legend and/or the relevant plasmid maps  
1120 (**Supplemental Table 1**). These alleles were then transformed into the corresponding CRISPRi knockdown  
1121 strain, with the pRL40 Giles Int expressing plasmid where necessary.

1122 The full list of sgRNA targeting sequences and complementation plasmids can be found in **Supplemental**  
1123 **Table 1**.

### 1124 Construction of the $\Delta whiB7$ and complemented Mtb strains

1125 The Mtb  $\Delta whiB7$  strain was constructed by allelic exchange using a RecET-mediated recombineering  
1126 approach as previously described (Murphy et al., 2015). Deletion of *whiB7* was confirmed by PCR and  
1127 whole-genome sequencing (BGI). The  $\Delta whiB7$  strain was complemented by reintroducing a wild-type copy  
1128 of *whiB7* under the control of its native promoter at the *attL5* site of the Mtb genome. Plasmid sequences  
1129 and maps can be found in **Supplemental Table 1**.

1137  
1138  
1139  
1140  
1141  
1142  
1143  
1144  
1145  
1146  
1147  
1148  
1149  
1150  
1151  
1152  
1153  
1154  
1155  
1156  
1157  
1158  
1159  
1160  
1161  
1162  
1163  
1164  
1165  
1166  
1167  
1168  
1169  
1170  
1171  
1172  
1173  
1174  
1175  
1176  
1177  
1178  
1179  
1180  
1181  
1182  
1183  
  
1184  
1185  
1186  
1187  
1188  
1189  
1190

## Pooled CRISPRi chemical-genetic screening

Chemical-genetic screens were initiated by thawing 5 X 1 mL (1 OD<sub>600</sub> unit per mL) aliquots of the Mtb CRISPRi library (RLC12; Addgene #163954) and inoculating each aliquot into 19 mL 7H9 supplemented with kanamycin (10 µg/ml) in a vented tissue culture flask (T-75; Falcon #353136). The starting OD<sub>600</sub> of each culture was approximately 0.05. Cultures were expanded to OD<sub>600</sub>=1.5, pooled and passed through a 10 µm cell strainer (pluriSelect #43-50010-03) to obtain a single cell suspension. The single cell suspension was then treated with ATc (100 ng/mL final concentration) to initiate target pre-depletion. To generate 1 day pre-depletion culture, the single-cell suspension was diluted back to OD<sub>600</sub>=0.5 in a total volume of 40 mL 7H9. The remaining single-cell suspension was used to generate a 5-day pre-depletion culture, with a starting OD<sub>600</sub>=0.1 (40 mL; 100 ng/mL ATc). After 4 days, the 5-day pre-depletion start culture was further diluted back to a starting OD<sub>600</sub>=0.05 (40 mL; in 100 ng/mL ATc) and incubated for a further 5 days to generate the 10 day pre-depletion culture.

To initiate the chemical-genetic screen, we first harvested 10 OD<sub>600</sub> units of bacteria (~3x10<sup>9</sup> bacteria; ~30,000X coverage of the CRISPRi library) from the 1, 5, or 10-day CRISPRi library pre-depletion cultures as input controls. Triplicate cultures were then inoculated at OD<sub>600</sub>=0.05 in 10 ml 7H9 supplemented with ATc (100 ng/mL), kanamycin (10 µg/ml), and the indicated drug concentration or DMSO vehicle control (see **Supplemental Figure 1**). Pooled CRISPRi chemical-genetic screens were performed in vented tissue culture flasks (T-25; Falcon #353109). Cultures were outgrown for 14 days at 37°C, 5% CO<sub>2</sub>. ATc was replenished at 100 ng/mL at day 7. After 14 days outgrowth, OD<sub>600</sub> values were measured for all cultures to empirically determine the MIC for each drug. Samples from three descending doses of partially inhibitory drug concentrations were processed for genomic DNA extraction, defined as “High”, “Medium”, and “Low” in **Supplemental Figure 1**, as described below. Due to an error during genomic DNA extraction, EMB 1,804 nM (“Med”) Day 1 data reflects two biological replicates, one of which was sequenced twice to produce 3 replicates. Additionally, the 10-day sample was lost for the 221 nM (“Med”) streptomycin screen.

## Genomic DNA extraction and library preparation for Illumina sequencing

Genomic DNA was isolated from bacterial pellets using the CTAB-lysozyme method as previously described (Bosch et al., 2021). Briefly, Mtb pellets (5-30 OD<sub>600</sub> units) were resuspended in 1 mL of PBS + 0.05% Tween-80. Cell suspensions were centrifuged for 5 min at 4,000 x g and the supernatant was removed. Pellets were resuspended in 800 µL TE buffer (10 mM Tris pH 8.0, 1 mM EDTA) + 15 mg/mL lysozyme (Alfa Aesar J60701-06) and incubated at 37°C for 16 hours. Next, 70 µL of 10% SDS (Promega V6551) and 5 µL of proteinase K (20 mg/mL, Thermo Fisher 25530049) were added and samples were incubated at 65°C for 30 min. Subsequently, 100 µL of 5 M NaCl and 80 µL of 10% CTAB (Sigma Aldrich H5882) were added and samples were incubated for an additional 30 min at 65°C. Finally, 750 µL of ice-cold chloroform was added and samples were mixed. After centrifugation at 16,100 x g and extraction of the aqueous phase, samples were removed from the biosafety level 3 facility. Samples were then treated with 25 µg of RNase A (Bio Basic RB0474) for 30 min at 37°C followed by an extraction with phenol:chloroform:isoamyl alcohol (pH=8.0, 25:24:1 Thermo Fisher BP1752I-400) then chloroform. Genomic DNA was precipitated from the final aqueous layer (600 µL) with the addition of 10 µL of 3 M sodium acetate and 360 µL of isopropanol. DNA pellets were spun at 21,300 x g for 30 min at 4°C and washed 2X with 750 µL of 80% ethanol. Pellets were dried and resuspended with elution buffer (Qiagen 19086) before spectrophotometric quantification.

The concentration of isolated genomic DNA was quantified using the DeNovix dsDNA high sensitivity assay (KIT-DSDNA-HIGH-2; DS-11 Series Spectrophotometer / Fluorometer). Next, the sgRNA-encoding region was amplified from 500 ng genomic DNA with 17 cycles of PCR using NEBNext Ultra II Q5 master Mix (NEB #M0544L). Each PCR reaction contained a pool of forward primers (0.5 µM final concentration) and a unique indexed reverse primer (0.5 µM) (Bosch et al., 2021). Forward primers contain a P5 flow cell attachment sequence, a standard Read1 Illumina sequencing primer binding site, and custom stagger sequences to guarantee base diversity during Illumina sequencing. Reverse primers contain a P7 flow cell

1191 attachment sequence, a standard Read2 Illumina sequencing primer binding site, and unique barcodes to  
1192 allow for sample pooling during deep sequencing.

1193 Following PCR amplification, each ~230 bp amplicon was purified using AMPure XP beads (Beckman–  
1194 Coulter #A63882) using one-sided selection (1.2 x). Bead-purified amplicons were further purified on a  
1195 Pippin HT 2% agarose gel cassette (target range 180-250 bp; Sage Science #HTC2010) to remove carry-  
1196 over primer and genomic DNA. Eluted amplicons were quantified with Qubit 2.0 Fluorometer (Invitrogen)  
1197 and amplicon size and purity was quality controlled by visualization on an Agilent 2100 Bioanalyzer (high  
1198 sensitivity chip; Agilent Technologies #5067-4626). Next, individual PCR amplicons were multiplexed into  
1199 10 nM pools and sequenced on an Illumina sequencer according to the manufacturer's instructions. To  
1200 increase sequencing diversity, a PhiX spike-in of 2.5-5% was added to the pools (PhiX Sequencing Control  
1201 v3; Illumina # FC-110-3001). Samples were run on the Illumina NextSeq 500, HiSeq 2500, or NovaSeq  
1202 6000 platform (Single-Read 1 x 85 cycles and 6 x i7 index cycles).

## 1203 **NGS data processing, analysis, and hit calling**

1204  
1205 Sequencing counts were obtained in the manner described by (Bosch et al., 2021). Counts were normalized  
1206 for sequencing depth and an sgRNA limit of detection (LOD) cut-off was set at 100 counts in the DMSO  
1207 condition. Only sgRNAs that made the LOD cut-off (i.e. counts > 100) were analyzed further. Replicate  
1208 screens were quality controlled to ensure that the Pearson correlation was >0.95 for both the non-targeting  
1209 sgRNA sets and essential-gene targeting sgRNA (Dejesus et al., 2017) sets between each replicate screen.  
1210 sgRNA counts were analyzed using MAGeCK analysis method (version 0.5.9.2) in python (version  
1211 2.7.16) (Li et al., 2014). Gene-level log<sub>2</sub> fold change (L2FC) was calculated using the 'alphamedian'  
1212 approach specified with the 'gene-lfc-method' parameter, which estimates the gene-level L2FC as the  
1213 median of sgRNAs that are ranked above the default cut off in the Robust Rank Analysis used by MAGeCK.  
1214 Negative control sgRNAs in the library were used to calculate the null distribution and to normalize counts  
1215 using the '--control-sgrna' and '--normalization control' parameters, respectively. MAGeCK gene summary  
1216 output results can be found in **Supplemental Data 1**.

1217  
1218 Unless otherwise specified, a gene was determined to be a hit in a given condition if it had an FDR < 0.01  
1219 and a L2FC < -1 in the negative selection or an FDR < 0.01 and a L2FC > 1 in the positive selection.

## 1220 **Clustered heatmap**

1221  
1222  
1223 L2FC values from the MAGeCK output (**Supplemental Data 1**) were used for the generation of clustered  
1224 heatmap. Genes were clustered based on Euclidean distance using the Ward clustering criterion. Only  
1225 genes that hit (FDR < 0.01; n=676 genes) in two or more conditions are included in the heatmap. A gene's  
1226 L2FC was only represented on the heatmap if the FDR was below 0.01 in the specific treatment condition;  
1227 genes not meeting this significance threshold are shown as white in that treatment condition. Treatment  
1228 conditions were clustered based on Pearson correlation using the Ward criterion. Clustering was done using  
1229 the package hclust and the heatmap was generated using the heatmap.2 function from the package gplots  
1230 (R version 4.0.5).

## 1231 **Physicochemical property analysis**

1232  
1233  
1234 The physicochemical properties shown in **Supplemental Data 3D** were obtained from PubChem  
1235 (<https://pubchem.ncbi.nlm.nih.gov/>) and, where applicable, were computed by Cactvs 3.4.8.18. The L2FC  
1236 distributions correspond to the values for the following mAGP-associated genes found in (Jankute et al.,  
1237 2015; Maitra et al., 2019): *rv1302*, *rv3265c*, *rv3782*, *rv3808c*, *rv1017c*, *rv3806c*, *rv3807c*, *rv3790*, *rv3791*,  
1238 *rv3792*, *rv3794*, *rv3795*, *rv2673*, *rv0236c*, *rv3805c*, *rv3631*, *rv3779*, *rv2524c*, *rv3285*, *rv3280*, *rv0904c*,  
1239 *rv2247*, *rv1483*, *rv2483*, *rv0533c*, *rv3799c*, *rv2245*, *rv2246*, *rv1483*, *rv0635*, *rv0636*, *rv0637*, *rv1484*,  
1240 *rv0645c*, *rv0644c*, *rv0643c*, *rv0642c*, *rv0470c*, *rv3392c*, *rv0503c*, *rv3801c*, *rv3800c*, *rv2509*, *rv0206c*,  
1241 *rv3804c*, *rv3802c*, *rv3436c*, *rv3441c*, *rv1018c*, *rv1315*, *rv0482*, *rv2152c*, *rv2155c*, *rv2158c*, *rv2157c*,  
1242 *rv2156c*, *rv2153c*, *rv3818*, *rv3712*, *rv3713*, *rv2201*, *rv3910*, *rv2154c*, *rv0050*, *rv3682*, *rv3330*, *rv2911*,

1243 *rv0116c, rv2518c, rv1433, rv0192, rv0483, rv1477, rv1478, rv2190c, rv0867c, rv1009, rv1884c, rv2389c,*  
 1244 *rv2450c.*

### 1245 **Antibacterial activity measurements**

1246  
 1247 All compounds were dissolved in DMSO (VWR V0231) and dispensed using an HP D300e Digital  
 1248 Dispenser in a 384 well plate format. DMSO did not exceed 1% of the final culture volume and was  
 1249 maintained at the same concentration across all samples. CRISPRi strains were growth-synchronized and  
 1250 pre-depleted in the presence of ATc (100 ng/mL) for 5 days prior to assay for MIC analysis. Cultures were  
 1251 then back diluted to a starting OD<sub>580</sub> of 0.05 and 50 µL of cell suspension was plated in technical triplicate in  
 1252 wells containing the test compound and fresh ATc (100 ng/mL). For checkerboard assays and MIC assays  
 1253 (non-CRISPRi) cultures were growth-synchronized to late log-phase and back-diluted to an OD<sub>600</sub> of 0.025  
 1254 prior to plating (no ATc). Plates were incubated at 37°C with 5% CO<sub>2</sub>. OD<sub>600</sub> was evaluated using a Tecan  
 1255 Spark plate reader at 10-14 days post-plating and percent growth was calculated relative to the vehicle  
 1256 control for each strain. IC<sub>50</sub> measurements were calculated using a non-linear fit in GraphPad Prism.

1257  
 1258 To quantify growth phenotypes on 7H10 agar, 10-fold serial dilutions of Mtb cultures (OD<sub>600</sub> = 0.6) were  
 1259 spotted on 7H10 agar containing drugs at the indicated concentrations and/or ATc at 100 ng/mL. Plates  
 1260 were incubated at 37°C and imaged after two weeks.

### 1261 **Antimicrobial compounds**

1262  
 1263 All compounds used in this study were purchased from commercial manufacturers with the exception of  
 1264 GSK3011724A, which was synthesized at the Memorial Sloan Kettering Organic Synthesis core as  
 1265 described in (Kumar et al., 2018).  
 1266  
 1267

| Antibiotic                 | Use                                  | Abbreviation | Product number                  |
|----------------------------|--------------------------------------|--------------|---------------------------------|
| Amikacin                   | Axenic culture                       | AMK          | A0365900 (Sigma Aldrich)        |
| Anhydrotetracycline        | Axenic culture                       | ATc          | AC233135000 (Fisher Scientific) |
| Azithromycin               | Mouse efficacy studies               | AZM          | Epic Pharma Oral Suspension     |
| Azithromycin-dihydrate     | Axenic culture                       | AZM          | PZ0007 (Sigma Aldrich)          |
| Bedaquiline                | Axenic culture                       | BDQ          | AdooQ Biosciences (A12327-5)    |
| Capreomycin Sulfate        | Axenic culture                       | CAP          | PHR1716 (Sigma Aldrich)         |
| Chloramphenicol            | Axenic culture                       | CHL          | C-105-5 (GoldBio)               |
| Clarithromycin             | Axenic culture                       | CLR          | C9742 (Sigma Aldrich)           |
| Clarithromycin             | Mouse efficacy studies               | CLR          | Sandoz Tablets                  |
| Clindamycin hydrochloride  | Axenic culture                       | CLI          | C-175-10 (GoldBio)              |
| Clofazimine                | Axenic culture                       | CLO          | TCC2866 (VWR)                   |
| Ethambutol dihydrochloride | Axenic culture                       | EMB          | E4630 (Sigma Aldrich)           |
| Fusidic acid sodium salt   | Axenic culture                       | FA           | F0881 (Sigma Aldrich)           |
| GSK3011724A                | Axenic culture, macrophage infection | GSK'724A     | NA                              |
| Isoniazid                  | Axenic culture                       | INH          | I3377 (Sigma Aldrich)           |
| Kanamycin                  | Axenic culture                       | KAN          | K-120-50 (GoldBio)              |
| Levofloxacin               | Axenic culture                       | LFX          | 28266 (Sigma Aldrich)           |
| Lincomycin hydrochloride   | Axenic culture                       | LNC          | 62143 (Sigma Aldrich)           |
| Linezolid                  | Axenic culture                       | LZD          | SML1290 (Sigma Aldrich)         |
| Moxifloxacin               | Axenic culture                       | MFX          | Y0000703 (Sigma Aldrich)        |
| Rifampicin                 | Axenic culture, macrophage infection | RIF          | R0079 (TCI)                     |

| Rifampicin               | Mouse efficacy studies | RIF | Akorn Capsules          |
|--------------------------|------------------------|-----|-------------------------|
| Streptomycin sulfate     | Axenic culture         | STR | S-150-100 (GoldBio)     |
| Sutezolid                | Axenic culture         | SZD | PZ0035 (Sigma Aldrich)  |
| Telithromycin            | Axenic culture         | TLM | SML2162 (Sigma Aldrich) |
| Tigecycline hydrate      | Axenic culture         | TGC | PZ0021 (Sigma Aldrich)  |
| Vancomycin hydrochloride | Axenic culture         | VAN | V2002 (Sigma Aldrich)   |
| Zeocin                   | Axenic culture         | ZEO | J67140-8EQ (Alfa Aesar) |

1268

1269

## Bone marrow-derived macrophage infections

1270

1271

1272

1273

1274

1275

1276

1277

1278

1279

1280

1281

1282

1283

1284

1285

1286

1287

1288

1289

1290

1291

1292

1293

1294

Bone marrow-derived macrophages (BMDMs) were differentiated from wild-type, female C57BL/6NTAC mice (Taconic Farms, 6-8 weeks of age). All animal work was performed in accordance with the Guide for the Care and Use of Laboratory Animals of the National Institutes of Health, with approval from the Institutional Animal Care and Use Committee of Rockefeller University. Femurs and tibias were harvested and crushed with a sterile mortar and pestle as described (Troupin et al., 2013). After red blood cell lysis and counter-selection of resident macrophages, bone marrow cells were incubated in the presence of DMEM (4.5 g/L glucose + L-glutamine + sodium pyruvate, Corning 10-013-CV) + 10% FBS (Sigma Aldrich F4135, Lot no. 17B189) + 15% conditioned L929 cell medium (LCM) and differentiated for 7 days at 37°C, 5% CO<sub>2</sub>. Macrophages were then lifted using gentle cell scraping. For infection assays, BMDMs were seeded in 96 well plates at 75,000 cells/well two days prior to infection. 16 hours prior to infection, fresh DMEM + 10% FBS + 10% LCM was added to cells, with or without IFN-γ (20 ng/mL, Gemini Biosciences 300-311P). Mtb cultures were synchronized to late log-phase (OD<sub>600</sub> 0.6-0.8). For infections with CRISPRi strains, cultures were pre-depleted with 100 ng/mL ATc for 24 hours prior to infection. Mtb pellets were washed with PBS (Thermo Fisher 14190144) + 0.05% Tyloxapol (Sigma Aldrich T0307) and single cell suspensions were generated by harvesting the suspended cells after gentle centrifugation (150 x g for 12 min). Cell culture medium was removed from the macrophages and replaced with Mtb-containing medium at a multiplicity of infection of MOI of 1:1. After four hours of infection at 37°C, media was removed and cells were washed 2X with PBS. Wells were replenished with fresh media with or without drug. DMSO was normalized to 0.2%. For CRISPRi infections, doxycycline (Sigma Aldrich D9891) was added at a concentration of 250 ng/mL to maintain target knockdown. For all infection assays, medium was replaced with fresh drug at day 3. At each indicated timepoint, after two PBS washes, cells were lysed with 100 μL of Triton X-100 in water (Sigma Aldrich X100). Lysates were titrated in PBS + 0.05% Tween-80 and plated on 7H10. CFU were enumerated after 21-28 days of outgrowth.

1295

## Selection of drug-resistant Mtb isolates

1296

1297

1298

1299

1300

1301

1302

1303

For the selection of linezolid-resistant H37Rv Mtb mutants, two independent cultures were started at an OD<sub>600</sub> of 0.001. After one week of outgrowth, cultures were pelleted and roughly 3x10<sup>9</sup> CFU were plated on complete 7H10 + 11.9 μM linezolid. Plates were incubated for 24 days. Colonies were picked and grown in complete 7H9 + 11.9 μM linezolid. Genomic DNA was harvested as described above? And Sanger sequencing was performed on purified PCR amplicons of *rrl* (23s rRNA) and *rpIC* using the primers listed (**Supplemental Table 1**). Genomic DNA was also submitted for WGS (BGI, Illumina HiSeq X Ten platform).

1304

1305

1306

1307

1308

1309

1310

1311

1312

1313

For selection of resistant isolates for the lineage 1.2.1 strain, thirty independent cultures of 20 mL were started at an OD<sub>600</sub> of 0.001. After growth to log-phase (OD<sub>600</sub> 0.5-0.6) cultures were pelleted and plated on complete 7H10 + antibiotic (CLR = 10 μg/mL, RIF = 0.5 μg/mL). After 28-35 days, colonies were enumerated. CLR-resistant colonies occurred at a frequency of 1.7 x 10<sup>-8</sup> and were picked and grown in complete 7H9 + CLR (4 μg/mL). Samples were heat lysed and *whiB7* and *rrl* were PCR amplified and sequenced using the primers listed (**Supplemental Table 1**). Sanger sequencing revealed a wild-type *whiB7* locus in all (n=101) clarithromycin-resistant isolates. Instead, clarithromycin resistance was conferred by a variety of base substitutions in the 23S rRNA (**Supplemental Figure 10C,D**). Select samples were cultured further and purified genomic DNA was submitted for WGS.

1314  
1315  
1316  
1317  
1318  
1319  
1320  
1321  
1322  
1323  
1324  
1325  
1326  
1327  
1328  
1329  
1330  
1331  
1332  
1333  
1334  
1335  
1336  
1337  
1338  
1339  
1340  
1341  
1342  
1343  
1344  
1345  
1346  
1347  
1348  
1349  
1350  
1351  
1352  
1353  
1354  
1355  
1356  
1357  
1358  
1359  
1360  
1361  
1362  
1363  
1364  
1365  
1366  
1367  
1368

## Total RNA extraction and qRT-PCR

Total RNA extraction was performed as previously described (Bosch et al., 2021). Briefly, 2 OD<sub>600</sub> units of bacteria were added to an equivalent volume of GTC buffer (5M guanidinium thiocyanate, 0.5% sodium N-lauroylsarcosine, 25 mM trisodium citrate dihydrate, and 0.1M 2-mercaptoethanol), pelleted by centrifugation, resuspended in 1 mL TRIzol (Thermo Fisher Scientific; #15596026) and lysed by zirconium bead beating (MP Biomedicals; #116911050). 0.2 mL chloroform was added to each sample and samples were frozen at -80°C. After thawing, samples were centrifuged to separate phases, and the aqueous phase was purified by Direct-zol RNA miniprep (Zymo Research; # R2052). Residual genomic DNA was removed by TURBO DNase treatment (Invitrogen Ambion; # AM2238). After RNA cleanup and concentration (Zymo Research; #R1017), 3 µg of RNA per sample was reverse transcribed into cDNA with random hexamers (Thermo Fisher Scientific; # 18-091-050) following manufacturer's instructions. RNA was removed by alkaline hydrolysis and cDNA was purified with PCR clean-up columns (Qiagen; #28115). Next, knockdown of the targets was quantified by SYBR green dye-based quantitative real-time PCR (Applied Biosystems; #4309155) on a Quantstudio System 5 (ThermoFisher Scientific; #A28140) using gene-specific qPCR primers (5 µM), normalized to *sigA* (*rv2703*) and quantified by the  $\Delta\Delta C_t$  algorithm. All gene-specific qPCR primers were designed using the PrimerQuest tool from IDT (<https://www.idtdna.com/PrimerQuest/Home/Index>) and then validated for efficiency and linear range of amplification using standard qPCR approaches. Specificity was confirmed for each validated qPCR primer pair through melting curve analysis.

## RNA-seq cDNA library construction and deep sequencing

Triplicate cultures were grown to mid-log phase in 7H9 and diluted back to OD<sub>600</sub>=0.2 in 7H9 in the presence or the absence of ATc (100 ng/mL). Cultures were incubated for 48 hours, after which total RNA was extracted as described in "Total RNA extraction and qRT-PCR." Following RNA cleanup (Zymo Research; #R1017), 2 µg total RNA for each sample was depleted for rRNA using a Ribominus Transcriptome Isolation Kit (Yeast and Bacteria, Invitrogen, K1550-03). Following rRNA depletion, RNA was concentrated using an RNA Clean and Concentration-5 kit (Zymo Research, R1013). RNA quality was then confirmed by Bioanalyzer (Agilent RNA 6000 Pico kit, 5067-1513).

We used the NEB Next Ultra II Directional RNA Library Prep Kit (NEB, E7760 and E7765) to prepare cDNA libraries, following manufacturer's instructions. Briefly, 150 ng of rRNA-depleted RNA was subjected to fragmentation by incubating samples at 94°C for 20 min, followed by first strand cDNA synthesis (10 minutes at 25°C, 50 minutes at 42°C, 15 minutes at 70°C, hold at 4°C). Second-strand synthesis was performed at 16°C for 1.5 hours. DNA purification was performed with AMPure XP beads (Beckman Coulter, A63881). End repair was performed for 30 minutes at 20°C, followed by 30 minutes at 65°C. Repaired dsDNA was adaptor ligated (15 minutes at 37°C) and purified with AMPure XP beads. Eluted DNA was amplified by PCR using NGS primers supplied with the kit (NEBNext Multiplex Oligos for Illumina, Index Primers Set 1 and 2, E7335S, E7500S) for 12 cycles of amplification. Amplicons were purified with AMPure XP beads, quantified by Qubit dsDNA HS Assay kit (ThermoFisher Scientific, Q32851), and quality controlled by BioAnalyzer (Agilent DNA 1000, 5067-1504). RNAseq libraries were sequenced on an Illumina NextSeq 500 (mid-output, 75 bp paired-end read).

## Processing and analysis of RNA-seq data

Raw FASTQ files were aligned to the H37Rv genome (NC\_018143.2) using Rsubread (version 2.0.1)(Liao et al., 2019) with default settings. Transcript abundances were calculated by processing the resulting BAM files with the summarizeOverlaps function of the R package GenomicAlignments (version 1.22.1)(Lawrence et al., 2013). Overlaps were calculated in the "Union" mode, ensuring reads were counted only if they overlap a portion of a single gene/feature. 16S, 23S, and 5S rRNA features (RVBD6018, 6019, and 6020, respectively) were manually removed from the count data to prevent confounding downstream differential gene expression analysis. Differential expression analysis was conducted using DESeq2 (version 1.30.1)(Love et al., 2014) with default parameters.

1369  
1370  
1371  
1372  
1373  
1374  
1375  
1376  
1377  
1378  
1379  
1380  
1381  
1382  
1383  
1384  
1385  
1386  
1387  
1388  
1389  
1390  
1391  
1392  
1393  
1394  
1395  
1396  
1397  
1398  
1399  
1400  
1401  
1402  
1403  
1404  
1405  
1406  
1407  
1408  
1409  
1410  
1411  
1412  
1413  
1414  
1415  
1416  
1417  
1418  
1419  
1420  
1421  
1422

## Cell wall permeability assay

Cell envelope permeability was determined using the ethidium bromide (EtBr) uptake assay as previously described (Xu et al., 2017). Briefly, mid-log-phase Mtb cultures were washed once in PBS + 0.05% Tween-80 and adjusted to OD<sub>600</sub>=0.8 in PBS supplemented with 0.4% glucose. 100 µL of bacterial suspension was added to a black 96-well clear-bottomed plate (Costar). After this, 100 µL of 2 µg/mL EtBr in PBS supplemented with 0.4% glucose was added to each well. EtBr fluorescence was measured (excitation: 530 nm/emission: 590 nm) at 1 min intervals over a course of 60 min. Experiments were performed in technical triplicate.

A similar assay was performed to determine envelope permeability to a fluorescent vancomycin analogue, except that: (1) the bacterial suspension was adjusted at OD<sub>600</sub>=0.4 in PBS supplemented with 0.4% glucose; (2) cells were incubated with 2 µg/mL BODIPY FL Vancomycin (Thermo Scientific, V34850); (3) 200 µL sample aliquots were taken at different time points, washed twice with PBS, resuspended in 200 µL PBS; and (4) fluorescence was measured (excitation: 485 nm/emission: 538 nm) and normalized to the OD<sub>600</sub> of the final bacterial suspension.

## Whole genome sequencing data aggregation, alignment, SNP calling and annotation

FASTQ data were downloaded from NCBI using the SRA Toolkit (version 2.9.6). A list of accession numbers of all analyzed FASTQ files is provided in **Supplemental Data 4**. FASTQ reads were aligned to the H37Rv genome (NC\_018143.2) and SNPs were called and annotated using Snippy (version 3.2-dev) using default parameters (minimum mapping quality of 60 in BWA, SAMtools base quality threshold of 20, minimum coverage of 10, minimum proportion of reads that differ from reference of 0.9 (Seemann, 2020). Mapping quality and coverage was further assessed using QualiMap with the default parameters (version 2.2.2-dev) (Okonechnikov et al., 2016). Samples with a mean coverage < 30, mean mapping quality ≤ 45, or GC content ≤ 50% or ≥ 70% were excluded. Spoligotypes were assigned using SpoTyping (version 2.1) (Xia et al., 2016). Drug resistance conferring SNPs were annotated using reference SNP lists from (Allix-Béguec et al., 2018; Sandgren et al., 2009) and Mykrobe v0.9.0 (Hunt et al., 2019).

Phylogenetic trees were built using FastTree (version 2.1.11 SSE3) (Price et al., 2010). A list of SNPs in essential genes was concatenated for the building phylogenetic trees. Indels, drug resistance-conferring SNPs, and SNPs in repetitive regions of the genome (PE/PPE genes, transposases and prophage genes) were excluded. Tree visualization was performed in iTol (<https://itol.embl.de/>).

## Sublineage identification

Mtb sublineages were assigned to each sample using a set of lineage identifying SNPs. Lineage identifying SNPs from (Coll et al., 2014; Palittapongarnpim et al., 2018) were combined and then reduced to a subset of synonymous SNPs occurring in essential genes. For each sample, the percentage of lineage identifying SNPs present was calculated for each possible sublineage. A threshold of 67% was set as the minimum percentage of sublineage identifying SNPs required in order to define a sublineage. For each sample, all sublineages meeting this threshold were then evaluated to determine if they formed a continuous line of descent from the highest sublineage to the lowest (e.g. lineage1 → lineage1.2 → lineage1.2.1 → lineage1.2.1.1). Samples with a continuous line of descent were assigned the most specific sublineage (e.g. lineage1.2.1.1). If the set of sublineages included other sublineages that did not fit within the line of descent, the sublineage call was marked as “not confident” and considered as an undetermined sublineage.



1423 **Mouse infection and drug treatment**

1424

1425 Female BALB/c mice (Charles Rivers Laboratory) 7-8 weeks old were infected with 100-200 CFU of Mtb  
1426 using a whole-body inhalation exposure system (Glas-Col). After 10 days (**Figure 6D, E**) or 14 days  
1427 (**Supplemental Figure 10H, I**), animals were randomly assigned to study groups and chemotherapy was  
1428 initiated. CLR and RIF were stirred in 0.5% CMC/0.5% Tween-80 to resuspend; INH was resuspended in  
1429 water. AZM was resuspended in water. Liquid drug formulations were administered once daily by oral  
1430 gavage for 14 consecutive days. After 13 days of drug treatment, blood samples of the mice were taken 1  
1431 hour and 24 hours post dosing (**Supplemental Figure 10J,K**). At designated time points (14 after starting  
1432 chemotherapy), mice were euthanized, and lungs and spleens were aseptically removed, homogenized in 1  
1433 mL PBS + 0.05% Tween-80 and plated on Middlebrook 7H11 agar supplemented with 10% OADC.  
1434 Colonies were counted after 4-6 weeks of incubation at 37°C. Mice were housed in groups of 5 in  
1435 individually ventilated cages inside a certified ABSL-3 facility and had access to water and food *ad libitum*  
1436 for the duration of the study. All experiments involving animals were approved by the Institutional Animal  
1437 Care and Use Committee of the Center for Discovery and Innovation.

1438

1439 **Drug quantitation in plasma by high pressure liquid chromatography coupled to tandem mass**  
1440 **spectrometry (LC-MS/MS)**

1441

1442 Neat 1 mg/mL DMSO stocks for rifampicin (RIF), azithromycin (AZM), and clarithromycin (CLR) were serial  
1443 diluted in 50/50 (acetonitrile/water) to create neat spiking stocks. Standards and quality controls were  
1444 created by adding 10 µL of spiking stock to 90 µL of drug free plasma. 10 µL of control, standard, quality  
1445 control, or study sample were added to 100 µL of 50/50 (acetonitrile/methanol) protein precipitation solvent  
1446 containing the stable labeled internal standards RIF-d8 (Toronto Research Chemicals; R508003), AZM-d5  
1447 (Toronto Research Chemicals; A927004) and CLR-13C-d3 (Cayman Chemical; 26678) at 10 ng/mL.  
1448 Extracts were vortexed for 5 min and centrifuged at 4,000 rpm for 5 min. 100 µL of supernatant of RIF  
1449 containing samples was combined with 5 µL of 75 mg/mL ascorbic acid to stabilize RIF. 100 µL of mixture  
1450 was combined with 100 µL of Milli-Q water prior to HPLC-MS/MS analysis. CD-1 mouse control plasma  
1451 (K<sub>2</sub>EDTA) was sourced from Bioreclamation. RIF, AZM, and CLR were sourced from Sigma Aldrich.

1452

1453 LC-MS/MS analysis was performed on a Sciex Applied Biosystems Qtrap 6500+ triple-quadrupole mass  
1454 spectrometer coupled to a Shimadzu Nexera X2 UHPLC system to quantify each drug in plasma.  
1455 Chromatography was performed on an Agilent SB-C8 (2.1 x 30 mm; particle size, 3.5 µm) using a reverse  
1456 phase gradient. Milli-Q deionized water with 0.1% formic acid was used for the aqueous mobile phase and  
1457 0.1% formic acid in acetonitrile for the organic mobile phase. Multiple-reaction monitoring of  
1458 precursor/product transitions in electrospray positive-ionization mode was used to quantify the analytes.  
1459 Sample analysis was accepted if the concentrations of the quality control samples were within 20% of the  
1460 nominal concentration. The compounds were ionized using ESI positive mode ionization and monitored  
1461 using masses RIF (823.50/791.60), AZM (749.38/591.30), CLR (748.38/158.20), RIF-d8 (831.50/799.60),  
1462 AZM-d5 (754.37/596.30), and CLR-d4 (752.33/162.10). Data processing was performed using Analyst  
1463 software (version 1.6.2; Applied Biosystems Sciex).

1464

1465 **DATA AVAILABILITY**

1466

1467 Raw sequencing data will be deposited to the Short Read Archive (SRA) under project number  
1468 PRJNA738381. All screen results are available in **Supplemental Data 1** and at [pebble.rockefeller.edu](http://pebble.rockefeller.edu).

## REFERENCES

- Abrahams, K.A., Chung, C.W., Ghidelli-Disse, S., Rullas, J., Rebollo-López, M.J., Gurcha, S.S., Cox, J.A.G., Mendoza, A., Jiménez-Navarro, E., Martínez-Martínez, M.S., et al. (2016). Identification of KasA as the cellular target of an anti-tubercular scaffold. *Nat. Commun.* 7.
- Adams, K.N., Takaki, K., Connolly, L.E., Wiedenhoft, H., Winglee, K., Humbert, O., Edelstein, P.H., Cosma, C.L., and Ramakrishnan, L. (2011). Drug tolerance in replicating mycobacteria mediated by a macrophage-induced efflux mechanism. *Cell* 145, 39–53.
- Alland, D., Steyn, A.J., Weisbrod, T., Aldrich, K., and Jacobs, W.R. (2000). Characterization of the *Mycobacterium tuberculosis* iniBAC promoter, a promoter that responds to cell wall biosynthesis inhibition. *J. Bacteriol.* 182, 1802–1811.
- Allix-Béguec, C., Arandjelovic, I., Bi, L., Beckert, P., Bonnet, M., Bradley, P., Cabibbe, A.M., Cancino-Muñoz, I., Caulfield, M.J., Chaiprasert, A., et al. (2018). Prediction of susceptibility to first-line tuberculosis drugs by DNA sequencing. *N. Engl. J. Med.* 379, 1403–1415.
- Alumasa, J.N., Manzanillo, P.S., Peterson, N.D., Lundrigan, T., Baughn, A.D., Cox, J.S., and Keiler, K.C. (2017). Ribosome Rescue Inhibitors Kill Actively Growing and Nonreplicating Persister *Mycobacterium tuberculosis* Cells. *ACS Infect. Dis.* 3, 634–644.
- Andries, K., Verhasselt, P., Guillemont, J., Göhlmann, H.W.H., Neefs, J.M., Winkler, H., Van Gestel, J., Timmerman, P., Zhu, M., Lee, E., et al. (2005). A diarylquinoline drug active on the ATP synthase of *Mycobacterium tuberculosis*. *Science* (80- ). 307, 223–227.
- Andries, K., Villellas, C., Coeck, N., Thys, K., Gevers, T., Vranckx, L., Lounis, N., De Jong, B.C., and Koul, A. (2014). Acquired resistance of *Mycobacterium tuberculosis* to bedaquiline. *PLoS One* 9.
- Antonelli, A., D'Andrea, M.M., Brenciani, A., Galeotti, C.L., Morroni, G., Pollini, S., Varaldo, P.E., and Rossolini, G.M. (2018). Characterization of *poxA*, a novel phenicol-oxazolidinone-tetracycline resistance gene from an MRSA of clinical origin. *J. Antimicrob. Chemother.* 73, 1763–1769.
- Bailey, T.L., Boden, M., Buske, F.A., Frith, M., Grant, C.E., Clementi, L., Ren, J., Li, W.W., and Noble, W.S. (2009). MEME Suite: Tools for motif discovery and searching. *Nucleic Acids Res.* 37.
- Balaban, N.Q., Helaine, S., Lewis, K., Ackermann, M., Aldridge, B., Andersson, D.I., Brynildsen, M.P., Bumann, D., Camilli, A., Collins, J.J., et al. (2019). Definitions and guidelines for research on antibiotic persistence. *Nat. Rev. Microbiol.* 17, 441–448.
- Banerjee, A., Dubnau, E., Quemard, A., Balasubramanian, V., Um, K.S., Wilson, T., Collins, D., De Lisle, G., and Jacobs, W.R. (1994). *inhA*, a gene encoding a target for isoniazid and ethionamide in *Mycobacterium tuberculosis*. *Science* (80- ). 263, 227–230.
- Batt, S.M., Minnikin, D.E., and Besra, G.S. (2020). The thick waxy coat of mycobacteria, a protective layer against antibiotics and the host's immune system. *Biochem. J.* 447, 1983–2006.
- Beckert, P., Hillemann, D., Kohl, T.A., Kalinowski, J., Richter, E., Niemann, S., and Feuerriegel, S. (2012). *rplC* T460C identified as a dominant mutation in linezolid-resistant *Mycobacterium tuberculosis* strains. *Antimicrob. Agents Chemother.* 56, 2743–2745.
- Bellerose, M.M., Baek, S.H., Huang, C.C., Moss, C.E., Koh, E.I., Proulx, M.K., Smith, C.M., Baker, R.E., Lee, J.S., Eum, S., et al. (2019). Common variants in the glycerol kinase gene reduce tuberculosis drug efficacy. *MBio* 10.
- Blondiaux, N., Moune, M., Desroses, M., Frita, R., Flipo, M., Mathys, V., Soetaert, K., Kiass, M., Delorme, V., Djaout, K., et al. (2017). Reversion of antibiotic resistance in *Mycobacterium tuberculosis* by spiroisoxazoline SMART-420. *Science* (80- ). 355, 1206–1211.
- Boël, G., Smith, P.C., Ning, W., Englander, M.T., Chen, B., Hashem, Y., Testa, A.J., Fischer, J.J., Wieden, H.J., Frank, J., et al. (2014). The ABC-F protein EtfA gates ribosome entry into the translation elongation cycle. *Nat. Struct. Mol. Biol.* 21, 143–151.
- Borrell, S., Trauner, A., Brites, D., Rigouts, L., Loiseau, C., Coscolla, M., Niemann, S., De Jong, B.,

- Yeboah-Manu, D., Kato-Maeda, M., et al. (2019). Reference set of *Mycobacterium tuberculosis* clinical strains: A tool for research and product development. *PLoS One* *14*, 1–12.
- Bosch, B., DeJesus, M.A., Poulton, N.C., Zhang, W., Engelhart, C.A., Zaveri, A., Lavalette, S., Ruecker, N., Trujillo, C., Wallach, J.B., et al. (2021). Genome-wide gene expression tuning reveals diverse vulnerabilities of *M. tuberculosis*. *Cell* *184*(17), 4579–4592.
- Bosne-David, S., Barro, V., Verde, S.C., Portugal, C., and David, H.L. (2000). Intrinsic resistance of *Mycobacterium tuberculosis* to clarithromycin is effectively reversed by subinhibitory concentrations of cell wall inhibitors. *J. Antimicrob. Chemother.* *46*, 391–395.
- Brunel, R., Descours, G., Durieux, I., Doublet, P., Jarraud, S., and Charpentier, X. (2018). KKL-35 exhibits potent antibiotic activity against legionella species independently of trans-translation inhibition. *Antimicrob. Agents Chemother.* *62*, 1–10.
- Burian, J., Yim, G., Hsing, M., Axerio-Cilies, P., Cherkasov, A., Spiegelman, G.B., and Thompson, C.J. (2013). The mycobacterial antibiotic resistance determinant WhiB7 acts as a transcriptional activator by binding the primary sigma factor SigA (RpoV). *Nucleic Acids Res.* *41*, 10062–10076.
- Campbell, E.A., Korzheva, N., Mustaev, A., Murakami, K., Nair, S., Goldfarb, A., and Darst, S.A. (2001). Structural mechanism for rifampicin inhibition of bacterial RNA polymerase. *Cell* *104*, 901–912.
- Carter, J.J. (2021). Quantitative measurement of antibiotic resistance in *Mycobacterium tuberculosis* reveals genetic determinants of resistance and susceptibility in a target gene approach. *BioRxiv*.
- Chakravorty, S., Lee, J.S., Cho, E.J., Roh, S.S., Smith, L.E., Lee, J., Kim, C.T., Via, L.E., Cho, S.N., Barry, C.E., et al. (2015). Genotypic susceptibility testing of *Mycobacterium tuberculosis* isolates for amikacin and kanamycin resistance by use of a rapid sloppy molecular beacon-based assay identifies more cases of low-level drug resistance than phenotypic Lowenstein-Jensen testin. *J. Clin. Microbiol.* *53*, 43–51.
- Chen, B., Boël, G., Hashem, Y., Ning, W., Fei, J., Wang, C., Gonzalez, R.L., Hunt, J.F., and Frank, J. (2013). EttA regulates translation by binding the ribosomal E site and restricting ribosome-tRNA dynamics. *Nat. Publ. Gr.*
- Choudhary, E., Thakur, P., Pareek, M., and Agarwal, N. (2015). Gene silencing by CRISPR interference in mycobacteria. *Nat. Commun.* *6*.
- Cohen, K.A., Stott, K.E., Munsamy, V., Manson, A.L., Earl, A.M., and Pym, A.S. (2020). Evidence for expanding the role of streptomycin in the management of drug-resistant mycobacterium tuberculosis. *Antimicrob. Agents Chemother.* *64*.
- Cokol, M., Kuru, N., Bicak, E., Larkins-Ford, J., and Aldridge, B.B. (2017). Efficient measurement and factorization of high-order drug interactions in *Mycobacterium tuberculosis*. *Sci. Adv.* *3*.
- Colangeli, R., Jedrey, H., Kim, S., Connell, R., Ma, S., Venkata, U.D.C., Chakravorty, S., Gupta, A., Sizemore, E.E., Diem, L., et al. (2018). Bacterial factors that predict relapse after tuberculosis therapy. *N. Engl. J. Med.* *379*, 823–833.
- Coll, F., McNerney, R., Guerra-Assunção, J.A., Glynn, J.R., Perdigo, J., Viveiros, M., Portugal, I., Pain, A., Martin, N., and Clark, T.G. (2014). A robust SNP barcode for typing *Mycobacterium tuberculosis* complex strains. *Nat. Commun.* *5*.
- Conradie, F., Diacon, A.H., Ngubane, N., Howell, P., Everitt, D., Crook, A.M., Mendel, C.M., Egzi, E., Moreira, J., Timm, J., et al. (2020). Treatment of Highly Drug-Resistant Pulmonary Tuberculosis. *N. Engl. J. Med.* *382*, 893–902.
- Couvin, D., David, A., Zozio, T., and Rastogi, N. (2019). Macro-geographical specificities of the prevailing tuberculosis epidemic as seen through SITVIT2, an updated version of the *Mycobacterium tuberculosis* genotyping database. *Infect. Genet. Evol.* *72*, 31–43.
- Dartois, V. (2014). The path of anti-tuberculosis drugs: From blood to lesions to mycobacterial cells. *Nat. Rev. Microbiol.* *12*, 159–167.
- Davis, T.D., Gerry, C.J., and Tan, D.S. (2014). General platform for systematic quantitative evaluation of

small-molecule permeability in bacteria. *ACS Chem. Biol.* 9, 2535–2544.

Dejesus, M.A., Gerrick, E.R., Xu, W., Park, S.W., Long, J.E., Boutte, C.C., Rubin, E.J., Schnappinger, D., Ehrhart, S., Fortune, S.M., et al. (2017). Comprehensive essentiality analysis of the *Mycobacterium tuberculosis* genome via saturating transposon mutagenesis. *MBio* 8.

Dick, T., and Dartois, V. (2018). TB drug susceptibility is more than MIC. *Nat. Microbiol.* 3, 971–972.

Domenech, P., Kobayashi, H., Levier, K., Walker, G.C., and Barry, C.E. (2009). *BacA*, an ABC transporter involved in maintenance of chronic murine infections with *Mycobacterium tuberculosis*. *J. Bacteriol.* 191, 477–485.

Duan, W., Li, X., Ge, Y., Yu, Z., Li, P., Li, J., Qin, L., and Xie, J. (2019). *Mycobacterium tuberculosis* Rv1473 is a novel macrolides ABC Efflux Pump regulated by *WhiB7*. *Future Microbiol.* 14, 47–59.

Faksri, K., Tan, J.H., Disratthakit, A., Xia, E., Prammananan, T., Suriyaphol, P., Khor, C.C., Teo, Y.Y., Ong, R.T.H., and Chairprasert, A. (2016). Whole-genome sequencing analysis of serially isolated multi-drug and extensively drug resistant *Mycobacterium tuberculosis* from Thai patients. *PLoS One* 11, 1–16.

Gorla, P., Plocinska, R., Sarva, K., Satsangi, A.T., Pandey, E., Donnelly, R., Dziadek, J., Rajagopalan, M., and Madiraju, M. V. (2018). *MtrA* Response Regulator Controls Cell Division and Cell Wall Metabolism and Affects Susceptibility of *Mycobacteria* to the First Line Antituberculosis Drugs. *Front. Microbiol.* 9, 2839.

Hicks, N.D., Yang, J., Zhang, X., Zhao, B., Grad, Y.H., Liu, L., Ou, X., Chang, Z., Xia, H., Zhou, Y., et al. (2018). Clinically prevalent mutations in *Mycobacterium tuberculosis* alter propionate metabolism and mediate multidrug tolerance. *Nat. Microbiol.* 3, 1032–1042.

Hicks, N.D., Giffen, S.R., Culviner, P.H., Chao, M.C., Dulberger, C.L., Liu, Q., Stanley, S., Brown, J., Sixsmith, J., Wolf, I.D., et al. (2020). Mutations in *dnaA* and a cryptic interaction site increase drug resistance in *Mycobacterium tuberculosis*. *PLoS Pathog.* 16, 1–28.

Hugonnet, J.E., Tremblay, L.W., Boshoff, H.I., Barry, C.E., and Blanchard, J.S. (2009). Meropenem-clavulanate is effective against extensively drug-resistant *Mycobacterium tuberculosis*. *Science* (80- ). 323, 1215–1218.

Hunt, M., Bradley, P., Lapierre, S.G., Heys, S., Thomsit, M., Hall, M.B., Malone, K.M., Wintringer, P., Walker, T.M., Cirillo, D.M., et al. (2019). Antibiotic resistance prediction for *Mycobacterium tuberculosis* from genome sequence data with mykrobe [version 1; peer review: 2 approved, 1 approved with reservations]. *Wellcome Open Res.* 4.

Jankute, M., Cox, J.A.G., Harrison, J., and Besra, G.S. (2015). Assembly of the *Mycobacterial* Cell Wall. *Annu. Rev. Microbiol.* 69, 405–423.

Jarlier, V., and Nikaido, H. (1994). *Mycobacterial* cell wall: Structure and role in natural resistance to antibiotics. *FEMS Microbiol. Lett.* 123, 11–18.

Jenner, L., Starosta, A.L., Terry, D.S., Mikolajka, A., Filonava, L., Yusupov, M., Blanchard, S.C., Wilson, D.N., and Yusupova, G. (2013). Structural basis for potent inhibitory activity of the antibiotic tigecycline during protein synthesis. *Proc. Natl. Acad. Sci. U. S. A.* 110, 3812–3816.

Johnson, E.O., LaVerriere, E., Office, E., Stanley, M., Meyer, E., Kawate, T., Gomez, J.E., Audette, R.E., Bandyopadhyay, N., Betancourt, N., et al. (2019). Large-scale chemical–genetics yields new *M. tuberculosis* inhibitor classes. *Nature* 571, 72–78.

Kannan, K., Kanabar, P., Schryer, D., Florin, T., Oh, E., Bahroos, N., Tenson, T., Weissman, J.S., and Mankin, A.S. (2014). The general mode of translation inhibition by macrolide antibiotics. *Proc. Natl. Acad. Sci. U. S. A.* 111, 15958–15963.

Kaur, S., Rana, V., Singh, P., Trivedi, G., Anand, S., Kaur, A., Gupta, P., Jain, A., and Sharma, C. (2016). Novel mutations conferring resistance to kanamycin in *Mycobacterium tuberculosis* clinical isolates from Northern India. *Tuberculosis* 96, 96–101.

Knight, Z.A., and Shokat, K.M. (2007). Chemical Genetics: Where Genetics and Pharmacology Meet. *Cell* 128, 425–430.

- Koh, E.-I., Ruecker, N., Proulx, M.K., Soni, V., Murphy, K.C., Papavinasasundaram, K.G., Reames, C.J., Trujillo, C., Zimmerman, M.D., Aslebagh, R., et al. (2021). Chemical-genetic interaction mapping links carbon metabolism and cell wall 1 structure to tuberculosis drug efficacy 2 3. *BioRxiv* 2021.04.08.439092.
- Krause, K.M., Serio, A.W., Kane, T.R., and Connolly, L.E. (2016). Aminoglycosides: An overview. *Cold Spring Harb. Perspect. Med.* 6, 1–18.
- Kumar, P., Capodagli, G.C., Awasthi, D., Shrestha, R., Maharaja, K., Sukheja, P., Li, S.G., Inoyama, D., Zimmerman, M., Liang, H.P.H., et al. (2018). Synergistic lethality of a binary inhibitor of mycobacterium tuberculosis kasA. *MBio* 9.
- LaMarre, J.M., Howden, B.P., and Mankin, A.S. (2011). Inactivation of the indigenous methyltransferase RlmN in *Staphylococcus aureus* increases linezolid resistance. *Antimicrob. Agents Chemother.* 55, 2989–2991.
- Larrouy-Maumus, G., Marino, L.B., Madduri, A.V.R., Ragan, T.J., Hunt, D.M., Bassano, L., Gutierrez, M.G., Moody, D.B., Pavan, F.R., and De Carvalho, L.P.S. (2016). Cell-envelope remodeling as a determinant of phenotypic antibacterial tolerance in mycobacterium tuberculosis. *ACS Infect. Dis.* 2, 352–360.
- Lawrence, M., Huber, W., Pagès, H., Aboyoun, P., Carlson, M., Gentleman, R., Morgan, M.T., and Carey, V.J. (2013). Software for Computing and Annotating Genomic Ranges. *PLoS Comput. Biol.* 9, 1–10.
- Lee, R.E., Hurdle, J.G., Liu, J., Bruhn, D.F., Matt, T., Scherman, M.S., Vaddady, P.K., Zheng, Z., Qi, J., Akbergenov, R., et al. (2014). Spectinamides: A new class of semisynthetic antituberculosis agents that overcome native drug efflux. *Nat. Med.* 20, 152–158.
- Lenaerts, A., Barry, C.E., and Dartois, V. (2015). Heterogeneity in tuberculosis pathology, microenvironments and therapeutic responses. *Immunol. Rev.* 264, 288–307.
- Li, W., Xu, H., Xiao, T., Cong, L., Love, M.I., Zhang, F., Irizarry, R.A., Liu, J.S., Brown, M., and Liu, X.S. (2014). MAGeCK enables robust identification of essential genes from genome-scale CRISPR/Cas9 knockout screens. *Genome Biol.* 15, 554.
- Liao, Y., Smyth, G.K., and Shi, W. (2019). The R package Rsubread is easier, faster, cheaper and better for alignment and quantification of RNA sequencing reads. *Nucleic Acids Res.* 47.
- Liu, J., Shi, W., Zhang, S., Hao, X., Maslov, D.A., Shur, K. V., Bekker, O.B., Danilenko, V.N., and Zhang, Y. (2019). Mutations in efflux pump Rv1258c (Tap) cause resistance to pyrazinamide, isoniazid, and streptomycin in *M. tuberculosis*. *Front. Microbiol.* 10, 1–7.
- Love, M.I., Huber, W., and Anders, S. (2014). Moderated estimation of fold change and dispersion for RNA-seq data with DESeq2. *Genome Biol.* 15, 1–21.
- Luna-Herrera, J., Reddy, V.M., Daneluzzi, D., and Gangadharam, P.R. (1995). Antituberculosis activity of clarithromycin. *Antimicrob. Agents Chemother.* 39, 2692–2695.
- Madsen, C.T., Jakobsen, L., Buriánková, K., Doucet-Populaire, F., Pernodet, J.L., and Douthwaite, S. (2005). Methyltransferase Erm(37) slips on rRNA to confer atypical resistance in *Mycobacterium tuberculosis*. *J. Biol. Chem.* 280, 38942–38947.
- Maitra, A., Munshi, T., Healy, J., Martin, L.T., Vollmer, W., Keep, N.H., and Bhakta, S. (2019). Cell wall peptidoglycan in *Mycobacterium tuberculosis*: An Achilles' heel for the TB-causing pathogen. *FEMS Microbiol. Rev.* 43, 548–575.
- Marín, A.V., Rastogi, N., Couvin, D., Mape, V., and Murcia, M.I. (2021). First approach to the population structure of *Mycobacterium tuberculosis* complex in the indigenous population in Puerto Nariño-Amazonas, Colombia. *PLoS One* 16.
- Marks, J., Kannan, K., Roncase, E.J., Klepacki, D., Kefi, A., Orelle, C., Vázquez-Laslop, N., and Mankin, A.S. (2016). Context-specific inhibition of translation by ribosomal antibiotics targeting the peptidyl transferase center. *Proc. Natl. Acad. Sci. U. S. A.* 113, 12150–12155.
- McNeil, M.B., Chettiar, S., Awasthi, D., and Parish, T. (2019). Cell wall inhibitors increase the accumulation of rifampicin in *Mycobacterium tuberculosis*. *Access Microbiol.* 1, e000006.

- Merker, M., Kohl, T.A., Barilar, I., Andres, S., Fowler, P.W., Chryssanthou, E., Ängeby, K., Jureen, P., Moradigaravand, D., Parkhill, J., et al. (2020). Phylogenetically informative mutations in genes implicated in antibiotic resistance in *Mycobacterium tuberculosis* complex. *Genome Med.* 12, 1–8.
- Morris, R.P., Nguyen, L., Gatfield, J., Visconti, K., Nguyen, K., Schnappinger, D., Ehrh, S., Liu, Y., Heifets, L., Pieters, J., et al. (2005). Ancestral antibiotic resistance in *Mycobacterium tuberculosis*. *Proc. Natl. Acad. Sci. U. S. A.* 102, 12200–12205.
- Murphy, K.C., Papavinasasundaram, K., and Sasseti, C.M. (2015). *Mycobacterial Recombineering*. In *Mycobacteria Protocols*, T. Parish, and D.M. Roberts, eds. (New York, NY: Springer New York), pp. 177–199.
- Netikul, T., Palittapongarnpim, P., Thawornwattana, Y., and Plitphongphanphim, S. (2021). Estimation of the global burden of *Mycobacterium tuberculosis* lineage 1. *Infect. Genet. Evol.* 104802.
- Nguyen, H.T., Wolff, K.A., Cartabuke, R.H., Ogwang, S., and Nguyen, L. (2010). A lipoprotein modulates activity of the MtrAB two-component system to provide intrinsic multidrug resistance, cytokinetic control and cell wall homeostasis in *Mycobacterium*. *Mol. Microbiol.* 76, 348–364.
- O’Neill, M.B., Shockey, A., Zarley, A., Aylward, W., Eldholm, V., Kitchen, A., and Pepperell, C.S. (2019). Lineage specific histories of *Mycobacterium tuberculosis* dispersal in Africa and Eurasia. *Mol. Ecol.* 28, 3241–3256.
- Okonechnikov, K., Conesa, A., and García-Alcalde, F. (2016). Qualimap 2: Advanced multi-sample quality control for high-throughput sequencing data. *Bioinformatics* 32, 292–294.
- Palittapongarnpim, P., Ajawatanawong, P., Viratyosin, W., Smittipat, N., Disratthakit, A., Mahasirimongkol, S., Yanai, H., Yamada, N., Nedsuwan, S., Imasanguan, W., et al. (2018). Evidence for Host-Bacterial Co-evolution via Genome Sequence Analysis of 480 Thai *Mycobacterium tuberculosis* Lineage 1 Isolates. *Sci. Rep.* 8, 1–14.
- Personne, Y., and Parish, T. (2014). *Mycobacterium tuberculosis* possesses an unusual tmRNA rescue system. *Tuberculosis* 94, 34–42.
- Peterson, E.J., Brooks, A.N., Reiss, D.J., Kaur, A., Wu, W.-J., Srinivas, V., Turkarslan, S., Pan, M., Carter, W., Arrieta-Ortiz, M.L., et al. (2021). MtrA regulation of essential peptidoglycan cleavage in *Mycobacterium tuberculosis* during infection 1. *BioRxiv* 2021.02.25.432019.
- Phelan, J.E., Lim, D.R., Mitarai, S., de Sessions, P.F., Tujan, M.A.A., Reyes, L.T., Medado, I.A.P., Palparan, A.G., Naim, A.N.M., Jie, S., et al. (2019). *Mycobacterium tuberculosis* whole genome sequencing provides insights into the Manila strain and drug-resistance mutations in the Philippines. *Sci. Rep.* 9, 1–6.
- Pi, R., Liu, Q., Jiang, Q., and Gao, Q. (2019). Characterization of linezolid-resistance-associated mutations in *Mycobacterium tuberculosis* through WGS. *J. Antimicrob. Chemother.* 74, 1795–1798.
- Piddock, L.J., Williams, K.J., and Ricci, V. (2000). Accumulation of rifampicin by *Mycobacterium aurum*, *Mycobacterium smegmatis* and *Mycobacterium tuberculosis*. *J. Antimicrob. Chemother.* 45, 159–165.
- Price, M.N., Dehal, P.S., and Arkin, A.P. (2010). FastTree 2 - Approximately maximum-likelihood trees for large alignments. *PLoS One* 5.
- Qi, L.S., Larson, M.H., Gilbert, L.A., Doudna, J.A., Weissman, J.S., Arkin, A.P., and Lim, W.A. (2013). Repurposing CRISPR as an RNA-guided platform for sequence-specific control of gene expression. *Cell* 152, 1173–1183.
- Rajagopal, M., Martin, M.J., Santiago, M., Lee, W., Kos, V.N., Meredith, T., Gilmore, M.S., and Walker, S. (2016). Multidrug intrinsic resistance factors in *Staphylococcus aureus* identified by profiling fitness within high-diversity transposon libraries. *MBio* 7.
- Reeves, A.Z., Campbell, P.J., Sultana, R., Malik, S., Murray, M., Plikaytis, B.B., Shinnick, T.M., and Posey, J.E. (2013). Aminoglycoside Cross-Resistance in *Mycobacterium tuberculosis* Due to Mutations in the 5′ Untranslated Region of *whiB7*.
- Rempel, S., Gati, C., Nijland, M., Thangaratnarajah, C., Karyolaimos, A., de Gier, J.W., Guskov, A., and

- Slotboom, D.J. (2020). A mycobacterial ABC transporter mediates the uptake of hydrophilic compounds. *Nature* 580, 409–412.
- Rock, J.M., Hopkins, F.F., Chavez, A., Diallo, M., Chase, M.R., Gerrick, E.R., Pritchard, J.R., Church, G.M., Rubin, E.J., Sasseti, C.M., et al. (2017). Programmable transcriptional repression in mycobacteria using an orthogonal CRISPR interference platform. *Nat. Microbiol.* 2.
- Rodvold, K.A. (1999). Clinical pharmacokinetics of clarithromycin. *Clin. Pharmacokinet.* 37, 385–398.
- Safi, H., Gopal, P., Lingaraju, S., Ma, S., Levine, C., Dartois, V., Yee, M., Li, L., Blanc, L., Liang, H.P.H., et al. (2019). Phase variation in *Mycobacterium tuberculosis* *glpK* produces transiently heritable drug tolerance. *Proc. Natl. Acad. Sci. U. S. A.* 116, 19665–19674.
- Sandgren, A., Strong, M., Muthukrishnan, P., Weiner, B.K., Church, G.M., and Murray, M.B. (2009). Tuberculosis drug resistance mutation database. *PLoS Med.* 6, 0132–0136.
- Sasseti, C.M., Smith, C.M., Baker, R.E., and Ioerger, T.R. (2020). Antibiotics against *Mycobacterium tuberculosis*. 5, 1–18.
- Schrader, S.M., Botella, H., Jansen, R., Ehrt, S., Rhee, K., Nathan, C., and Vaubourgeix, J. (2021). Multiform antimicrobial resistance from a metabolic mutation. *Sci. Adv.* 7, 1–18.
- Seemann, T. et al. (2020). Snippy - Rapid haploid variant calling and core genome alignment.
- Seung, K.J., Becerra, M.C., Atwood, S.S., Alcántara, F., Bonilla, C.A., and Mitnick, C.D. (2014). Salvage therapy for multidrug-resistant tuberculosis. *Clin. Microbiol. Infect.* 20, 441–446.
- Sharkey, L.K.R., Edwards, T.A., and O'Neill, A.J. (2016). ABC-F proteins mediate antibiotic resistance through ribosomal protection. *MBio* 7.
- Sharma, A.K., Chatterjee, A., Gupta, S., Banerjee, R., Mandal, S., Mukhopadhyay, J., Basu, J., and Kundu, M. (2015). MtrA, an essential response regulator of the MtrAB two-component system, regulates the transcription of resuscitation-promoting factor B of *Mycobacterium tuberculosis*. *Microbiol. (United Kingdom)* 161, 1271–1281.
- Sheen, P., Couvin, D., Grandjean, L., Zimic, M., Dominguez, M., Luna, G., Gilman, R.H., Rastogi, N., and Moore, D.A.J. (2013). Genetic Diversity of *Mycobacterium tuberculosis* in Peru and Exploration of Phylogenetic Associations with Drug Resistance. *PLoS One* 8.
- Shell, S.S., Wang, J., Lapierre, P., Mir, M., Chase, M.R., Pyle, M.M., Gawande, R., Ahmad, R., Sarracino, D.A., Ioerger, T.R., et al. (2015). Leaderless Transcripts and Small Proteins Are Common Features of the Mycobacterial Translational Landscape. *PLoS Genet.* 11, 1–31.
- da Silva, P.E.A., von Groll, A., Martin, A., and Palomino, J.C. (2011). Efflux as a mechanism for drug resistance in *Mycobacterium tuberculosis*. *FEMS Immunol. Med. Microbiol.* 63, 1–9.
- Thibault, D., Jensen, P.A., Wood, S., Qabar, C., Clark, S., Shainheit, M.G., Isberg, R.R., and van Opijnen, T. (2019). Droplet Tn-Seq combines microfluidics with Tn-Seq for identifying complex single-cell phenotypes. *Nat. Commun.* 10.
- Trouplin, V., Boucherit, N., Gorvel, L., Conti, F., Mottola, G., and Ghigo, E. (2013). Bone marrow-derived macrophage production. *J. Vis. Exp.*
- Truffot-Pernot, C., Lounis, N., Grosset, J.H., and Ji, B. (1995). Clarithromycin is inactive against *Mycobacterium tuberculosis*. *Antimicrob. Agents Chemother.* 39, 2827–2828.
- Vargas, R., Freschi, L., Spitaleri, A., Tahseen, S., Barilar, I., Niemann, S., Miotto, P., Cirillo, D.M., Köser, C.U., and Farhat, M.R. (2021). The role of epistasis in amikacin, kanamycin, bedaquiline, and clofazimine resistance in *Mycobacterium tuberculosis* complex. *BioRxiv* 2021.05.07.443178.
- Vilchèze, C., and Jacobs JR., W.R. (2014). Resistance to Isoniazid and Ethionamide in *Mycobacterium tuberculosis*: Genes, Mutations, and Causalities. *Microbiol. Spectr.* 2.
- Walker, T.M., Kohl, T.A., Omar, S. V., Hedge, J., Del Ojo Elias, C., Bradley, P., Iqbal, Z., Feuerriegel, S., Niehaus, K.E., Wilson, D.J., et al. (2015). Whole-genome sequencing for prediction of *Mycobacterium*

tuberculosis drug susceptibility and resistance: A retrospective cohort study. *Lancet Infect. Dis.* *15*, 1193–1202.

Warit, et al. (2015). Genetic characterisation of a whiB7 mutant of a *Mycobacterium tuberculosis* clinical strain. *J Glob Antimicrob Resist* *3(4)*, 262–266.

Wasserman, S., Louw, G., Ramangoela, L., Barber, G., Hayes, C., Omar, S.V., Maartens, G., Barry, C., Song, T., and Meintjes, G. (2019). Linezolid resistance in patients with drug-resistant TB and treatment failure in South Africa. *J. Antimicrob. Chemother.* *74*, 2377–2384.

WHO (2021). *Global Tuberculosis Report*.

Wilson, D.N. (2014). Ribosome-targeting antibiotics and mechanisms of bacterial resistance. *Nat. Rev. Microbiol.* *12*, 35–48.

Wong, S.Y., Lee, J.S., Kwak, H.K., Via, L.E., Boshoff, H.I.M., and Barry, C.E. (2011). Mutations in *gidB* confer low-level streptomycin resistance in *Mycobacterium tuberculosis*. *Antimicrob. Agents Chemother.* *55*, 2515–2522.

Wong, S.Y., Javid, B., Addepalli, B., Piszczek, G., Strader, M.B., Limbach, P.A., and Barry, C.E. (2013). Functional role of methylation of G518 of the 16S rRNA 530 loop by *GidB* in *Mycobacterium tuberculosis*. *Antimicrob. Agents Chemother.* *57*, 6311–6318.

Xia, E., Teo, Y.Y., and Ong, R.T.H. (2016). *SpoTyping*: Fast and accurate in silico *Mycobacterium* spoligotyping from sequence reads. *Genome Med.* *8*, 19.

Xu, W., Dejesus, M.A., Rücker, N., Engelhart, C.A., Wright, M.G., Healy, C., Lin, K., Wang, R., Park, S.W., Ioerger, T.R., et al. (2017). Chemical Genetic Interaction Profiling Reveals Determinants of Intrinsic Antibiotic Resistance in *Mycobacterium tuberculosis*.

Yin, S., Daum, R.S., and Boyle-Vavra, S. (2006). *VraSR* two-component regulatory system and its role in induction of *pbp2* and *vraSR* expression by cell wall antimicrobials in *Staphylococcus aureus*. *Antimicrob. Agents Chemother.* *50*, 336–343.

Zahrt, T.C., and Deretic, V. (2000). An essential two-component signal transduction system in *Mycobacterium tuberculosis*. *J. Bacteriol.* *182*, 3832–3838.

Zaunbrecher, M.A., Sikes, R.D., Metchock, B., Shinnick, T.M., and Posey, J.E. (2009). Overexpression of the chromosomally encoded aminoglycoside acetyltransferase *eis* confers kanamycin resistance in *Mycobacterium tuberculosis*. *Proc. Natl. Acad. Sci. U. S. A.* *106*, 20004–20009.

Zhang, Y., Heym, B., Allen, B., Young, D., and Cole, S. (1992). The catalase - Peroxidase gene and isoniazid resistance of *Mycobacterium tuberculosis*. *Nature* *358*, 591–593.

Zimmerman, M., Lestner, J., Prideaux, B., O'Brien, P., Dias-Freedman, I., Chen, C., Dietzold, J., Daudelin, I., Kaya, F., Blanc, L., et al. (2017). Ethambutol partitioning in tuberculous pulmonary lesions explains its clinical efficacy. *Antimicrob. Agents Chemother.* *61*.
